# Supplementary material
Source: PubMed Central journal article supplement (PMC6898745)
Supplement: NIHMS1045919-supplement-SDC.pdf [file NIHMS1045919-supplement-SDC.pdf]

## Supplemental Digital Content

### Contents

|                                                                                           |    |
|-------------------------------------------------------------------------------------------|----|
| eSection 1. Algorithm for Assignment of Patients to Surgeons .....                        | 2  |
| eSection 2. Description of Matching Algorithm.....                                        | 3  |
| eSection 3. 30-day Resource Cost Algorithm.....                                           | 5  |
| eTable 1. List of ICD-9 Principal Procedure Codes and Categories .....                    | 7  |
| eTable 2. List of Current Procedure Terminology (CPT) Procedure Codes and Categories..... | 11 |
| eTable 3. Patient Selection Summary .....                                                 | 23 |
| eTable 4. Risk Models for 30-day Mortality .....                                          | 24 |
| eTable 4b. General Surgery (2009-9/30/2010) Risk Model (Comorbidities Only).....          | 26 |
| eTable 4c. Orthopedics (2009-9/30/2010) Risk Model.....                                   | 27 |
| eTable 4d. Orthopedics (2009-9/30/2010) Risk Model (Comorbidities Only).....              | 28 |
| eTable 4e. General Surgery (10/1/2010-2013) Risk Model.....                               | 29 |
| eTable 4f. General Surgery (10/1/2010-2013) Risk Model (Comorbidities Only Model).....    | 31 |
| eTable 4g. Orthopedics (10/1/2010-2013) Risk Model.....                                   | 32 |
| eTable 4h. Orthopedics (10/1/2010-2013) Risk Model (Comorbidities Only).....              | 33 |
| eTable 5. Prolonged Length of Stay.....                                                   | 34 |
| eTable 6. Complete Step Table.....                                                        | 35 |
| eTable 6a. Step Table for General Surgery .....                                           | 38 |
| eTable 6b. Step Table for Orthopedic Surgery .....                                        | 41 |
| eTable 7. Complete Matching Tables for Year Match .....                                   | 43 |
| eTable 7a. General Surgery Year Match.....                                                | 45 |
| eTable 7b. Orthopedic Surgery Year Match .....                                            | 47 |
| eTable 8. Complete Matching Tables for Operation Match .....                              | 49 |
| eTable 8a. General Surgery Operation Match.....                                           | 51 |
| eTable 8b. Orthopedic Surgery Operation Match .....                                       | 53 |
| eTable 9. Complete Matching Tables for Emergent Status Match.....                         | 55 |
| eTable 9a. General Surgery Emergent Status Match .....                                    | 57 |
| eTable 9b. Orthopedic Surgery Emergent Status Match.....                                  | 59 |
| eTable 10. Complete Matching Tables for Risk Factor Match.....                            | 61 |
| eTable 10a. General Surgery Risk Factor Match .....                                       | 63 |
| eTable 10b. Orthopedic Surgery Risk-Factor Match .....                                    | 65 |
| eTable 11. Outcomes by Surgery Type.....                                                  | 67 |
| eTable 11a.Outcomes for General Surgery .....                                             | 67 |
| eTable 11b.Outcomes for Orthopedic Surgery .....                                          | 68 |

## eSection 1. Algorithm for Assignment of Patients to Surgeons

1. First, pull qualifying index admissions by ICD-9 principal procedure code (ICD\_PRCDR\_CD\_1).
2. Bariatric Surgery Screen: Select admissions with ICD-9 principal procedure codes 4382, 4389, 443, 4431, 4438, 4439, 4468, 4469, 4495.
  - a. In the inpatient bill, check Diagnosis Related Group (DRG) field for a bariatric surgery DRG (619, 620, or 621), or an ICD-9 diagnosis code related to obesity. If either exists, the admission is classified as bariatric.
  - b. If neither of these conditions are met, re-assign the ICD-9 admissions as follows:
    - i. 4382: Exclude from the study
    - ii. 4389: reassign to stomach partial gastrectomy
    - iii. 443, 4438, 4439: reassign to stomach gastric bypass (non-bariatric)
    - iv. 4431: Exclude from the study
    - v. 4468: reassign to stomach other
    - vi. 4469: reassign to stomach other
    - vii. 4495: Exclude from the study
3. For all other refined PPX categories, link them to a qualifying CPT code from the same ICD-9 category:
  - a. First, look for a CPT bill from the exact same narrow PPX category, as follows:
    - i. If a single qualifying CPT bill from the same narrow category as the ICD-9 PPX appeared on the same day, assign the admission to that Physician.
    - ii. If multiple CPT bills from the same narrow category as the ICD-9 PPX appear on the same day, assign the patient to the Physician who submitted the highest-revenue bill.
    - iii. If one or more qualifying CPT bill from the same narrow category did not occur on the same day, but were submitted on a different day, assign the patient to the Physician who submitted the first CPT bill during the hospitalization, and reassign the patient to that bill's CPT-based narrow category.
  - b. If no qualifying bills from the same narrow category appear, revert to checking for any CPT bill from the same broad CPT category, as follows:
    - i. If a single CPT bill from the same broad category as the ICD-9 PPX occurred on the same day as the ICD-9 PPX, assign the patient to that Physician, and reassign the patient to that bill's CPT-based narrow category.
    - ii. If multiple CPT bills from the same broad category as the ICD-9 PPX occurred on the same day as the ICD-9 PPX, then assign the patient to the Physician who submitted the highest-revenue bill, and reassign the patient to that bill's CPT-based narrow category.
    - iii. If one or more qualifying CPT bills from the same broad category as the ICD-9 PPX did not occur on the same day, but were submitted on a different day than the ICD-9 PPX, assign the patient to the Physician who submitted the first such bill during the hospitalization, and reassign the patient to that bill's CPT-based narrow category.

## **eSection 2. Description of Matching Algorithm**

### **The Surgeon Match**

We first formed surgeon pairs practicing in the same hospital using a distance function. The function only included the procedures performed. Using the 10 randomly sampled patients for each new surgeon, new surgeons were optimally paired to the experienced surgeon who performed at least as many of the same procedures.

### **The Year Match**

After pairing new and experienced surgeons, we then matched their patients based only on the year of admission and a propensity score for admission to a new surgeon. The propensity score included only covariates being matched. This match serves as the baseline for comparing new and experienced surgeons.

### **The Operation Match**

We then matched the new surgeon patients to those of their experienced counterpart on year, procedure category, and propensity for admission by a new surgeon. The propensity score included only covariates being matched.

### **The Emergent Status Match**

In addition to the covariates in the procedure match, we further added an indicator for emergent admission to the matching algorithm. The propensity score was revised to include emergent status.

### **The Risk Factor Match**

In addition to all covariates in the emergent status match, we added the following variables to the risk factor match:

- Demographic Variables
  - Age on admission, in years
  - Age 65-69
  - Age 70-74
  - Age 75-79
  - Age 80-84
  - Age 85+
  - Sex
- Admission Characteristics
  - Transfer-in
  - Hospitalization in 6 months prior to admission
- Secondary Procedures on Same Day
  - Major therapeutic
- Comorbidities
  - Congestive heart failure
  - Past myocardial infarction
  - Past arrhythmia
  - Angina
  - Valvular disease
  - Unstable angina
  - Hypertension
  - Diabetes
  - Renal dysfunction
  - Renal failure
  - Liver disease
  - Cancer
  - Specific abdominal cancer
  - Chronic obstructive pulmonary disease

- Asthma
- Post-inflammatory pulmonary fibrosis
- Dementia
- Stroke
- Seizure
- Paraplegia
- Hypothyroidism
- Collagen vascular disease
- Hemoglobinopathy
- AIDS
- Chronic peptic ulcer
- Coagulopathy
- Other coagulopathy
- Cushing's disease
- Graves' disease
- Thrombocytopenia
- Scores
  - Propensity score for treatment by a new physician (revised at each match to include all matching covariates)
  - Risk of 30-day mortality (using all patient risk factors)
  - Risk of 30-day mortality (using comorbidities only)
  - Comorbidity count

**eSection 3. 30-day Resource Cost Algorithm.**

**A. Exclusions for Non-Acute Care**

1. Inpatient Hospital (Part A) File

- a. Exclude claim for hospitalizations in non-acute settings using 6-digit Medicare hospital ID (A if the 3<sup>rd</sup> position of the ID is not equal to “0” or if the 3<sup>rd</sup> and 4<sup>th</sup> positions are not equal to “13”
  - i. Exclude if 4<sup>th</sup>, 5<sup>th</sup>, or 6<sup>th</sup> position in identifier is not a number
- b. Exclude claim if DRG = 945 or 946 (Rehabilitation)

2. Outpatient File

- a. Exclude claim for encounters in non-acute settings using 6-digit Medicare hospital ID (hospital identified as other than “Short-term (General and Specialty) Hospital” or “Critical Access Hospital”)
  - i. Exclude if the 3<sup>rd</sup> position of the ID is not equal to “0” or if the 3<sup>rd</sup> and 4<sup>th</sup> positions are not equal to “13”
  - ii. Exclude if 4<sup>th</sup>, 5<sup>th</sup>, or 6<sup>th</sup> position in identifier is not a number
- b. Exclude claim if principal diagnosis = V57 or subterms (Care involving use of rehabilitation procedures)

3. Surgeon/Carrier (Part B) File

- a. Exclude any claim if the from and through dates fall on or between the admission and discharge dates of a non-acute hospitalization (as defined above) or between the from and through dates of a claim for outpatient care in a non-acute hospital
- b. Exclude claim if no line item place of service codes from the following list appear:

|                                                 |                                          |
|-------------------------------------------------|------------------------------------------|
| 11 = Office                                     | 15 = Mobile Unit                         |
| 20 = Urgent Care Facility                       | 21 = Inpatient hospital                  |
| 22 = Outpatient hospital                        | 23 = Emergency room - hospital           |
| 24 = Ambulatory surgical center                 | 41 = Ambulance - land                    |
| 42 = Ambulance - air or water                   | 50 = Federally qualified health centers  |
| 65 = End stage renal disease treatment facility | 71 = State or local public health clinic |
| 81 Independent laboratory                       |                                          |

- c. Exclude claim if principal diagnosis = V57 or subterms (Care involving use of rehabilitation procedures)

**B. Resource Utilization-Based Cost Accounting**

1. Facility and Accommodation Costs from the Inpatient File:

a. Accommodations:

- i. Determine number of inpatient critical care and non-critical care days from revenue centers in the Inpatient file.
- ii. Multiply number of critical care/non-critical care days by average daily cost for each type (adjust to 2013 values using the Bureau of Labor & Statistics inflation factor, hospital component - CCM: \$4,627.52; Int-CCM: \$3,072.08; Non-CCM: \$1,516.64)

| Non-Critical Care Revenue Centers                 | Intermediate Care Revenue Centers | Critical Care Revenue Centers |
|---------------------------------------------------|-----------------------------------|-------------------------------|
| 0100-0101 All-inclusive rate-room and board       | 0206 Intermediate care            | 0200-0205 Intensive care      |
| 0110-0119 Private medical or general              |                                   | 0207-0209 Intensive care      |
| 0120-0129 Semi-private 2 bed (medical or general) |                                   | 0210-0213, Coronary care      |
| 0130-0139 Semi-private 3 and 4 beds               |                                   | 0219 Coronary care            |
| 0140-0149 Private (deluxe)                        |                                   |                               |
| 0150-0159 Room & Board ward (medical or general)  |                                   |                               |
| 0160, 0164, 0167 Other Room & Board               |                                   |                               |

b. Operating Room Time Cost (index admission only)

- i. Determine operating room time using “best anesthesia chart time,” if available; If best anesthesia time missing, use claim anesthesia time from Surgeon/Carrier (Part B) file; if

- both best chart time and claim time missing, assign each patient median best anesthesia time by procedure
    - ii. Multiply anesthesia time by mean of OR time cost range and inflate to 2013 dollars (\$21.20/minute)
  - b. Emergency Room Visit Fixed Costs (post-discharge only)
    - i. For post-discharge Part B records only, separate records into line items and locate place of service code 23 (“Emergency Room – Hospital”)
    - ii. Treat each unique ER date as separate visit, sum visits per patient
  - c. Multiply by average ER visit cost, inflated to 2013 dollars (\$526.90)
- 2. Service Costs from Carrier/Part B and Outpatient Files: (Note: Office visits, Home Care, SNF, and non-ER Outpatient use only section 2 methods)
  - a. Separate line items from Part B (each includes patient ID, CPT code, units count, place of service)
  - b. Anesthesia - if first two digits of CPT code are 00 or 01, code indicates anesthesia billing
    - i. Apply standard CMS base units (2013 list) to each CPT code; if applicable, anesthesia modifier AD reduces base units to 3 per procedure for medical supervision
    - ii. Since time units count reflects anesthesia time in minutes divided by 1.5, divide reported time by 10 to determine number of 15-minute anesthesia time units
    - iii. Add base and time units for each line item, multiply by \$21.92 (un-weighted mean of locality conversion factors, number needs to be revised once national CF available); If applicable, anesthesia modifier QK reduces total AVUs by 50% of allowed rate for medical direction of multiple procedures
    - iv. Sum anesthesia line item costs by patient
  - c. Other Services - apply method to all non-anesthesia Part B line items
    - i. Merge line item CPT with AMA CPT/RVU list (2013 file) to determine RVU for each
    - ii. Using place of service codes, determine whether facility or non-facility RVU is appropriate – for this cost estimate, treat outpatient hospitals as “non-facility” sites of care to adjust for facility component of service costs
    - iii. Multiply RVUs by line item service count (=1 in 99% of non-anesthesia cases)
    - iv. Multiply total RVUs by conversion factor (\$34.02 in 2013)
    - v. Sum line item costs by patient
- 3. Time Frame Under Assessment for Resource Utilization-based Cost Accounting:
  - a. In-hospital costs account for all patient claims during the time period of the index hospitalization
  - b. 30-day costs account for all in-hospital costs, plus any other bills (ER visits, and any bills in the Outpatient and Carrier/Part B files) that occurred within 30 days of admission, and any bills accrued during the entirety of any readmission that began within 30 days of admission.
- 4. Summary Equation:

$$C_{i,30} = (D_{inp}^{CC} * 4,627.52 + D_{inp}^{Int-C} * 3,072.08 + D_{inp}^{NCC} * 1,516.64) + (T_{OR} * 21.20) + AU * 21.92 + ER * 526.90 + \sum RVU_j * 34.02 + RC$$

$D_{inp}^{CC}$  = Number of days in critical care

$D_{inp}^{Int-C}$  = Number of days in intermediate care

$D_{inp}^{NCC}$  = Number of days on hospital floor

$T_{OR}$  = Number of minutes in operating room

AU = Number of anesthesia units

ER = Number of emergency room days

$RVU_j$  = Number of all j RVUs from all bills over defined time period that includes all outpatient and office visits

RC = Readmission costs—all costs associated with hospitalization that began within 30 days of readmission

**eTable 1. List of ICD-9 Principal Procedure Codes and Categories**

| <b>Surgical Group</b> | <b>ICD-9 Code</b> | <b>ICD-9 Label</b>                                                                            | <b>Procedure Category</b> | <b>Broad Category</b> |
|-----------------------|-------------------|-----------------------------------------------------------------------------------------------|---------------------------|-----------------------|
| General Surgery       | 0722              | Unilateral adrenalectomy                                                                      | Adrenalectomy             | adrenal               |
| General Surgery       | 0729              | Other partial adrenalectomy                                                                   | Adrenalectomy             | adrenal               |
| General Surgery       | 073               | Bilateral adrenalectomy                                                                       | Adrenalectomy             | adrenal               |
| General Surgery       | 4701              | Laparoscopic appendectomy                                                                     | Appendectomy              | bowel                 |
| General Surgery       | 4709              | Other appendectomy                                                                            | Appendectomy              | bowel                 |
| General Surgery       | 4382              | Laparoscopic vertical (sleeve) gastrectomy                                                    | Bariatric                 | bariatric             |
| General Surgery       | 4389              | Other partial gastrectomy, other                                                              | Bariatric                 | bariatric             |
| General Surgery       | 443               | Gastroenterostomy without gastrectomy                                                         | Bariatric                 | bariatric             |
| General Surgery       | 4431              | High gastric bypass                                                                           | Bariatric                 | bariatric             |
| General Surgery       | 4438              | Laparoscopic gastroenterostomy                                                                | Bariatric                 | bariatric             |
| General Surgery       | 4439              | Other gastroenterostomy                                                                       | Bariatric                 | bariatric             |
| General Surgery       | 4468              | Laparoscopic gastroplasty                                                                     | Bariatric                 | bariatric             |
| General Surgery       | 4469              | Other repair of stomach, other                                                                | Bariatric                 | bariatric             |
| General Surgery       | 4495              | Laparoscopic gastric restrictive procedure                                                    | Bariatric                 | bariatric             |
| General Surgery       | 5141              | Common duct exploration for removal of calculus                                               | Biliary common duct       | HPB                   |
| General Surgery       | 5151              | Exploration of common duct                                                                    | Biliary common duct       | HPB                   |
| General Surgery       | 5132              | Anastomosis of gallbladder to intestine                                                       | Biliary other             | HPB                   |
| General Surgery       | 5136              | Choledochoenterostomy                                                                         | Biliary other             | HPB                   |
| General Surgery       | 5137              | Anastomosis of hepatic duct to gastrointestinal tract                                         | Biliary other             | HPB                   |
| General Surgery       | 5122              | Cholecystectomy                                                                               | Cholecystectomy           | HPB                   |
| General Surgery       | 5123              | Laparoscopic cholecystectomy                                                                  | Cholecystectomy           | HPB                   |
| General Surgery       | 5124              | Laparoscopic partial cholecystectomy                                                          | Cholecystectomy           | HPB                   |
| General Surgery       | 1731              | Laparoscopic multiple segmental resection of large intestine                                  | Colectomy Partial - Lap   | bowel                 |
| General Surgery       | 1732              | Laparoscopic cecectomy                                                                        | Colectomy Partial - Lap   | bowel                 |
| General Surgery       | 1733              | Laparoscopic right hemicolectomy                                                              | Colectomy Partial - Lap   | bowel                 |
| General Surgery       | 1734              | Laparoscopic resection of transverse colon                                                    | Colectomy Partial - Lap   | bowel                 |
| General Surgery       | 1735              | Laparoscopic left hemicolectomy                                                               | Colectomy Partial - Lap   | bowel                 |
| General Surgery       | 1736              | Laparoscopic sigmoidectomy                                                                    | Colectomy Partial - Lap   | bowel                 |
| General Surgery       | 1739              | Other laparoscopic partial excision of large intestine                                        | Colectomy Partial - Lap   | bowel                 |
| General Surgery       | 4571              | Open and other multiple segmental resection of large intestine                                | Colectomy Partial – Open  | bowel                 |
| General Surgery       | 4572              | Open and other cecectomy                                                                      | Colectomy Partial – Open  | bowel                 |
| General Surgery       | 4573              | Open and other right hemicolectomy                                                            | Colectomy Partial – Open  | bowel                 |
| General Surgery       | 4574              | Open and other resection of transverse colon                                                  | Colectomy Partial – Open  | bowel                 |
| General Surgery       | 4575              | Open and other left hemicolectomy                                                             | Colectomy Partial – Open  | bowel                 |
| General Surgery       | 4576              | Open and other sigmoidectomy                                                                  | Colectomy Partial – Open  | bowel                 |
| General Surgery       | 4579              | Other and unspecified partial excision of large intestine                                     | Colectomy Partial – Open  | bowel                 |
| General Surgery       | 4581              | Laparoscopic total intra-abdominal colectomy                                                  | Colectomy Total - Lap     | bowel                 |
| General Surgery       | 458               | Total intra-abdominal colectomy                                                               | Colectomy Total - Open    | bowel                 |
| General Surgery       | 4582              | Open total intra-abdominal colectomy                                                          | Colectomy Total - Open    | bowel                 |
| General Surgery       | 4583              | Other and unspecified total intra-abdominal colectomy                                         | Colectomy Total - Open    | bowel                 |
| General Surgery       | 4240              | Esophagectomy, not otherwise specified                                                        | Esophagectomy             | UGI                   |
| General Surgery       | 4241              | Partial esophagectomy                                                                         | Esophagectomy             | UGI                   |
| General Surgery       | 4242              | Total esophagectomy                                                                           | Esophagectomy             | UGI                   |
| General Surgery       | 427               | Esophagomyotomy                                                                               | Esophagomyotomy           | UGI                   |
| General Surgery       | 5342              | Laparoscopic repair of umbilical hernia with graft or prosthesis                              | Hernia Abdominal – Lap    | Hernia                |
| General Surgery       | 5343              | Other laparoscopic umbilical herniorrhaphy                                                    | Hernia Abdominal – Lap    | Hernia                |
| General Surgery       | 5362              | Laparoscopic incisional hernia repair with graft or prosthesis                                | Hernia Abdominal – Lap    | Hernia                |
| General Surgery       | 5363              | Other laparoscopic repair of other hernia of anterior abdominal wall with graft or prosthesis | Hernia Abdominal – Lap    | Hernia                |
| General Surgery       | 5341              | Other and open repair of umbilical hernia with graft or prosthesis                            | Hernia Abdominal – Open   | Hernia                |
| General Surgery       | 5349              | Other open umbilical herniorrhaphy                                                            | Hernia Abdominal – Open   | Hernia                |
| General Surgery       | 5351              | Incisional hernia repair                                                                      | Hernia Abdominal – Open   | Hernia                |
| General Surgery       | 5359              | Repair of other hernia of anterior abdominal wall                                             | Hernia Abdominal – Open   | Hernia                |
| General Surgery       | 5361              | Other open incisional hernia repair with graft or prosthesis                                  | Hernia Abdominal – Open   | Hernia                |

| <b>Surgical Group</b> | <b>ICD-9 Code</b> | <b>ICD-9 Label</b>                                                                                        | <b>Procedure Category</b> | <b>Broad Category</b> |
|-----------------------|-------------------|-----------------------------------------------------------------------------------------------------------|---------------------------|-----------------------|
| General Surgery       | 5369              | Other and open repair of other hernia of anterior abdominal wall with graft or prosthesis                 | Hernia Abdominal – Open   | Hernia                |
| General Surgery       | 1711              | Laparoscopic repair of direct inguinal hernia with graft or prosthesis                                    | Hernia Groin – Lap        | Hernia                |
| General Surgery       | 1712              | Laparoscopic repair of indirect inguinal hernia with graft or prosthesis                                  | Hernia Groin – Lap        | Hernia                |
| General Surgery       | 1713              | Laparoscopic repair of inguinal hernia with graft or prosthesis, not otherwise specified                  | Hernia Groin – Lap        | Hernia                |
| General Surgery       | 1721              | Laparoscopic bilateral repair of direct inguinal hernia with graft or prosthesis                          | Hernia Groin – Lap        | Hernia                |
| General Surgery       | 1722              | Laparoscopic bilateral repair of indirect inguinal hernia with graft or prosthesis                        | Hernia Groin – Lap        | Hernia                |
| General Surgery       | 1723              | Laparoscopic bilateral repair of inguinal hernia, one direct and one indirect, with graft or prosthesis   | Hernia Groin – Lap        | Hernia                |
| General Surgery       | 1724              | Laparoscopic bilateral repair of inguinal hernia with graft or prosthesis, not otherwise specified        | Hernia Groin – Lap        | Hernia                |
| General Surgery       | 5300              | Unilateral repair of inguinal hernia, not otherwise specified                                             | Hernia Groin – Open       | Hernia                |
| General Surgery       | 5301              | Other and open repair of direct inguinal hernia                                                           | Hernia Groin – Open       | Hernia                |
| General Surgery       | 5302              | Other and open repair of indirect inguinal hernia                                                         | Hernia Groin – Open       | Hernia                |
| General Surgery       | 5303              | Other and open repair of direct inguinal hernia with graft or prosthesis                                  | Hernia Groin – Open       | Hernia                |
| General Surgery       | 5304              | Other and open repair of indirect inguinal hernia with graft or prosthesis                                | Hernia Groin – Open       | Hernia                |
| General Surgery       | 5305              | Repair of inguinal hernia with graft or prosthesis, not otherwise specified                               | Hernia Groin – Open       | Hernia                |
| General Surgery       | 5310              | Bilateral repair of inguinal hernia, not otherwise specified                                              | Hernia Groin – Open       | Hernia                |
| General Surgery       | 5311              | Other and open bilateral repair of direct inguinal hernia                                                 | Hernia Groin – Open       | Hernia                |
| General Surgery       | 5312              | Other and open bilateral repair of indirect inguinal hernia                                               | Hernia Groin – Open       | Hernia                |
| General Surgery       | 5313              | Other and open bilateral repair of inguinal hernia, one direct and one indirect                           | Hernia Groin – Open       | Hernia                |
| General Surgery       | 5314              | Other and open bilateral repair of direct inguinal hernia with graft or prosthesis                        | Hernia Groin – Open       | Hernia                |
| General Surgery       | 5315              | Other and open bilateral repair of indirect inguinal hernia with graft or prosthesis                      | Hernia Groin – Open       | Hernia                |
| General Surgery       | 5316              | Other and open bilateral repair of inguinal hernia, one direct and one indirect, with graft or prosthesis | Hernia Groin – Open       | Hernia                |
| General Surgery       | 5317              | Bilateral inguinal hernia repair with graft or prosthesis, not otherwise specified                        | Hernia Groin – Open       | Hernia                |
| General Surgery       | 5321              | Unilateral repair of femoral hernia with graft or prosthesis                                              | Hernia Groin – Open       | Hernia                |
| General Surgery       | 5329              | Other unilateral femoral herniorrhaphy                                                                    | Hernia Groin – Open       | Hernia                |
| General Surgery       | 459               | Intestinal anastomosis                                                                                    | Large Bowel Other         | bowel                 |
| General Surgery       | 4590              | Intestinal anastomosis, not otherwise specified                                                           | Large Bowel Other         | bowel                 |
| General Surgery       | 4592              | Anastomosis of small intestine to rectal stump                                                            | Large Bowel Other         | bowel                 |
| General Surgery       | 4593              | Other small-to-large intestinal anastomosis                                                               | Large Bowel Other         | bowel                 |
| General Surgery       | 4594              | Large-to-large intestinal anastomosis                                                                     | Large Bowel Other         | bowel                 |
| General Surgery       | 4595              | Anastomosis to anus                                                                                       | Large Bowel Other         | bowel                 |
| General Surgery       | 4675              | Suture of laceration of large intestine                                                                   | Large Bowel Other         | bowel                 |
| General Surgery       | 4679              | Other repair of intestine                                                                                 | Large Bowel Other         | bowel                 |
| General Surgery       | 5029              | Other destruction of lesion of liver                                                                      | Liver Other               | HPB                   |
| General Surgery       | 5022              | Partial hepatectomy                                                                                       | Liver Partial Hepatectomy | HPB                   |
| General Surgery       | 503               | Lobectomy of liver                                                                                        | Liver Partial Hepatectomy | HPB                   |
| General Surgery       | 5451              | Laparoscopic lysis of peritoneal adhesions                                                                | Lysis of Adhesions        | bowel                 |
| General Surgery       | 5459              | Other lysis of peritoneal adhesions                                                                       | Lysis of Adhesions        | bowel                 |
| General Surgery       | 8541              | Unilateral simple mastectomy                                                                              | Mastectomy                | Breast                |
| General Surgery       | 8542              | Unilateral simple mastectomy                                                                              | Mastectomy                | Breast                |
| General Surgery       | 8543              | Unilateral extended simple mastectomy                                                                     | Mastectomy                | Breast                |
| General Surgery       | 8544              | Bilateral extended simple mastectomy                                                                      | Mastectomy                | Breast                |
| General Surgery       | 8545              | Unilateral radical mastectomy                                                                             | Mastectomy                | Breast                |



| Surgical Group  | ICD-9 Code | ICD-9 Label                                                                    | Procedure Category                     | Broad Category |
|-----------------|------------|--------------------------------------------------------------------------------|----------------------------------------|----------------|
| General Surgery | 8546       | Bilateral radical mastectomy                                                   | Mastectomy                             | Breast         |
| General Surgery | 8547       | Unilateral extended radical mastectomy                                         | Mastectomy                             | Breast         |
| General Surgery | 8548       | Bilateral extended radical mastectomy                                          | Mastectomy                             | Breast         |
| General Surgery | 5251       | Proximal pancreatectomy                                                        | Pancreatectomy                         | HPB            |
| General Surgery | 5252       | Distal pancreatectomy                                                          | Pancreatectomy                         | HPB            |
| General Surgery | 5253       | Radical subtotal pancreatectomy                                                | Pancreatectomy                         | HPB            |
| General Surgery | 5259       | Other partial pancreatectomy                                                   | Pancreatectomy                         | HPB            |
| General Surgery | 526        | Total pancreatectomy                                                           | Pancreatectomy                         | HPB            |
| General Surgery | 527        | Radical pancreaticoduodenectomy                                                | Pancreatectomy                         | HPB            |
| General Surgery | 0681       | Complete parathyroidectomy                                                     | Parathyroidectomy                      | Endocrine      |
| General Surgery | 0689       | Other parathyroidectomy                                                        | Parathyroidectomy                      | Endocrine      |
| General Surgery | 5493       | Creation of cutaneoperitoneal fistula                                          | PD Access Procedure                    | Bowel          |
| General Surgery | 4849       | Other pull-through resection of rectum                                         | Proctectomy                            | Bowel          |
| General Surgery | 485        | Abdominoperineal resection of rectum                                           | Proctectomy                            | Bowel          |
| General Surgery | 4850       | Abdominoperineal resection of the rectum, not otherwise specified              | Proctectomy                            | Bowel          |
| General Surgery | 4851       | Laparoscopic abdominoperineal resection of the rectum                          | Proctectomy                            | Bowel          |
| General Surgery | 4852       | Open abdominoperineal resection of the rectum                                  | Proctectomy                            | Bowel          |
| General Surgery | 4859       | Other abdominoperineal resection of the rectum                                 | Proctectomy                            | Bowel          |
| General Surgery | 4862       | Anterior resection of rectum with synchronous colostomy                        | Proctectomy                            | Bowel          |
| General Surgery | 4863       | Other anterior resection of rectum                                             | Proctectomy                            | Bowel          |
| General Surgery | 4869       | Other resection of rectum                                                      | Proctectomy                            | Bowel          |
| General Surgery | 4875       | Abdominal proctopexy                                                           | Proctopexy                             | Bowel          |
| General Surgery | 4429       | Other pyloroplasty                                                             | Pyloroplasty                           | Bowel          |
| General Surgery | 4591       | Small-to-small intestinal anastomosis                                          | Small Bowel Other                      | Bowel          |
| General Surgery | 4673       | Suture of laceration of small intestine, except duodenum                       | Small Bowel Other                      | Bowel          |
| General Surgery | 4674       | Closure of fistula of small intestine, except duodenum                         | Small Bowel Other                      | Bowel          |
| General Surgery | 4679       | Other repair of intestine                                                      | Small Bowel Other                      | Bowel          |
| General Surgery | 4551       | Isolation of segment of small intestine                                        | Small Bowel Resection                  | Bowel          |
| General Surgery | 4561       | Multiple segmental resection of small intestine                                | Small Bowel Resection                  | Bowel          |
| General Surgery | 4562       | Other partial resection of small intestine                                     | Small Bowel Resection                  | Bowel          |
| General Surgery | 415        | Total splenectomy                                                              | Splenectomy                            | HPB            |
| General Surgery | 4466       | Other procedures for creation of esophagogastric sphincteric competence        | Stomach Anti-Reflux                    | UGI            |
| General Surgery | 4467       | Laparoscopic procedures for creation of esophagogastric sphincteric competence | Stomach Anti-Reflux                    | UGI            |
| General Surgery | 443        | Gastroenterostomy without gastrectomy                                          | Stomach Gastric Bypass (non-bariatric) | UGI            |
| General Surgery | 4438       | Laparoscopic gastroenterostomy                                                 | Stomach Gastric Bypass (non-bariatric) | UGI            |
| General Surgery | 4439       | Other gastroenterostomy                                                        | Stomach Gastric Bypass (non-bariatric) | UGI            |
| General Surgery | 4342       | Local excision of other lesion or tissue of stomach                            | Stomach Other                          | UGI            |
| General Surgery | 4469       | Other repair of stomach, other                                                 | Stomach Other                          | UGI            |
| General Surgery | 435        | Partial gastrectomy with anastomosis to esophagus                              | Stomach Partial Gastrectomy            | UGI            |
| General Surgery | 436        | Partial gastrectomy with anastomosis to duodenum                               | Stomach Partial Gastrectomy            | UGI            |
| General Surgery | 437        | Partial gastrectomy with anastomosis to jejunum                                | Stomach Partial Gastrectomy            | UGI            |
| General Surgery | 4389       | Other partial gastrectomy, other                                               | Stomach Partial Gastrectomy            | UGI            |
| General Surgery | 4399       | Other total gastrectomy                                                        | Stomach Total Gastrectomy              | UGI            |
| General Surgery | 062        | Unilateral thyroid lobectomy                                                   | Thyroidectomy Partial                  | Endocrine      |
| General Surgery | 0631       | Excision of lesion of thyroid                                                  | Thyroidectomy Partial                  | Endocrine      |
| General Surgery | 0639       | Other partial thyroidectomy                                                    | Thyroidectomy Partial                  | Endocrine      |
| General Surgery | 0650       | Substernal thyroidectomy, not otherwise specified                              | Thyroidectomy Substernal               | Endocrine      |

| <b>Surgical Group</b> | <b>ICD-9 Code</b> | <b>ICD-9 Label</b>                                                     | <b>Procedure Category</b> | <b>Broad Category</b> |
|-----------------------|-------------------|------------------------------------------------------------------------|---------------------------|-----------------------|
| General Surgery       | 0651              | Partial substernal thyroidectomy                                       | Thyroidectomy Substernal  | Endocrine             |
| General Surgery       | 0652              | Complete substernal thyroidectomy                                      | Thyroidectomy Substernal  | Endocrine             |
| General Surgery       | 064               | Complete thyroidectomy                                                 | Thyroidectomy Total       | Endocrine             |
| General Surgery       | 4441              | Suture of gastric ulcer site                                           | Ulcer                     | bowel                 |
| General Surgery       | 4442              | Suture of duodenal ulcer site                                          | Ulcer                     | bowel                 |
| Orthopedic Surgery    | 7935              | Open reduction with internal fixation, femur                           | Hip Repair                | ortho                 |
| Orthopedic Surgery    | 8140              | Repair of hip, not elsewhere classified                                | Hip Repair                | ortho                 |
| Orthopedic Surgery    | 8151              | Total hip arthroplasty                                                 | Hip Replacement           | ortho                 |
| Orthopedic Surgery    | 8152              | Partial hip arthroplasty                                               | Hip Replacement           | ortho                 |
| Orthopedic Surgery    | 0070              | Revision of hip replacement, both acetabular and femoral components    | Hip Replacement Revision  | ortho                 |
| Orthopedic Surgery    | 0071              | Revision of hip replacement, acetabular component                      | Hip Replacement Revision  | ortho                 |
| Orthopedic Surgery    | 0072              | Revision of hip replacement, femoral component                         | Hip Replacement Revision  | ortho                 |
| Orthopedic Surgery    | 0073              | Revision of hip replacement, acetabular liner and/or femoral head only | Hip Replacement Revision  | ortho                 |
| Orthopedic Surgery    | 8153              | Revision of hip replacement, not otherwise specified                   | Hip Replacement Revision  | ortho                 |
| Orthopedic Surgery    | 8154              | Total knee replacement                                                 | Knee Replacement          | ortho                 |
| Orthopedic Surgery    | 0080              | Revision of knee replacement, total (all components)                   | Knee Replacement Revision | ortho                 |
| Orthopedic Surgery    | 0081              | Revision of knee replacement, tibial component                         | Knee Replacement Revision | ortho                 |
| Orthopedic Surgery    | 0082              | Revision of knee replacement, femoral component                        | Knee Replacement Revision | ortho                 |
| Orthopedic Surgery    | 0083              | Revision of knee replacement, patellar component                       | Knee Replacement Revision | ortho                 |
| Orthopedic Surgery    | 0084              | Revision of total knee replacement, tibial insert (liner)              | Knee Replacement Revision | ortho                 |
| Orthopedic Surgery    | 8155              | Revision of knee replacement, not otherwise specified                  | Knee Replacement Revision | ortho                 |

**eTable 2. List of Current Procedure Terminology (CPT) Procedure Codes and Categories**

| <b>Surgical Type</b> | <b>Procedure Category</b> | <b>CPT Code</b> | <b>CPT Label</b>                                                                                                                                                                                                 | <b>Broad Category</b> |
|----------------------|---------------------------|-----------------|------------------------------------------------------------------------------------------------------------------------------------------------------------------------------------------------------------------|-----------------------|
| General Surgery      | Adrenalectomy             | 44950           | Appendectomy                                                                                                                                                                                                     | Adrenal               |
| General Surgery      | Adrenalectomy             | 44960           | Appendectomy for ruptured appendix                                                                                                                                                                               | Adrenal               |
| General Surgery      | Adrenalectomy             | 44970           | Laparoscopy, surgical, appendectomy                                                                                                                                                                              | Adrenal               |
| General Surgery      | Adrenalectomy             | 56315           | Laparoscopy, surgical; appendectomy                                                                                                                                                                              | Adrenal               |
| General Surgery      | Adrenalectomy             | 56321           | Laparoscopy, surgical; with adrenalectomy, partial or complete, or exploration of adrenal gland with or without biopsy, transabdominal, lumbar or dorsal                                                         | Adrenal               |
| General Surgery      | Adrenalectomy             | 60540           | Adrenalectomy, partial or complete, or exploration of adrenal gland with or without biopsy                                                                                                                       | Adrenal               |
| General Surgery      | Adrenalectomy             | 60545           | Adrenalectomy, partial or complete, or exploration of adrenal gland with or without biopsy; with excision of adjacent retroperitoneal tumor                                                                      | Adrenal               |
| General Surgery      | Adrenalectomy             | 60550           | Laparoscopy, surgical, with adrenalectomy, partial or complete, or exploration of adrenal gland with or without biopsy                                                                                           | Adrenal               |
| General Surgery      | Adrenalectomy             | 60650           | Laparoscopy, surgical, with adrenalectomy, partial or complete, or exploration of adrenal gland with or without biopsy, transabdominal, lumbar or dorsal                                                         | Adrenal               |
| General Surgery      | Bariatric                 | 43631           | Gastrectomy, partial, distal; with gastroduodenostomy                                                                                                                                                            | Bariatric             |
| General Surgery      | Bariatric                 | 43632           | Gastrectomy, partial, distal; with gastrojejunostomy                                                                                                                                                             | Bariatric             |
| General Surgery      | Bariatric                 | 43633           | Gastrectomy, partial, distal; with Roux-en-Y reconstruction                                                                                                                                                      | Bariatric             |
| General Surgery      | Bariatric                 | 43634           | Gastrectomy, partial, distal; with formation of intestinal pouch                                                                                                                                                 | Bariatric             |
| General Surgery      | Bariatric                 | 43644           | Laparoscopy, surgical, gastric restrictive procedure; with gastric bypass and Roux-en-Y gastroenterostomy (roux limb 150 cm or less)                                                                             | Bariatric             |
| General Surgery      | Bariatric                 | 43645           | Laparoscopy, surgical, gastric restrictive procedure; with gastric bypass and small intestine reconstruction to limit absorption                                                                                 | Bariatric             |
| General Surgery      | Bariatric                 | 43770           | Laparoscopy, surgical, gastric restrictive procedure; placement of adjustable gastric restrictive device (eg, gastric band and subcutaneous port components)                                                     | Bariatric             |
| General Surgery      | Bariatric                 | 43775           | Laparoscopy, surgical, gastric restrictive procedure; longitudinal gastrectomy (ie, sleeve gastrectomy)                                                                                                          | Bariatric             |
| General Surgery      | Bariatric                 | 43842           | Gastric restrictive procedure, without gastric bypass, for morbid obesity; vertical-banded gastroplasty                                                                                                          | Bariatric             |
| General Surgery      | Bariatric                 | 43843           | Gastric restrictive procedure, without gastric bypass, for morbid obesity; other than vertical-banded gastroplasty                                                                                               | Bariatric             |
| General Surgery      | Bariatric                 | 43844           | Gastric bypass, other than with Roux-en-Y gastroenterostomy, for morbid obesity                                                                                                                                  | Bariatric             |
| General Surgery      | Bariatric                 | 43845           | Gastric restrictive procedure with partial gastrectomy, pylorus-preserving duodenoileostomy and ileoileostomy (50 to 100 cm common channel) to limit absorption (biliopancreatic diversion with duodenal switch) | Bariatric             |
| General Surgery      | Bariatric                 | 43846           | Gastric restrictive procedure, with gastric bypass for morbid obesity; with short limb (150 cm or less) Roux-en-Y gastroenterostomy                                                                              | Bariatric             |
| General Surgery      | Bariatric                 | 43847           | Gastric restrictive procedure, with gastric bypass for morbid obesity; with small intestine reconstruction to limit absorption                                                                                   | Bariatric             |
| General Surgery      | Biliary Common Duct       | 47420           | Choledochotomy or choledochostomy with exploration, drainage, or removal of calculus, with or without cholecystotomy; without transduodenal sphincterotomy or sphincteroplasty                                   | HPB                   |
| General Surgery      | Biliary Common Duct       | 47425           | Choledochotomy or choledochostomy with exploration, drainage, or removal of calculus, with or without cholecystotomy; with transduodenal sphincterotomy or sphincteroplasty                                      | HPB                   |
| General Surgery      | Biliary Common Duct       | 47564           | Laparoscopy, surgical; cholecystectomy with exploration of common duct                                                                                                                                           | HPB                   |

| <b>Surgical Type</b> | <b>Procedure Category</b> | <b>CPT Code</b> | <b>CPT Label</b>                                                                                                                             | <b>Broad Category</b> |
|----------------------|---------------------------|-----------------|----------------------------------------------------------------------------------------------------------------------------------------------|-----------------------|
| General Surgery      | Biliary Common Duct       | 47610           | Cholecystectomy with exploration of common duct                                                                                              | HPB                   |
| General Surgery      | Biliary Common Duct       | 47612           | Cholecystectomy with exploration of common duct; with choledochoenterostomy                                                                  | HPB                   |
| General Surgery      | Biliary Common Duct       | 47620           | Cholecystectomy with exploration of common duct; with with transduodenal sphincterotomy or sphincteroplasty, with or without cholangiography | HPB                   |
| General Surgery      | Biliary Common Duct       | 56342           | Laparoscopy, cholecystectomy with exploration of common duct                                                                                 | HPB                   |
| General Surgery      | Biliary Other             | 46324           | Laparoscopy, surgical; cholecystoenterostomy                                                                                                 | HPB                   |
| General Surgery      | Biliary Other             | 47570           | Laparoscopy, surgical; cholecystoenterostomy                                                                                                 | HPB                   |
| General Surgery      | Biliary Other             | 47612           | Cholecystectomy with exploration of common duct; with choledochoenterostomy                                                                  | HPB                   |
| General Surgery      | Biliary Other             | 47720           | Cholecystoenterostomy; direct                                                                                                                | HPB                   |
| General Surgery      | Biliary Other             | 47721           | Cholecystoenterostomy; with gastroenterostomy                                                                                                | HPB                   |
| General Surgery      | Biliary Other             | 47740           | Cholecystoenterostomy; roux-en-y                                                                                                             | HPB                   |
| General Surgery      | Biliary Other             | 47741           | Cholecystoenterostomy; roux-en-y with gastroenterostomy                                                                                      | HPB                   |
| General Surgery      | Biliary Other             | 47760           | Anastomosis, of extrahepatic biliary ducts and gastrointestinal tract                                                                        | HPB                   |
| General Surgery      | Biliary Other             | 47765           | Anastomosis, of intrahepatic biliary ducts and gastrointestinal tract                                                                        | HPB                   |
| General Surgery      | Biliary Other             | 47780           | Anastomosis, roux-en-y, of extrahepatic biliary ducts and gastrointestinal tract                                                             | HPB                   |
| General Surgery      | Biliary Other             | 47785           | Anastomosis, roux-en-y, of intrahepatic biliary ducts and gastrointestinal tract                                                             | HPB                   |
| General Surgery      | Biliary Other             | 56324           | Laparoscopy, surgical; with cholecystoenterostomy                                                                                            | HPB                   |
| General Surgery      | Cholecystectomy           | 47562           | Laparoscopy, surgical; cholecystectomy                                                                                                       | HPB                   |
| General Surgery      | Cholecystectomy           | 47563           | Laparoscopy, surgical; cholecystectomy with cholangiography                                                                                  | HPB                   |
| General Surgery      | Cholecystectomy           | 47600           | Cholecystectomy                                                                                                                              | HPB                   |
| General Surgery      | Cholecystectomy           | 47605           | Cholecystectomy with cholangiography                                                                                                         | HPB                   |
| General Surgery      | Cholecystectomy           | 56340           | Laparoscopy, cholecystectomy (any method)                                                                                                    | HPB                   |
| General Surgery      | Cholecystectomy           | 56341           | Laparoscopy, cholecystectomy with cholangiography                                                                                            | HPB                   |
| General Surgery      | Cholecystectomy           | 56342           | Laparoscopy, cholecystectomy with exploration of common duct                                                                                 | HPB                   |
| General Surgery      | Colectomy Partial - Lap   | 44204           | Laparoscopy, surgical; colectomy, partial, with anastomosis                                                                                  | Bowel                 |
| General Surgery      | Colectomy Partial - Lap   | 44205           | Laparoscopy, surgical; colectomy, partial, with removal of terminal ileum with ileocolostomy                                                 | Bowel                 |
| General Surgery      | Colectomy Partial - Lap   | 44206           | Laparoscopy, surgical; colectomy, partial with end colostomy and closure of distal segment (Hartmann)                                        | Bowel                 |
| General Surgery      | Colectomy Partial - Lap   | 44207           | Laparoscopy, surgical; colectomy, partial, with anastomosis, with coloproctostomy (low pelvic anastomosis)                                   | Bowel                 |
| General Surgery      | Colectomy Partial - Lap   | 44208           | Laparoscopy, surgical; colectomy, partial, with anastomosis, with coloproctostomy (low pelvic anastomosis) with colostomy                    | Bowel                 |
| General Surgery      | Colectomy Partial - Open  | 44130           | Enteroenterostomy, anastomosis of intestine, with or without cutaneous enterostomy (separate procedure)                                      | Bowel                 |

| <b>Surgical Type</b> | <b>Procedure Category</b> | <b>CPT Code</b> | <b>CPT Label</b>                                                                                                                                                      | <b>Broad Category</b> |
|----------------------|---------------------------|-----------------|-----------------------------------------------------------------------------------------------------------------------------------------------------------------------|-----------------------|
| General Surgery      | Colectomy Partial - Open  | 44140           | Colectomy, partial; with anastomosis                                                                                                                                  | Bowel                 |
| General Surgery      | Colectomy Partial - Open  | 44141           | Colectomy, partial; with skin level cecostomy or colostomy                                                                                                            | Bowel                 |
| General Surgery      | Colectomy Partial - Open  | 44143           | Colectomy, partial; with end colostomy and closure of distal segment                                                                                                  | Bowel                 |
| General Surgery      | Colectomy Partial - Open  | 44144           | Colectomy, partial; with colostomy or ileostomy and creation of mucofistula                                                                                           | Bowel                 |
| General Surgery      | Colectomy Partial - Open  | 44145           | Colectomy, partial; with coloproctostomy (low pelvic anastomosis)                                                                                                     | Bowel                 |
| General Surgery      | Colectomy Partial - Open  | 44146           | Colectomy, partial; with coloproctostomy (low pelvic anastomosis) with colostomy                                                                                      | Bowel                 |
| General Surgery      | Colectomy Partial - Open  | 44147           | Colectomy, partial; abdominal and transanal approach                                                                                                                  | Bowel                 |
| General Surgery      | Colectomy Partial - Open  | 44160           | Colectomy, partial, with removal of terminal ileum with ileocolostomy                                                                                                 | Bowel                 |
| General Surgery      | Colectomy Partial - Open  | 44625           | Closure of enterostomy, large or small intestine; with resection and anastomosis other than colorectal                                                                | Bowel                 |
| General Surgery      | Colectomy Partial - Open  | 44626           | Closure of enterostomy, large or small intestine; with resection and colorectal anastomosis (eg, closure of Hartmann type procedure)                                  | Bowel                 |
| General Surgery      | Colectomy Total - Lap     | 44210           | Laparoscopy, surgical; colectomy, total, abdominal, without proctectomy, with ileostomy or ileoproctostomy                                                            | Bowel                 |
| General Surgery      | Colectomy Total - Lap     | 44211           | Laparoscopy, surgical; colectomy, total, abdominal, with proctectomy, with ileoanal anastomosis, creation of ileal reservoir                                          | Bowel                 |
| General Surgery      | Colectomy Total - Lap     | 44212           | Laparoscopy, surgical; colectomy, total, abdominal, with proctectomy, with ileostomy                                                                                  | Bowel                 |
| General Surgery      | Colectomy Total - Open    | 44150           | Colectomy, total, abdominal, without proctectomy; with ileostomy or ileoproctostomy                                                                                   | Bowel                 |
| General Surgery      | Colectomy Total - Open    | 44151           | Colectomy, total, abdominal without proctectomy; with continent ileostomy                                                                                             | Bowel                 |
| General Surgery      | Colectomy Total - Open    | 44152           | Colectomy, total, abdominal, without proctectomy; with rectal mucosectomy, ileoanal anastomosis, with or without loop ileostomy                                       | Bowel                 |
| General Surgery      | Colectomy Total - Open    | 44153           | Colectomy, total, abdominal, without proctectomy; with rectal mucosectomy, ileoanal anastomosis, creation of ileal reservoir (S or J), with or without loop ileostomy | Bowel                 |
| General Surgery      | Colectomy Total - Open    | 44155           | Colectomy, total, abdominal, with proctectomy; with ileostomy                                                                                                         | Bowel                 |
| General Surgery      | Colectomy Total - Open    | 44156           | Colectomy, total, abdominal, with proctectomy; with continent ileostomy                                                                                               | Bowel                 |
| General Surgery      | Colectomy Total - Open    | 44157           | Colectomy, total, abdominal, with proctectomy; with ileoanal anastomosis                                                                                              | Bowel                 |
| General Surgery      | Colectomy Total - Open    | 44158           | Colectomy, total, abdominal, with proctectomy; with ileoanal anastomosis, creation of ileal reservoir                                                                 | Bowel                 |
| General Surgery      | Esophagectomy             | 43107           | Total or near total esophagectomy                                                                                                                                     | UGI                   |
| General Surgery      | Esophagectomy             | 43108           | Esophagectomy with colon interposition                                                                                                                                | UGI                   |
| General Surgery      | Esophagectomy             | 43112           | Esophagectomy with thoracotomy                                                                                                                                        | UGI                   |
| General Surgery      | Esophagectomy             | 43113           | Esophagectomy with thoracotomy and colon interposition                                                                                                                | UGI                   |
| General Surgery      | Esophagectomy             | 43116           | Partial esophagectomy, cervical                                                                                                                                       | UGI                   |
| General Surgery      | Esophagectomy             | 43117           | Partial esophagectomy (Ivor Lewis)                                                                                                                                    | UGI                   |
| General Surgery      | Esophagectomy             | 43118           | Partial esophagectomy (Ivor Lewis) with colon interposition                                                                                                           | UGI                   |
| General Surgery      | Esophagectomy             | 43121           | Partial esophagectomy, distal two-thirds, with thoracotomy only                                                                                                       | UGI                   |

| <b>Surgical Type</b> | <b>Procedure Category</b> | <b>CPT Code</b> | <b>CPT Label</b>                                                                                                                                          | <b>Broad Category</b> |
|----------------------|---------------------------|-----------------|-----------------------------------------------------------------------------------------------------------------------------------------------------------|-----------------------|
| General Surgery      | Esophagectomy             | 43122           | Partial esophagectomy, thoracoabdominal or abdominal approach                                                                                             | UGI                   |
| General Surgery      | Esophagectomy             | 43123           | Partial esophagectomy, thoracoabdominal or abdominal approach, with colon interposition                                                                   | UGI                   |
| General Surgery      | Esophagectomy             | 43124           | Total or partial esophagectomy with cervical esophagostomy                                                                                                | UGI                   |
| General Surgery      | Esophagomyotomy           | 32665           | Thoracoscopy, surgical; with esophagomyotomy (Heller type)                                                                                                | UGI                   |
| General Surgery      | Esophagomyotomy           | 43279           | Laparoscopic esophagomyotomy                                                                                                                              | UGI                   |
| General Surgery      | Esophagomyotomy           | 43279           | Laparoscopy, surgical, esophagomyotomy (Heller type), with fundoplasty, when performed                                                                    | UGI                   |
| General Surgery      | Esophagomyotomy           | 43330           | Esophagomyotomy; abdominal approach                                                                                                                       | UGI                   |
| General Surgery      | Esophagomyotomy           | 43331           | Esophagomyotomy; thoracic approach                                                                                                                        | UGI                   |
| General Surgery      | Hernia Abdominal – Lap    | 49652           | Laparoscopy, surgical, repair, ventral, umbilical, spigelian or epigastric hernia (includes mesh insertion, when performed); reducible                    | Hernia                |
| General Surgery      | Hernia Abdominal – Lap    | 49653           | Laparoscopy, surgical, repair, ventral, umbilical, spigelian or epigastric hernia (includes mesh insertion, when performed); incarcerated or strangulated | Hernia                |
| General Surgery      | Hernia Abdominal – Lap    | 49654           | Laparoscopy, surgical, repair, incisional hernia; reducible                                                                                               | Hernia                |
| General Surgery      | Hernia Abdominal – Lap    | 49655           | Laparoscopy, surgical, repair, incisional hernia (includes mesh insertion, when performed); incarcerated or strangulated                                  | Hernia                |
| General Surgery      | Hernia Abdominal – Lap    | 49656           | Laparoscopy, surgical, repair, recurrent incisional hernia (includes mesh insertion, when performed); reducible                                           | Hernia                |
| General Surgery      | Hernia Abdominal – Lap    | 49657           | Laparoscopy, surgical, repair, recurrent incisional hernia (includes mesh insertion, when performed); incarcerated or strangulated                        | Hernia                |
| General Surgery      | Hernia Abdominal – Open   | 49560           | Repair initial incisional or ventral hernia; reducible                                                                                                    | Hernia                |
| General Surgery      | Hernia Abdominal – Open   | 49561           | Repair initial incisional or ventral hernia; incarcerated or strangulated                                                                                 | Hernia                |
| General Surgery      | Hernia Abdominal – Open   | 49565           | Repair recurrent incisional or ventral hernia; reducible                                                                                                  | Hernia                |
| General Surgery      | Hernia Abdominal – Open   | 49566           | Repair recurrent incisional or ventral hernia; incarcerated or strangulated                                                                               | Hernia                |
| General Surgery      | Hernia Abdominal – Open   | 49570           | Repair epigastric hernia (eg, preperitoneal fat); reducible (separate procedure)                                                                          | Hernia                |
| General Surgery      | Hernia Abdominal – Open   | 49572           | Repair epigastric hernia (eg, preperitoneal fat); incarcerated or strangulated                                                                            | Hernia                |
| General Surgery      | Hernia Abdominal – Open   | 49585           | Repair umbilical hernia, age 5 years or over; reducible                                                                                                   | Hernia                |
| General Surgery      | Hernia Abdominal – Open   | 49587           | Repair umbilical hernia, age 5 years or older; incarcerated or strangulated                                                                               | Hernia                |
| General Surgery      | Hernia Abdominal – Open   | 49590           | Repair spigelian hernia                                                                                                                                   | Hernia                |
| General Surgery      | Hernia Groin – Lap        | 49650           | Laparoscopy, surgical; repair initial inguinal hernia                                                                                                     | hernia                |
| General Surgery      | Hernia Groin – Lap        | 49651           | Laparoscopy, surgical; repair recurrent inguinal hernia                                                                                                   | hernia                |
| General Surgery      | Hernia Groin – Lap        | 56316           | Laparoscopy, surgical; repair of initial inguinal hernia                                                                                                  | hernia                |
| General Surgery      | Hernia Groin – Lap        | 56317           | Laparoscopy, surgical; repair of recurrent inguinal hernia                                                                                                | hernia                |
| General Surgery      | Hernia Groin – Open       | 49505           | Repair initial inguinal hernia, age 5 years or over; reducible                                                                                            | Hernia                |
| General Surgery      | Hernia Groin – Open       | 49507           | Repair initial inguinal hernia, age 5 years or older; incarcerated or strangulated                                                                        | Hernia                |

| <b>Surgical Type</b> | <b>Procedure Category</b> | <b>CPT Code</b> | <b>CPT Label</b>                                                                                                                                          | <b>Broad Category</b> |
|----------------------|---------------------------|-----------------|-----------------------------------------------------------------------------------------------------------------------------------------------------------|-----------------------|
| General Surgery      | Hernia Groin – Open       | 49520           | Repair recurrent inguinal hernia, any age; reducible                                                                                                      | Hernia                |
| General Surgery      | Hernia Groin – Open       | 49521           | Repair recurrent inguinal hernia, any age; incarcerated or strangulated                                                                                   | Hernia                |
| General Surgery      | Hernia Groin – Open       | 49525           | Repair inguinal hernia, sliding, any age                                                                                                                  | Hernia                |
| General Surgery      | Hernia Groin – Open       | 49550           | Repair initial femoral hernia, any age; reducible                                                                                                         | Hernia                |
| General Surgery      | Hernia Groin – Open       | 49553           | Repair initial femoral hernia, any age; incarcerated or strangulated                                                                                      | Hernia                |
| General Surgery      | Hernia Groin – Open       | 49555           | Repair recurrent femoral hernia; reducible                                                                                                                | Hernia                |
| General Surgery      | Hernia Groin – Open       | 49557           | Repair recurrent femoral hernia; incarcerated or strangulated                                                                                             | Hernia                |
| General Surgery      | Large Bowel Other         | 44025           | Colotomy, for exploration, biopsy(s), or foreign body removal                                                                                             | Bowel                 |
| General Surgery      | Large Bowel Other         | 44130           | Enterointerostomy, anastomosis of intestine, with or without cutaneous enterostomy (separate procedure)                                                   | Bowel                 |
| General Surgery      | Large Bowel Other         | 44140           | Colectomy, partial; with anastomosis                                                                                                                      | Bowel                 |
| General Surgery      | Large Bowel Other         | 44145           | Colectomy, partial; with coloproctostomy (low pelvic anastomosis)                                                                                         | Bowel                 |
| General Surgery      | Large Bowel Other         | 44160           | Colectomy, partial, with removal of terminal ileum with ileocolostomy                                                                                     | Bowel                 |
| General Surgery      | Large Bowel Other         | 44205           | Laparoscopy, surgical; colectomy, partial, with removal of terminal ileum with ileocolostomy                                                              | Bowel                 |
| General Surgery      | Large Bowel Other         | 44320           | Colostomy or skin level cecostomy;                                                                                                                        | Bowel                 |
| General Surgery      | Large Bowel Other         | 44604           | Suture of large intestine (colorrhaphy) for perforated ulcer, diverticulum, wound, injury or rupture (single or multiple perforations); without colostomy | Bowel                 |
| General Surgery      | Large Bowel Other         | 44605           | Suture of large intestine for perforated ulcer, diverticulu, wound, injury, or rupture; with colostomy                                                    | Bowel                 |
| General Surgery      | Large Bowel Other         | 44620           | Closure of enterostomy, large or small intestine;                                                                                                         | Bowel                 |
| General Surgery      | Large Bowel Other         | 44625           | Closure of enterostomy, large or small intestine; with resection and anastomosis other than colorectal                                                    | Bowel                 |
| General Surgery      | Large Bowel Other         | 44626           | Closure of enterostomy, large or small intestine; with resection and colorectal anastomosis (eg, closure of Hartmann type procedure)                      | Bowel                 |
| General Surgery      | Large Bowel Other         | 45130           | Excision of rectal procidentia, with anastomosis; perineal approach                                                                                       | Bowel                 |
| General Surgery      | Large Bowel Other         | 45135           | Excision of rectal procidentia, with anastomosis; abdominal and perineal approach                                                                         | Bowel                 |
| General Surgery      | Liver Other               | 47010           | Hepatotomy; for open drainage of abscess or cyst, 1 or 2 stages                                                                                           | HPB                   |
| General Surgery      | Liver Other               | 47015           | Laparotomy, with aspiration and/or injection of hepatic parasitic (eg, amoebic or echinococcal) cyst(s) or abscess(es)                                    | HPB                   |
| General Surgery      | Liver Other               | 47300           | Marsupialization of cyst or abscess of liver                                                                                                              | HPB                   |
| General Surgery      | Liver Other               | 47370           | Laparoscopy, surgical, ablation of 1 or more liver tumor(s); radiofrequency                                                                               | HPB                   |
| General Surgery      | Liver Other               | 47371           | Laparoscopy, surgical, ablation of 1 or more liver tumor(s); cryosurgical                                                                                 | HPB                   |
| General Surgery      | Liver Other               | 47380           | Ablation, open, of 1 or more liver tumor(s); radiofrequency                                                                                               | HPB                   |
| General Surgery      | Liver Other               | 47381           | Ablation, open, of one or more liver tumor(s); cryosurgical                                                                                               | HPB                   |
| General Surgery      | Liver Other               | 49200           | Excision or destruction, open, intra-abdominal or retroperitoneal tumors or cysts or endometriomas;                                                       | HPB                   |

| <b>Surgical Type</b> | <b>Procedure Category</b> | <b>CPT Code</b> | <b>CPT Label</b>                                                                                                                             | <b>Broad Category</b> |
|----------------------|---------------------------|-----------------|----------------------------------------------------------------------------------------------------------------------------------------------|-----------------------|
| General Surgery      | Liver Other               | 49201           | Excision or destruction, open, intra-abdominal or retroperitoneal tumors or cysts or endometriomas; extensive                                | HPB                   |
| General Surgery      | Liver Partial Hepatectomy | 47100           | Biopsy of liver, wedge                                                                                                                       | HPB                   |
| General Surgery      | Liver Partial Hepatectomy | 47120           | Hepatectomy, resection of liver; partial lobectomy                                                                                           | HPB                   |
| General Surgery      | Liver Partial Hepatectomy | 47122           | Hepatectomy, resection of liver; trisegmentectomy                                                                                            | HPB                   |
| General Surgery      | Liver Partial Hepatectomy | 47125           | Hepatectomy, resection of liver; total left lobectomy                                                                                        | HPB                   |
| General Surgery      | Liver Partial Hepatectomy | 47130           | Hepatectomy, resection of liver; total right lobectomy                                                                                       | HPB                   |
| General Surgery      | Lysis of Adhesions        | 44005           | Enterolysis (freeing of intestinal adhesion) (separate procedure)                                                                            | Bowel                 |
| General Surgery      | Lysis of Adhesions        | 44180           | Laparoscopy, surgical, enterolysis (freeing of intestinal adhesion) (separate procedure)                                                     | Bowel                 |
| General Surgery      | Lysis of Adhesions        | 44200           | Laparoscopy, surgical; enterolysis (freeing of intestinal adhesion) (separate procedure)                                                     | Bowel                 |
| General Surgery      | Lysis of Adhesions        | 56304           | Laparoscopy, surgical; with lysis of adhesions (salpingolysis, ovariolysis) (separate procedure)                                             | Bowel                 |
| General Surgery      | Lysis of Adhesions        | 56310           | Laparoscopy, surgical; enterolysis (freeing of intestinal adhesion) (separate procedure)                                                     | Bowel                 |
| General Surgery      | Lysis of Adhesions        | 58660           | Laparoscopy, surgical; with lysis of adhesions (salpingolysis, ovariolysis) (separate procedure)                                             | Bowel                 |
| General Surgery      | Lysis of Adhesions        | 58740           | Lysis of adhesions (salpingolysis, ovariolysis)                                                                                              | Bowel                 |
| General Surgery      | Lysis of Adhesions        | 58985           | Laparoscopy, surgical; with lysis of adhesions                                                                                               | Bowel                 |
| General Surgery      | Mastectomy                | 19180           | Mastectomy, simple, complete                                                                                                                 | Breast                |
| General Surgery      | Mastectomy                | 19182           | Mastectomy, subcutaneous                                                                                                                     | Breast                |
| General Surgery      | Mastectomy                | 19200           | Mastectomy, radical, including pectoral muscles, axillary lymph nodes                                                                        | Breast                |
| General Surgery      | Mastectomy                | 19220           | Mastectomy, radical, including pectoral muscles, axillary and internal mammary lymph nodes (urban type operation)                            | Breast                |
| General Surgery      | Mastectomy                | 19240           | Mastectomy, modified radical, including axillary lymph nodes, with or without pectoralis minor muscle, but excluding pectoralis major muscle | Breast                |
| General Surgery      | Mastectomy                | 19303           | Mastectomy, simple                                                                                                                           | Breast                |
| General Surgery      | Mastectomy                | 19304           | Mastectomy, subcutaneous                                                                                                                     | Breast                |
| General Surgery      | Mastectomy                | 19305           | Mastectomy, radical, including axillary lymph nodes                                                                                          | Breast                |
| General Surgery      | Mastectomy                | 19306           | Mastectomy, radical, including axillary and internal mammary lymph nodes                                                                     | Breast                |
| General Surgery      | Mastectomy                | 19307           | Mastectomy, modified radical                                                                                                                 | Breast                |
| General Surgery      | Pancreatectomy            | 48005           | Resection or debridement of pancreas and peripancreatic tissue for acute necrotizing pancreatitis                                            | HPB                   |
| General Surgery      | Pancreatectomy            | 48105           | Resection or debridement of pancreas and peripancreatic tissue for acute necrotizing pancreatitis                                            | HPB                   |
| General Surgery      | Pancreatectomy            | 48120           | Excision of lesion of pancreas                                                                                                               | HPB                   |
| General Surgery      | Pancreatectomy            | 48140           | Pancreatectomy, distal subtotal, with or without splenectomy; without pancreaticojejunostomy                                                 | HPB                   |
| General Surgery      | Pancreatectomy            | 48145           | Pancreatectomy, distal subtotal, with or without splenectomy; with pancreaticojejunostomy                                                    | HPB                   |



| <b>Surgical Type</b> | <b>Procedure Category</b> | <b>CPT Code</b> | <b>CPT Label</b>                                                                                                                                                                       | <b>Broad Category</b> |
|----------------------|---------------------------|-----------------|----------------------------------------------------------------------------------------------------------------------------------------------------------------------------------------|-----------------------|
| General Surgery      | Pancreatectomy            | 48146           | Pancreatectomy, dista, near-total with preservation of duodenum                                                                                                                        | HPB                   |
| General Surgery      | Pancreatectomy            | 48150           | Pancreatectomy, proximal subtotal (Whipple-type procedure); with pancreatojejunostomy                                                                                                  | HPB                   |
| General Surgery      | Pancreatectomy            | 48152           | Pancreatectomy, proximal subtotal (Whipple-type procedure); without pancreatojejunostomy                                                                                               | HPB                   |
| General Surgery      | Pancreatectomy            | 48153           | Pancreatectomy, proximal subtotal (pylorus-sparing, Whipple-type procedure); with pancreatojejunostomy                                                                                 | HPB                   |
| General Surgery      | Pancreatectomy            | 48154           | Pancreatectomy, proximal subtotal (Whipple-type procedure); without pancreatojejunostomy                                                                                               | HPB                   |
| General Surgery      | Pancreatectomy            | 48155           | Pancreatectomy, total                                                                                                                                                                  | HPB                   |
| General Surgery      | Pancreatectomy            | 48160           | Pancreatectomy, total or subtotal, with autologous transplantation of pancreas or pancreatic islet cells                                                                               | HPB                   |
| General Surgery      | Parathyroidectomy         | 60500           | Parathyroidectomy or exploration of parathyroids                                                                                                                                       | Endocrine             |
| General Surgery      | Parathyroidectomy         | 60502           | Parathyroidectomy or exploration of parathyroids; reexploration                                                                                                                        | Endocrine             |
| General Surgery      | Parathyroidectomy         | 60505           | Parathyroidectomy or exploration of parathyroids; with mediastinal exploration, sternal split or transthoracic approach                                                                | Endocrine             |
| General Surgery      | PD Access Procedure       | 49324           | Laparoscopy, surgical; with insertion of tunneled intraperitoneal catheter                                                                                                             | Bowel                 |
| General Surgery      | PD Access Procedure       | 49419           | Insertion of tunneled intraperitoneal catheter, with subcutaneous port                                                                                                                 | Bowel                 |
| General Surgery      | PD Access Procedure       | 49420           | Insertion of intraperitoneal cannula or catheter for drainage or dialysis; temporary                                                                                                   | Bowel                 |
| General Surgery      | PD Access Procedure       | 49421           | Insertion of tunneled intraperitoneal catheter for dialysis, open                                                                                                                      | Bowel                 |
| General Surgery      | Proctectomy               | 44143           | Colectomy, partial; with end colostomy and closure of distal segment (Hartmann type procedure)                                                                                         | Bowel                 |
| General Surgery      | Proctectomy               | 44145           | Colectomy, partial; with coloproctostomy (low pelvic anastomosis)                                                                                                                      | Bowel                 |
| General Surgery      | Proctectomy               | 44146           | Colectomy, partial; with coloproctostomy (low pelvic anastomosis), with colostomy                                                                                                      | Bowel                 |
| General Surgery      | Proctectomy               | 44147           | Colectomy, partial; abdominal and transanal approach                                                                                                                                   | Bowel                 |
| General Surgery      | Proctectomy               | 44155           | Colectomy, total, abdominal, with proctectomy; with ileostomy                                                                                                                          | Bowel                 |
| General Surgery      | Proctectomy               | 44207           | Laparoscopy, surgical; colectomy, partial, with anastomosis, with coloproctostomy (low pelvic anastomosis)                                                                             | Bowel                 |
| General Surgery      | Proctectomy               | 45110           | Proctectomy; complete, combined abdominoperineal, with colostomy                                                                                                                       | Bowel                 |
| General Surgery      | Proctectomy               | 45111           | Proctectomy; partial resection of rectum, transabdominal approach                                                                                                                      | Bowel                 |
| General Surgery      | Proctectomy               | 45112           | Proctectomy, combined abdominoperineal, pull-through procedure (eg, colo-anal anastomosis)                                                                                             | Bowel                 |
| General Surgery      | Proctectomy               | 45113           | Proctectomy, partial, with rectal mucosectomy, ileoanal anastomosis, creation of ileal reservoir (S or J), with or without loop ileostomy                                              | Bowel                 |
| General Surgery      | Proctectomy               | 45119           | Proctectomy, combined abdominoperineal pull-through procedure (eg, colo-anal anastomosis), with creation of colonic reservoir (eg, J-pouch), with diverting enterostomy when performed | Bowel                 |
| General Surgery      | Proctectomy               | 45120           | Proctectomy, complete, abdominal and perineal approach; with pull-through procedure and anastomosis                                                                                    | Bowel                 |
| General Surgery      | Proctectomy               | 45121           | Proctectomy, complete, abdominal and perineal approach; with subtotal or total colectomy                                                                                               | Bowel                 |
| General Surgery      | Proctectomy               | 45123           | Proctectomy, partial, without anastomosis, perineal approach                                                                                                                           | Bowel                 |
| General Surgery      | Proctectomy               | 45130           | Excision of rectal procidentia, with anastomosis; perineal approach                                                                                                                    | Bowel                 |

| <b>Surgical Type</b> | <b>Procedure Category</b> | <b>CPT Code</b> | <b>CPT Label</b>                                                                                                                     | <b>Broad Category</b> |
|----------------------|---------------------------|-----------------|--------------------------------------------------------------------------------------------------------------------------------------|-----------------------|
| General Surgery      | Proctectomy               | 45395           | Laparoscopy, surgical; proctectomy, complete, combined abdominoperineal, with colostomy                                              | Bowel                 |
| General Surgery      | Proctectomy               | 45397           | Laparoscopy, surgical; proctectomy, combined abdominoperineal pull-through procedure, with colonic reservoir                         | Bowel                 |
| General Surgery      | Proctopexy                | 45400           | Laparoscopy, surgical; proctopexy (for prolapse)                                                                                     | Bowel                 |
| General Surgery      | Proctopexy                | 45402           | Laparoscopy, surgical; proctopexy (for prolapse), with sigmoid resection                                                             | Bowel                 |
| General Surgery      | Proctopexy                | 45505           | Proctoplasty; for prolapse of mucous membrane                                                                                        | Bowel                 |
| General Surgery      | Proctopexy                | 45540           | Proctopexy (eg, for prolapse); abdominal approach                                                                                    | Bowel                 |
| General Surgery      | Proctopexy                | 45541           | Proctopexy (eg, for prolapse); perineal approach                                                                                     | Bowel                 |
| General Surgery      | Proctopexy                | 45550           | Proctopexy with sigmoid resection, abdominal approach                                                                                | Bowel                 |
| General Surgery      | Pyloroplasty              | 43640           | Vagotomy including pyloroplasty, with or without gastrostomy; truncal or selective                                                   | Bowel                 |
| General Surgery      | Pyloroplasty              | 43641           | Vagotomy including pyloroplasty, with or without gastrostomy; parietal cell (highly selective)                                       | Bowel                 |
| General Surgery      | Pyloroplasty              | 43800           | Pyloroplasty                                                                                                                         | Bowel                 |
| General Surgery      | Small Bowel Other         | 44020           | Enterotomy, small intestine, other than duodenum; for exploration, biopsy(s), or foreign body removal                                | Bowel                 |
| General Surgery      | Small Bowel Other         | 44021           | Enterotomy, small intestine, other than duodenum; for decompression (eg, Baker tube)                                                 | Bowel                 |
| General Surgery      | Small Bowel Other         | 44120           | Enterectomy, resection of small intestine; single resection and anastomosis                                                          | Bowel                 |
| General Surgery      | Small Bowel Other         | 44125           | Enterectomy, resection of small intestine; with enterostomy                                                                          | Bowel                 |
| General Surgery      | Small Bowel Other         | 44130           | Enteroenterostomy, anastomosis of intestine, with or without cutaneous enterostomy (separate procedure)                              | Bowel                 |
| General Surgery      | Small Bowel Other         | 44602           | Suture of small intestine (enterorrhaphy) for perforated ulcer, diverticulum, wound, injury or rupture; single perforation           | Bowel                 |
| General Surgery      | Small Bowel Other         | 44603           | Suture of small intestine (enterorrhaphy) for perforated ulcer, diverticulum, wound, injury or rupture; multiple perforations        | Bowel                 |
| General Surgery      | Small Bowel Other         | 44615           | Intestinal stricturoplasty (enterotomy and enterorrhaphy) with or without dilation, for intestinal obstruction                       | Bowel                 |
| General Surgery      | Small Bowel Other         | 44620           | Closure of enterostomy, large or small intestine;                                                                                    | Bowel                 |
| General Surgery      | Small Bowel Other         | 44625           | Closure of enterostomy, large or small intestine; with resection and anastomosis other than colorectal                               | Bowel                 |
| General Surgery      | Small Bowel Other         | 44626           | Closure of enterostomy, large or small intestine; with resection and colorectal anastomosis (eg, closure of Hartmann type procedure) | Bowel                 |
| General Surgery      | Small Bowel Other         | 44640           | Closure of intestinal cutaneous fistula                                                                                              | Bowel                 |
| General Surgery      | Small Bowel Other         | 44661           | Closure of enterovesical fistula; with intestine and/or bladder resection                                                            | Bowel                 |
| General Surgery      | Small Bowel Other         | 45136           | Excision of ileoanal reservoir with ileostomy                                                                                        | Bowel                 |
| General Surgery      | Small Bowel Resection     | 44120           | Enterectomy, resection of small intestine; single resection and anastomosis                                                          | Bowel                 |
| General Surgery      | Small Bowel Resection     | 44125           | Enterectomy, resection of small intestine; with enterostomy                                                                          | Bowel                 |
| General Surgery      | Small Bowel Resection     | 44130           | Enteroenterostomy, anastomosis of intestine, with or without cutaneous enterostomy (separate procedure)                              | Bowel                 |
| General Surgery      | Small Bowel Resection     | 44202           | Laparoscopy, surgical; enterectomy, resection of small intestine, single resection and anastomosis                                   | Bowel                 |

| <b>Surgical Type</b> | <b>Procedure Category</b>              | <b>CPT Code</b> | <b>CPT Label</b>                                                                                                                                            | <b>Broad Category</b> |
|----------------------|----------------------------------------|-----------------|-------------------------------------------------------------------------------------------------------------------------------------------------------------|-----------------------|
| General Surgery      | Small Bowel Resection                  | 44314           | Revision of ileostomy; complicated (reconstruction in-depth) (separate procedure)                                                                           | Bowel                 |
| General Surgery      | Small Bowel Resection                  | 44620           | Closure of enterostomy, large or small intestine;                                                                                                           | Bowel                 |
| General Surgery      | Small Bowel Resection                  | 44625           | Closure of enterostomy, large or small intestine; with resection and anastomosis other than colorectal                                                      | Bowel                 |
| General Surgery      | Small Bowel Resection                  | 56348           | Laparoscopy, surgical; intestinal resection, with anastomosis (intra or extracorporeal)                                                                     | Bowel                 |
| General Surgery      | Splenectomy                            | 38100           | Splenectomy; total (separate procedure)                                                                                                                     | HPB                   |
| General Surgery      | Splenectomy                            | 38120           | Laparoscopy, surgical, splenectomy                                                                                                                          | HPB                   |
| General Surgery      | Splenectomy                            | 56345           | Laparoscopy, surgical; splenectomy                                                                                                                          | HPB                   |
| General Surgery      | Stomach Anti-Reflux                    | 43280           | Laparoscopy, surgical, esophagogastric fundoplasty (eg, Nissen, Toupet procedures)                                                                          | UGI                   |
| General Surgery      | Stomach Anti-Reflux                    | 43324           | Esophagogastric fundoplasty (eg, Nissen, Belsey IV, Hill procedures)                                                                                        | UGI                   |
| General Surgery      | Stomach Anti-Reflux                    | 43325           | Esophagogastric fundoplasty; with fundic patch (Thal-Nissen procedure)                                                                                      | UGI                   |
| General Surgery      | Stomach Anti-Reflux                    | 43326           | Esophagogastric fundoplasty; with gastroplasty (eg, Collis)                                                                                                 | UGI                   |
| General Surgery      | Stomach Anti-Reflux                    | 56349           | Laparoscopy, surgical; esophagogastric fundoplasty (eg, Nissen, Belsey IV, Hill, Toupet procedures)                                                         | UGI                   |
| General Surgery      | Stomach Gastric Bypass (non-bariatric) | 43810           | Gastroduodenostomy                                                                                                                                          | UGI                   |
| General Surgery      | Stomach Gastric Bypass (non-bariatric) | 43820           | Gastrojejunostomy; without vagotomy                                                                                                                         | UGI                   |
| General Surgery      | Stomach Gastric Bypass (non-bariatric) | 43825           | Gastrojejunostomy; with vagotomy, any type                                                                                                                  | UGI                   |
| General Surgery      | Stomach Gastric Bypass (non-bariatric) | 43860           | Revision of gastrojejunal anastomosis (gastrojejunostomy) with reconstruction, with or without partial gastrectomy or intestine resection; without vagotomy | UGI                   |
| General Surgery      | Stomach Other                          | 43500           | Gastrotomy; with exploration or foreign body removal                                                                                                        | UGI                   |
| General Surgery      | Stomach Other                          | 43605           | Biopsy of stomach; by laparotomy                                                                                                                            | UGI                   |
| General Surgery      | Stomach Other                          | 43610           | Excision, local; ulcer or benign tumor of stomach                                                                                                           | UGI                   |
| General Surgery      | Stomach Other                          | 43611           | Excision, local; malignant tumor of stomach                                                                                                                 | UGI                   |
| General Surgery      | Stomach Other                          | 43840           | Gastrorrhaphy, suture of perforated duodenal or gastric ulcer, wound, or injury                                                                             | UGI                   |
| General Surgery      | Stomach Other                          | 43870           | Closure of gastrostomy, surgical                                                                                                                            | UGI                   |
| General Surgery      | Stomach Partial Gastrectomy            | 43630           | Hemigastrectomy or distal subtotal gastrectomy including pyloroplasty, gastroduodenostomy or gastrojejunostomy; without vagotomy                            | UGI                   |
| General Surgery      | Stomach Partial Gastrectomy            | 43631           | Gastrectomy, partial, distal; with gastroduodenostomy                                                                                                       | UGI                   |
| General Surgery      | Stomach Partial Gastrectomy            | 43632           | Gastrectomy, partial, distal; with gastrojejunostomy                                                                                                        | UGI                   |
| General Surgery      | Stomach Partial Gastrectomy            | 43633           | Gastrectomy, partial, distal; with Roux-en-Y reconstruction                                                                                                 | UGI                   |
| General Surgery      | Stomach Partial Gastrectomy            | 43634           | Gastrectomy, partial, distal; with formation of intestinal pouch                                                                                            | UGI                   |

| <b>Surgical Type</b> | <b>Procedure Category</b>   | <b>CPT Code</b> | <b>CPT Label</b>                                                                                                                               | <b>Broad Category</b> |
|----------------------|-----------------------------|-----------------|------------------------------------------------------------------------------------------------------------------------------------------------|-----------------------|
| General Surgery      | Stomach Partial Gastrectomy | 43638           | Gastrectomy, partial, proximal, thoracic or abdominal approach including esophagogastrotomy, with vagotomy;                                    | UGI                   |
| General Surgery      | Stomach Partial Gastrectomy | 43639           | Gastrectomy, partial, proximal, thoracic or abdominal approach including esophagogastrotomy, with vagotomy; with pyloroplasty or pyloromyotomy | UGI                   |
| General Surgery      | Stomach Total Gastrectomy   | 43620           | Gastrectomy, total; with esophagoenterostomy                                                                                                   | UGI                   |
| General Surgery      | Stomach Total Gastrectomy   | 43621           | Gastrectomy, total; with Roux-en-Y reconstruction                                                                                              | UGI                   |
| General Surgery      | Stomach Total Gastrectomy   | 43622           | Gastrectomy, total; with formation of intestinal pouch, any type                                                                               | UGI                   |
| General Surgery      | Stomach Total Gastrectomy   | 43625           | Gastrectomy, total; with repair by intestinal transplant                                                                                       | UGI                   |
| General Surgery      | Thyroidectomy Partial       | 60200           | Excision of cyst or adenoma of thyroid, or transection of isthmus                                                                              | Endocrine             |
| General Surgery      | Thyroidectomy Partial       | 60210           | Partial thyroid lobectomy, unilateral; with or without isthmusectomy                                                                           | Endocrine             |
| General Surgery      | Thyroidectomy Partial       | 60212           | Partial thyroid lobectomy, unilateral; with contralateral subtotal lobectomy, including isthmusectomy                                          | Endocrine             |
| General Surgery      | Thyroidectomy Partial       | 60220           | Total thyroid lobectomy, unilateral; with or without isthmusectomy                                                                             | Endocrine             |
| General Surgery      | Thyroidectomy Partial       | 60225           | Total thyroid lobectomy, unilateral; with contralateral subtotal lobectomy, including isthmusectomy                                            | Endocrine             |
| General Surgery      | Thyroidectomy Partial       | 60245           | Thyroidectomy, subtotal or partial                                                                                                             | Endocrine             |
| General Surgery      | Thyroidectomy Partial       | 60246           | Thyroidectomy, subtotal or partial; with removal of substernal thyroid gland, cervical approach                                                | Endocrine             |
| General Surgery      | Thyroidectomy Substernal    | 60270           | Thyroidectomy, including substernal thyroid; sternal split or transthoracic approach                                                           | Endocrine             |
| General Surgery      | Thyroidectomy Substernal    | 60271           | Thyroidectomy, including substernal thyroid; cervical approach                                                                                 | Endocrine             |
| General Surgery      | Thyroidectomy Total         | 60225           | Total thyroid lobectomy, unilateral; with contralateral subtotal lobectomy, including isthmusectomy                                            | Endocrine             |
| General Surgery      | Thyroidectomy Total         | 60240           | Thyroidectomy, total or complete                                                                                                               | Endocrine             |
| General Surgery      | Thyroidectomy Total         | 60252           | Thyroidectomy, total or subtotal for malignancy; with limited neck dissection                                                                  | Endocrine             |
| General Surgery      | Thyroidectomy Total         | 60254           | Thyroidectomy, total or subtotal for malignancy; with radical neck dissection                                                                  | Endocrine             |
| General Surgery      | Thyroidectomy Total         | 60260           | Thyroidectomy, removal of all remaining thyroid tissue following previous removal of a portion of thyroid                                      | Endocrine             |
| General Surgery      | Thyroidectomy Total         | 60270           | Thyroidectomy, including substernal thyroid; sternal split or transthoracic approach                                                           | Endocrine             |
| General Surgery      | Thyroidectomy Total         | 60271           | Thyroidectomy, including substernal thyroid; cervical approach                                                                                 | Endocrine             |
| General Surgery      | Ulcer                       | 43501           | Gastrotomy; with suture repair of bleeding ulcer                                                                                               | Bowel                 |
| General Surgery      | Ulcer                       | 43502           | Gastrotomy; with suture repair of pre-existing esophagogastric laceration (eg, Mallory-Weiss)                                                  | Bowel                 |
| General Surgery      | Ulcer                       | 43640           | Vagotomy including pyloroplasty, with or without gastrotomy; truncal or selective                                                              | Bowel                 |
| General Surgery      | Ulcer                       | 43840           | Gastrorrhaphy, suture of perforated duodenal or gastric ulcer, wound, or injury                                                                | Bowel                 |
| General Surgery      | Ulcer                       | 44010           | Duodenotomy, for exploration, biopsy(s), or foreign body removal                                                                               | Bowel                 |
| General Surgery      | Ulcer                       | 44600           | Suture of intestine (enterorrhaphy), large or small, for perforated ulcer, diverticulum, wound, injury or rupture; single                      | Bowel                 |
| General Surgery      | Ulcer                       | 44602           | Suture of small intestine (enterorrhaphy) for perforated ulcer, diverticulum, wound, injury or rupture; single perforation                     | Bowel                 |

| <b>Surgical Type</b> | <b>Procedure Category</b> | <b>CPT Code</b> | <b>CPT Label</b>                                                                                                                                                        | <b>Broad Category</b> |
|----------------------|---------------------------|-----------------|-------------------------------------------------------------------------------------------------------------------------------------------------------------------------|-----------------------|
| General Surgery      | Ulcer                     | 44603           | Suture of small intestine (enterorrhaphy) for perforated ulcer, diverticulum, wound, injury or rupture; multiple perforations                                           | Bowel                 |
| General Surgery      | Ulcer                     | 44610           | Suture of intestine (enterorrhaphy), large or small, for perforated ulcer, diverticulum, wound, injury or rupture; multiple                                             | Bowel                 |
| Orthopedic Surgery   | Hip Repair                | 27122           | Acetabuloplasty; resection, femoral head (eg, Girdlestone procedure)                                                                                                    | Ortho                 |
| Orthopedic Surgery   | Hip Repair                | 27125           | Hemiarthroplasty, hip, partial (eg, femoral stem prosthesis, bipolar arthroplasty)                                                                                      | Ortho                 |
| Orthopedic Surgery   | Hip Repair                | 27234           | Treatment of open femoral fracture, proximal end, neck, with uncomplicated soft tissue closure, with manipulation (including skeletal traction)                         | Ortho                 |
| Orthopedic Surgery   | Hip Repair                | 27236           | Open treatment of femoral fracture, proximal end, neck, internal fixation or prosthetic replacement                                                                     | Ortho                 |
| Orthopedic Surgery   | Hip Repair                | 27242           | Treatment of open intertrochanteric, peritrochanteric, or subtrochanteric femoral fracture, with uncomplicated soft tissue closure (including traction)                 | Ortho                 |
| Orthopedic Surgery   | Hip Repair                | 27244           | Treatment of intertrochanteric, peritrochanteric, or subtrochanteric femoral fracture; with plate/screw type implant, with or without cerclage                          | Ortho                 |
| Orthopedic Surgery   | Hip Repair                | 27245           | Treatment of intertrochanteric, peritrochanteric, or subtrochanteric femoral fracture; with intramedullary implant, with or without interlocking screws and/or cerclage | Ortho                 |
| Orthopedic Surgery   | Hip Repair                | 27248           | Open treatment of greater trochanteric fracture, includes internal fixation, when performed                                                                             | Ortho                 |
| Orthopedic Surgery   | Hip Repair                | 27269           | Open treatment of femoral fracture, proximal end, head, includes internal fixation, when performed                                                                      | Ortho                 |
| Orthopedic Surgery   | Hip Repair                | 27506           | Open treatment of femoral shaft fracture, with or without external fixation, with insertion of intramedullary implant, with or without cerclage and/or locking screws   | Ortho                 |
| Orthopedic Surgery   | Hip Repair                | 27507           | Open treatment of femoral shaft fracture with plate/screws, with or without cerclage                                                                                    | Ortho                 |
| Orthopedic Surgery   | Hip Replacement           | 27125           | Hemiarthroplasty, hip, partial (eg, femoral stem prosthesis, bipolar arthroplasty)                                                                                      | Ortho                 |
| Orthopedic Surgery   | Hip Replacement           | 27126           | Partial hip replacement (hemiarthroplasty); cup                                                                                                                         | Ortho                 |
| Orthopedic Surgery   | Hip Replacement           | 27130           | Arthroplasty, acetabular and proximal femoral prosthetic replacement (total hip arthroplasty), with or without autograft or allograft                                   | Ortho                 |
| Orthopedic Surgery   | Hip Replacement           | 27132           | Conversion of previous hip surgery to total hip arthroplasty, with or without autograft or allograft                                                                    | Ortho                 |
| Orthopedic Surgery   | Hip Replacement           | 27236           | Open treatment of femoral fracture, proximal end, neck, internal fixation or prosthetic replacement                                                                     | Ortho                 |
| Orthopedic Surgery   | Hip Replacement Revision  | 27091           | Removal of hip prosthesis; complicated, including total hip prosthesis, methylmethacrylate with or without insertion of spacer                                          | Ortho                 |
| Orthopedic Surgery   | Hip Replacement Revision  | 27132           | Conversion of previous hip surgery to total hip arthroplasty, with or without autograft or allograft                                                                    | Ortho                 |
| Orthopedic Surgery   | Hip Replacement Revision  | 27134           | Revision of total hip arthroplasty; both components, with or without autograft or allograft                                                                             | Ortho                 |
| Orthopedic Surgery   | Hip Replacement Revision  | 27137           | Revision of total hip arthroplasty; acetabular component only, with or without autograft or allograft                                                                   | Ortho                 |
| Orthopedic Surgery   | Hip Replacement Revision  | 27138           | Revision of total hip arthroplasty; femoral component only, with or without allograft                                                                                   | Ortho                 |
| Orthopedic Surgery   | Knee Replacement          | 27440           | Arthroplasty, knee, tibial plateau;                                                                                                                                     | Ortho                 |
| Orthopedic Surgery   | Knee Replacement          | 27441           | Arthroplasty, knee, tibial plateau; with debridement and partial synovectomy                                                                                            | Ortho                 |
| Orthopedic Surgery   | Knee Replacement          | 27442           | Arthroplasty, femoral condyles or tibial plateau(s), knee;                                                                                                              | Ortho                 |
| Orthopedic Surgery   | Knee Replacement          | 27443           | Arthroplasty, femoral condyles or tibial plateau(s), knee; with debridement and partial synovectomy                                                                     | Ortho                 |
| Orthopedic Surgery   | Knee Replacement          | 27445           | Arthroplasty, knee, hinge prosthesis (eg, Walldius type)                                                                                                                | Ortho                 |

| <b>Surgical Type</b> | <b>Procedure Category</b> | <b>CPT Code</b> | <b>CPT Label</b>                                                                                                                       | <b>Broad Category</b> |
|----------------------|---------------------------|-----------------|----------------------------------------------------------------------------------------------------------------------------------------|-----------------------|
| Orthopedic Surgery   | Knee Replacement          | 27446           | Arthroplasty, knee, condyle and plateau; medial OR lateral compartment                                                                 | Ortho                 |
| Orthopedic Surgery   | Knee Replacement          | 27447           | Arthroplasty, knee, condyle and plateau; medial AND lateral compartments with or without patella resurfacing (total knee arthroplasty) | Ortho                 |
| Orthopedic Surgery   | Knee Replacement Revision | 27486           | Revision of total knee arthroplasty, with or without allograft; 1 component                                                            | Ortho                 |
| Orthopedic Surgery   | Knee Replacement Revision | 27487           | Revision of total knee arthroplasty, with or without allograft; femoral and entire tibial component                                    | Ortho                 |
| Orthopedic Surgery   | Knee Replacement Revision | 27488           | Removal of prosthesis, including total knee prosthesis, methylmethacrylate with or without insertion of spacer, knee                   | Ortho                 |

**eTable 3. Patient Selection Summary**

| Exclusion Step                                                                                                                                               | Admissions Retained   |                      |                       | Surgeons Retained |                    | Patients Retained<br>N (%) | Hospitals Retained<br>N (%) |
|--------------------------------------------------------------------------------------------------------------------------------------------------------------|-----------------------|----------------------|-----------------------|-------------------|--------------------|----------------------------|-----------------------------|
|                                                                                                                                                              | Overall<br>N (%)      | New Surgeon<br>N (%) | Exp. Surgeon<br>N (%) | New Surgeons<br>N | Exp. Surgeons<br>N |                            |                             |
| All admissions that occurred between July 1, 2009 and June 30, 2013 and had a qualifying ICD-9 principal procedure code.                                     | 3,964,039<br>(100.0%) | ---                  | ---                   | ---               | ---                | 3,445,111<br>(100.0%)      | 4,850<br>(100.0%)           |
| Exclude admissions with patients who could not be found in the Master Beneficiary Summary File, or who had missing date of birth or sex in the MBSF.         | 3,964,039<br>(100.0%) | ---                  | ---                   | ---               | ---                | 3,445,111<br>(100.0%)      | 4,850<br>(100.0%)           |
| Exclude admissions where patients were under age 65.5 at admission.                                                                                          | 3,325,852<br>(83.9%)  | ---                  | ---                   | ---               | ---                | 2,903,409<br>(84.3%)       | 4,704<br>(97.0%)            |
| Exclude admissions outside the 50 states or District of Columbia.                                                                                            | 3,315,358<br>(83.6%)  | ---                  | ---                   | ---               | ---                | 2,893,902<br>(84.0%)       | 4,691<br>(96.7%)            |
| Exclude admissions with discharge status: still patient.                                                                                                     | 3,313,559<br>(83.6%)  | ---                  | ---                   | ---               | ---                | 2,893,059<br>(84.0%)       | 4,688<br>(96.7%)            |
| Exclude admissions with Medicare status: End-Stage Renal Disease.                                                                                            | 3,313,559<br>(83.6%)  | ---                  | ---                   | ---               | ---                | 2,893,059<br>(84.0%)       | 4,688<br>(96.7%)            |
| Exclude admissions that were not in short-term acute-care hospitals.                                                                                         | 3,240,443<br>(81.7%)  | ---                  | ---                   | ---               | ---                | 2,831,630<br>(82.2%)       | 3,404<br>(70.2%)            |
| Exclude admissions if the patient was in HMO or lacked Part B in the month of admission, the month following, or the 6 months prior to admission.*           | 3,053,095<br>(77.0%)  | ---                  | ---                   | ---               | ---                | 2,667,183<br>(77.4%)       | 3,400<br>(70.1%)            |
| Exclude admissions without Part B CPT operation of interest.                                                                                                 | 2,805,064<br>(70.8%)  | ---                  | ---                   | ---               | ---                | 2,469,059<br>(71.7%)       | 3,383<br>(69.8%)            |
| Exclude admissions whose surgeons were neither new nor experienced in the AMA file.                                                                          | 2,371,411<br>(59.8%)  | 121,016<br>(--)      | 2,250,395<br>(--)     | 4,201             | 30,414             | 2,104,245<br>(61.1%)       | 3,355<br>(69.2%)            |
| Exclude admissions in which a new surgeon was too far removed from their YOT, or YOG, or in which an experienced surgeon was too close to their YOT, or YOG. | 2,180,789<br>(55.0%)  | 101,431<br>(100.0%)  | 2,079,358<br>(100.0%) | 4,131             | 29,851             | 1,944,814<br>(56.5%)       | 3,350<br>(69.1%)            |
| Exclude admissions from a surgeon's minority specialty practice (Gensurg or Orthopedic).                                                                     | 2,180,369<br>(55.0%)  | 101,425<br>(100.0%)  | 2,078,944<br>(100.0%) | 4,131             | 29,851             | 1,944,460<br>(56.4%)       | 3,350<br>(69.1%)            |
| Exclude admissions if a patient saw a surgeon at their non-majority hospital.                                                                                | 1,921,257<br>(48.5%)  | 87,134<br>(85.9%)    | 1,834,123<br>(88.2%)  | 4,131             | 29,851             | 1,722,870<br>(50.0%)       | 3,175<br>(65.5%)            |
| Randomly sample 1 admission per patient.                                                                                                                     | 1,692,429<br>(42.7%)  | 78,735<br>(77.6%)    | 1,613,694<br>(77.6%)  | 4,101             | 29,700             | 1,692,429<br>(49.1%)       | 3,172<br>(65.4%)            |
| Exclude admissions from surgeons that did not have at least 10 cases.                                                                                        | 1,652,900<br>(41.7%)  | 71,001<br>(70.0%)    | 1,581,899<br>(76.1%)  | 2,206             | 20,954             | 1,652,900<br>(48.0%)       | 2,944<br>(60.7%)            |
| Exclude admissions from hospitals that did not have at least 1 new surgeon and at least 1 experienced surgeon.                                               | 762,201<br>(19.2%)    | 68,036<br>(67.1%)    | 694,165<br>(33.4%)    | 2,119             | 8,503              | 762,201<br>(22.1%)         | 1,221<br>(25.2%)            |

\*Month following exclusion does not apply if the patient dies before the end of the month of admission.

**eTable 4. Risk Models for 30-day Mortality** All risk models were estimated using the patients of surgeons who were eligible for study inclusion but whose surgeons did not pair in the surgeon level match. In addition to overall risk models, risk models based only on patient comorbidities were estimated in order to help balance these variables in the patient level matches.

eTable 4a. General Surgery (2009-9/30/2010) Risk Model.

| Covariate                              | Estimate (SE) | Odds Ratio (95% CI) | Chi-Square | P-value |
|----------------------------------------|---------------|---------------------|------------|---------|
| Intercept                              | -4.03 (0.11)  |                     |            |         |
| Age 65-69 (Reference)                  | --            | --                  | --         | --      |
| Age 70-74                              | 0.19 (0.08)   | 1.21 (1.21, 1.41)   | 2.4        | 0.0160  |
| Age 75-79                              | 0.48 (0.08)   | 1.61 (1.61, 1.87)   | 6.2        | <.0001  |
| Age 80-84                              | 0.66 (0.08)   | 1.94 (1.94, 2.25)   | 8.6        | <.0001  |
| Age 85+                                | 1.12 (0.08)   | 3.06 (3.06, 3.56)   | 14.7       | <.0001  |
| Sex (female)                           | -0.12 (0.04)  | 0.89 (0.89, 0.97)   | -2.6       | 0.0090  |
| Emergent Admission                     | 0.66 (0.05)   | 1.93 (1.93, 2.12)   | 13.7       | <.0001  |
| Transfer-in                            | 0.54 (0.09)   | 1.72 (1.72, 2.05)   | 6.0        | <.0001  |
| Past Admission in Last 6 Months        | 0.14 (0.05)   | 1.15 (1.15, 1.26)   | 2.9        | 0.0039  |
| Principal Procedure Categories         |               |                     |            |         |
| Appendectomy                           | -1.50 (0.19)  | 0.22 (0.22, 0.32)   | -8.0       | <.0001  |
| Bariatric                              | -1.86 (0.58)  | 0.16 (0.16, 0.49)   | -3.2       | 0.0014  |
| Biliary common duct                    | -0.54 (0.64)  | 0.58 (0.58, 2.03)   | -0.8       | 0.3963  |
| Biliary other                          | -0.73 (0.29)  | 0.48 (0.48, 0.84)   | -2.6       | 0.0107  |
| Cholecystectomy                        | -1.36 (0.08)  | 0.26 (0.26, 0.30)   | -18.0      | <.0001  |
| Colectomy Partial - Lap                | -1.25 (0.13)  | 0.29 (0.29, 0.37)   | -9.5       | <.0001  |
| Colectomy Partial – Open (Reference)   | --            | --                  | --         | --      |
| Colectomy Total - Lap                  | -0.54 (0.75)  | 0.58 (0.58, 2.54)   | -0.7       | 0.4697  |
| Colectomy Total - Open                 | 0.38 (0.13)   | 1.46 (1.46, 1.87)   | 2.9        | 0.0036  |
| Esophagectomy or Esophagomyotomy       | -0.26 (0.26)  | 0.77 (0.77, 1.29)   | -1.0       | 0.3225  |
| Hernia Abdominal – Lap                 | -1.49 (0.42)  | 0.22 (0.22, 0.51)   | -3.6       | 0.0004  |
| Hernia Abdominal – Open                | -1.16 (0.15)  | 0.31 (0.31, 0.42)   | -7.7       | <.0001  |
| Hernia Groin – Lap                     | -2.64 (1.01)  | 0.07 (0.07, 0.52)   | -2.6       | 0.0089  |
| Hernia Groin – Open                    | -1.36 (0.16)  | 0.26 (0.26, 0.35)   | -8.7       | <.0001  |
| Large Bowel Other                      | -0.49 (0.21)  | 0.61 (0.61, 0.93)   | -2.3       | 0.0215  |
| Liver Partial Hepatectomy              | -0.51 (0.20)  | 0.60 (0.60, 0.89)   | -2.5       | 0.0119  |
| Lysis of Adhesions                     | -0.47 (0.09)  | 0.63 (0.63, 0.75)   | -5.0       | <.0001  |
| Mastectomy                             | -1.84 (0.29)  | 0.16 (0.16, 0.28)   | -6.5       | <.0001  |
| Pancreatectomy                         | -0.74 (0.17)  | 0.48 (0.48, 0.67)   | -4.3       | <.0001  |
| Parathyroidectomy                      | -1.68 (0.34)  | 0.19 (0.19, 0.37)   | -4.9       | <.0001  |
| PD Access Procedure                    | -1.10 (0.27)  | 0.33 (0.33, 0.56)   | -4.1       | <.0001  |
| Proctectomy                            | -0.73 (0.16)  | 0.48 (0.48, 0.65)   | -4.7       | <.0001  |
| Pyloroplasty                           | 0.35 (0.35)   | 1.42 (1.42, 2.81)   | 1.0        | 0.3117  |
| Small Bowel Other                      | -0.06 (0.17)  | 0.94 (0.94, 1.32)   | -0.4       | 0.7149  |
| Small Bowel Resection                  | 0.02 (0.07)   | 1.02 (1.02, 1.16)   | 0.2        | 0.8082  |
| Splenectomy                            | 0.26 (0.18)   | 1.29 (1.29, 1.84)   | 1.4        | 0.1616  |
| Stomach Anti-Reflux                    | -1.31 (0.42)  | 0.27 (0.27, 0.61)   | -3.2       | 0.0016  |
| Stomach Gastric Bypass (non-bariatric) | 0.64 (0.19)   | 1.90 (1.90, 2.76)   | 3.4        | 0.0008  |
| Stomach Other                          | 0.47 (0.26)   | 1.60 (1.60, 2.66)   | 1.8        | 0.0656  |
| Stomach Partial Gastrectomy            | -0.21 (0.15)  | 0.81 (0.81, 1.09)   | -1.4       | 0.1707  |
| Stomach Total Gastrectomy              | 0.33 (0.24)   | 1.39 (1.39, 2.23)   | 1.3        | 0.1779  |
| Thyroidectomy Partial                  | -1.94 (0.51)  | 0.14 (0.14, 0.39)   | -3.8       | 0.0001  |
| Thyroidectomy Total                    | -1.53 (0.36)  | 0.22 (0.22, 0.44)   | -4.2       | <.0001  |
| Ulcer                                  | 0.72 (0.12)   | 2.06 (2.06, 2.63)   | 5.8        | <.0001  |
| Same-Day Secondary Procedures          |               |                     |            |         |
| Major Operative Therapeutic Procedure  | 0.40 (0.05)   | 1.49 (1.49, 1.64)   | 7.9        | <.0001  |
| Comorbidities                          |               |                     |            |         |
| Congestive Heart Failure               | 0.33 (0.05)   | 1.39 (1.39, 1.54)   | 6.5        | <.0001  |
| Past Myocardial Infarction             | 0.00 (0.07)   | 1.00 (1.00, 1.14)   | 0.0        | 0.9724  |
| Past Arrhythmia                        | 0.03 (0.05)   | 1.03 (1.03, 1.13)   | 0.6        | 0.5689  |
| Angina                                 | -0.11 (0.10)  | 0.89 (0.89, 1.08)   | -1.2       | 0.2448  |
| Valvular Disease                       | 0.07 (0.05)   | 1.08 (1.08, 1.18)   | 1.6        | 0.1203  |
| Unstable Angina                        | 0.07 (0.12)   | 1.07 (1.07, 1.35)   | 0.6        | 0.5360  |
| Hypertension                           | -0.35 (0.06)  | 0.71 (0.71, 0.80)   | -5.6       | <.0001  |



| <b>Covariate</b>                     | <b>Estimate (SE)</b> | <b>Odds Ratio (95% CI)</b> | <b>Chi-Square</b> | <b>P-value</b> |
|--------------------------------------|----------------------|----------------------------|-------------------|----------------|
| Diabetes                             | -0.12 (0.05)         | 0.89 (0.89, 0.97)          | -2.5              | 0.0111         |
| Renal Dysfunction                    | 1.37 (0.05)          | 3.95 (3.95, 4.33)          | 29.4              | <.0001         |
| Renal Failure                        | 0.25 (0.07)          | 1.28 (1.28, 1.46)          | 3.8               | 0.0001         |
| Liver Disease                        | 0.42 (0.05)          | 1.53 (1.53, 1.69)          | 7.9               | <.0001         |
| Cancer                               | -0.09 (0.05)         | 0.91 (0.91, 1.00)          | -1.9              | 0.0534         |
| Specific Abdominal Cancer            | 0.41 (0.09)          | 1.51 (1.51, 1.82)          | 4.3               | <.0001         |
| Dementia                             | 0.41 (0.06)          | 1.51 (1.51, 1.69)          | 7.5               | <.0001         |
| Stroke                               | 0.07 (0.07)          | 1.07 (1.07, 1.22)          | 1.1               | 0.2838         |
| Seizure                              | 0.12 (0.14)          | 1.13 (1.13, 1.48)          | 0.9               | 0.3921         |
| Paraplegia                           | 0.17 (0.12)          | 1.18 (1.18, 1.50)          | 1.4               | 0.1716         |
| COPD                                 | 0.38 (0.05)          | 1.46 (1.46, 1.59)          | 8.3               | <.0001         |
| Asthma                               | -0.09 (0.07)         | 0.92 (0.92, 1.06)          | -1.2              | 0.2363         |
| Post-inflammatory Pulmonary Fibrosis | 0.49 (0.09)          | 1.63 (1.63, 1.94)          | 5.6               | <.0001         |
| Hypothyroidism                       | -0.05 (0.05)         | 0.95 (0.95, 1.05)          | -1.0              | 0.3394         |
| Thrombocytopenia                     | 0.14 (0.10)          | 1.15 (1.15, 1.39)          | 1.4               | 0.1613         |
| Collagen Vascular Disease            | 0.12 (0.08)          | 1.13 (1.13, 1.32)          | 1.4               | 0.1560         |
| Chronic Peptic Ulcer                 | 0.67 (0.25)          | 1.94 (1.94, 3.15)          | 2.7               | 0.0069         |
| Coagulopathy                         | -0.16 (0.28)         | 0.85 (0.85, 1.48)          | -0.6              | 0.5682         |
| Other Coagulopathy                   | 0.49 (0.07)          | 1.63 (1.63, 1.87)          | 7.1               | <.0001         |
| Cushing's Disease                    | -0.17 (0.65)         | 0.85 (0.85, 3.00)          | -0.3              | 0.7953         |
| Graves' Disease                      | -0.24 (0.42)         | 0.79 (0.79, 1.78)          | -0.6              | 0.5712         |
| Summary Statistics                   |                      |                            |                   |                |
| Number of Observations               | 53,021               |                            |                   |                |
| Number of Deaths                     | 2,838                |                            |                   |                |
| C-statistic                          | 0.859                |                            |                   |                |

**eTable 4b. General Surgery (2009-9/30/2010) Risk Model (Comorbidities Only).**

| Covariate                            | Estimate (SE) | Odds Ratio (95% CI) | Chi-Square | P-value |
|--------------------------------------|---------------|---------------------|------------|---------|
| Intercept                            | -3.81 (0.06)  |                     |            |         |
| Congestive Heart Failure             | 0.43 (0.05)   | 1.53 (1.53, 1.68)   | 8.8        | <.0001  |
| Past Myocardial Infarction           | -0.05 (0.06)  | 0.95 (0.95, 1.08)   | -0.7       | 0.4645  |
| Past Arrhythmia                      | 0.08 (0.05)   | 1.08 (1.08, 1.18)   | 1.7        | 0.0815  |
| Angina                               | -0.16 (0.09)  | 0.85 (0.85, 1.02)   | -1.7       | 0.0811  |
| Valvular Disease                     | 0.18 (0.05)   | 1.20 (1.20, 1.31)   | 4.0        | 0.0001  |
| Unstable Angina                      | 0.02 (0.11)   | 1.02 (1.02, 1.28)   | 0.2        | 0.8298  |
| Hypertension                         | -0.34 (0.06)  | 0.71 (0.71, 0.80)   | -5.7       | <.0001  |
| Diabetes                             | -0.25 (0.04)  | 0.78 (0.78, 0.84)   | -5.8       | <.0001  |
| Renal Dysfunction                    | 1.73 (0.05)   | 5.66 (5.66, 6.18)   | 38.4       | <.0001  |
| Renal Failure                        | 0.08 (0.06)   | 1.09 (1.09, 1.22)   | 1.4        | 0.1685  |
| Liver Disease                        | 0.30 (0.05)   | 1.35 (1.35, 1.49)   | 5.9        | <.0001  |
| Cancer                               | 0.05 (0.04)   | 1.05 (1.05, 1.14)   | 1.1        | 0.2593  |
| Specific Abdominal Cancer            | 0.36 (0.08)   | 1.44 (1.44, 1.67)   | 4.7        | <.0001  |
| Dementia                             | 0.70 (0.05)   | 2.01 (2.01, 2.23)   | 13.4       | <.0001  |
| Stroke                               | 0.07 (0.06)   | 1.07 (1.07, 1.22)   | 1.1        | 0.2629  |
| Seizure                              | 0.12 (0.13)   | 1.12 (1.12, 1.46)   | 0.9        | 0.3846  |
| Paraplegia                           | 0.19 (0.12)   | 1.21 (1.21, 1.53)   | 1.7        | 0.0937  |
| COPD                                 | 0.46 (0.04)   | 1.58 (1.58, 1.72)   | 10.6       | <.0001  |
| Asthma                               | -0.17 (0.07)  | 0.84 (0.84, 0.96)   | -2.5       | 0.0136  |
| Post-inflammatory Pulmonary Fibrosis | 0.49 (0.08)   | 1.63 (1.63, 1.92)   | 5.9        | <.0001  |
| Hypothyroidism                       | -0.04 (0.05)  | 0.96 (0.96, 1.05)   | -0.9       | 0.3797  |
| Thrombocytopenia                     | 0.20 (0.09)   | 1.22 (1.22, 1.46)   | 2.2        | 0.0287  |
| Collagen Vascular Disease            | 0.13 (0.08)   | 1.14 (1.14, 1.33)   | 1.7        | 0.0982  |
| Chronic Peptic Ulcer                 | 1.02 (0.23)   | 2.77 (2.77, 4.35)   | 4.4        | <.0001  |
| Coagulopathy                         | -0.01 (0.27)  | 0.99 (0.99, 1.67)   | 0.0        | 0.9631  |
| Other Coagulopathy                   | 0.59 (0.07)   | 1.80 (1.80, 2.05)   | 9.0        | <.0001  |
| Cushing's Disease                    | -0.11 (0.62)  | 0.90 (0.90, 3.02)   | -0.2       | 0.8585  |
| Graves' Disease                      | -0.70 (0.39)  | 0.50 (0.50, 1.07)   | -1.8       | 0.0757  |
| Hemoglobin Disorder                  | 0.38 (1.08)   | 1.46 (1.46, 12.13)  | 0.3        | 0.7288  |
| Summary Statistics                   |               |                     |            |         |
| Number of Observations               | 53,021        |                     |            |         |
| Number of Deaths                     | 2,838         |                     |            |         |
| C-statistic                          | 0.792         |                     |            |         |

**eTable 4c. Orthopedics (2009-9/30/2010) Risk Model.**

| Covariate                             | Estimate (SE) | Odds Ratio (95% CI) | Chi-Square | P-value |
|---------------------------------------|---------------|---------------------|------------|---------|
| Intercept                             | -5.93 (0.25)  |                     |            |         |
| Age 65-69 (Reference)                 | --            | --                  | --         | --      |
| Age 70-74                             | 0.13 (0.15)   | 1.14 (1.14, 1.54)   | 0.9        | 0.3754  |
| Age 75-79                             | 0.64 (0.14)   | 1.89 (1.89, 2.48)   | 4.7        | <.0001  |
| Age 80-84                             | 1.03 (0.13)   | 2.81 (2.81, 3.63)   | 7.8        | <.0001  |
| Age 85+                               | 1.60 (0.13)   | 4.93 (4.93, 6.34)   | 12.4       | <.0001  |
| Sex (Female)                          | -0.44 (0.05)  | 0.64 (0.64, 0.71)   | -8.4       | <.0001  |
| Emergent Admission                    | 0.54 (0.06)   | 1.71 (1.71, 1.93)   | 8.9        | <.0001  |
| Transfer-in                           | 0.30 (0.17)   | 1.35 (1.35, 1.90)   | 1.8        | 0.0773  |
| Past Admission in Last 6 Months       | -0.06 (0.06)  | 0.94 (0.94, 1.06)   | -0.9       | 0.3449  |
| Principal Procedure Categories        |               |                     |            |         |
| Hip Repair                            | 1.20 (0.23)   | 3.32 (3.32, 5.20)   | 5.3        | <.0001  |
| Hip Replacement                       | 0.96 (0.22)   | 2.60 (2.60, 4.04)   | 4.3        | <.0001  |
| Hip Replacement Revision              | 0.23 (0.27)   | 1.26 (1.26, 2.15)   | 0.8        | 0.4068  |
| Knee Replacement                      | -0.25 (0.23)  | 0.78 (0.78, 1.23)   | -1.1       | 0.2822  |
| Knee Replacement Revision (Reference) | --            | --                  | --         | --      |
| Same-Day Secondary Procedures         |               |                     |            |         |
| Major Operative Therapeutic Procedure | 0.35 (0.10)   | 1.42 (1.42, 1.71)   | 3.7        | 0.0003  |
| Comorbidities                         |               |                     |            |         |
| Congestive Heart Failure              | 0.55 (0.06)   | 1.74 (1.74, 1.94)   | 9.6        | <.0001  |
| Past Myocardial Infarction            | 0.21 (0.08)   | 1.24 (1.24, 1.44)   | 2.7        | 0.0080  |
| Past Arrhythmia                       | 0.00 (0.06)   | 1.00 (1.00, 1.11)   | 0.0        | 0.9804  |
| Angina                                | -0.37 (0.14)  | 0.69 (0.69, 0.91)   | -2.6       | 0.0091  |
| Valvular Disease                      | 0.20 (0.05)   | 1.22 (1.22, 1.36)   | 3.7        | 0.0002  |
| Unstable Angina                       | 0.06 (0.18)   | 1.06 (1.06, 1.50)   | 0.4        | 0.7198  |
| Hypertension                          | -0.40 (0.07)  | 0.67 (0.67, 0.76)   | -5.8       | <.0001  |
| Diabetes                              | -0.13 (0.06)  | 0.88 (0.88, 0.98)   | -2.2       | 0.0253  |
| Renal Dysfunction                     | 0.84 (0.06)   | 2.31 (2.31, 2.59)   | 14.8       | <.0001  |
| Renal Failure                         | 0.17 (0.09)   | 1.19 (1.19, 1.42)   | 1.8        | 0.0648  |
| Liver Disease                         | 0.59 (0.11)   | 1.80 (1.80, 2.21)   | 5.5        | <.0001  |
| Cancer                                | 0.05 (0.06)   | 1.05 (1.05, 1.18)   | 0.9        | 0.3582  |
| Specific Abdominal Cancer             | 0.77 (0.28)   | 2.16 (2.16, 3.75)   | 2.8        | 0.0058  |
| Dementia                              | 0.86 (0.05)   | 2.37 (2.37, 2.64)   | 16.0       | <.0001  |
| Stroke                                | 0.11 (0.07)   | 1.11 (1.11, 1.27)   | 1.6        | 0.1124  |
| Seizure                               | 0.23 (0.13)   | 1.25 (1.25, 1.63)   | 1.7        | 0.0928  |
| Paraplegia                            | 0.07 (0.14)   | 1.07 (1.07, 1.41)   | 0.5        | 0.6076  |
| COPD                                  | 0.40 (0.05)   | 1.49 (1.49, 1.66)   | 7.4        | <.0001  |
| Asthma                                | -0.29 (0.10)  | 0.75 (0.75, 0.92)   | -2.8       | 0.0046  |
| Post-inflammatory Pulmonary Fibrosis  | 0.36 (0.11)   | 1.43 (1.43, 1.76)   | 3.3        | 0.0009  |
| Hypothyroidism                        | -0.11 (0.06)  | 0.89 (0.89, 1.00)   | -2.0       | 0.0440  |
| Thrombocytopenia                      | 0.21 (0.13)   | 1.23 (1.23, 1.60)   | 1.5        | 0.1245  |
| Collagen Vascular Disease             | -0.35 (0.11)  | 0.70 (0.70, 0.88)   | -3.1       | 0.0021  |
| Coagulopathy                          | 0.02 (0.33)   | 1.02 (1.02, 1.95)   | 0.1        | 0.9444  |
| Other Coagulopathy                    | 0.17 (0.10)   | 1.18 (1.18, 1.44)   | 1.7        | 0.0944  |
| Cushing's Disease                     | 1.09 (0.87)   | 2.97 (2.97, 16.21)  | 1.3        | 0.2077  |
| Graves' Disease                       | 0.02 (0.52)   | 1.02 (1.02, 2.83)   | 0.0        | 0.9711  |
| Summary Statistics                    |               |                     |            |         |
| Number of Observations                | 110,509       |                     |            |         |
| Number of Deaths                      | 1,919         |                     |            |         |
| C-statistic                           | 0.887         |                     |            |         |

**eTable 4d. Orthopedics (2009-9/30/2010) Risk Model (Comorbidities Only).**

| Covariate                            | Estimate (SE) | Odds Ratio (95% CI) | Chi-Square | P-value |
|--------------------------------------|---------------|---------------------|------------|---------|
| Intercept                            | -4.72 (0.07)  | 0.01 (0.01, 0.01)   | -69.4      | <.0001  |
| Congestive Heart Failure             | 0.87 (0.06)   | 2.38 (2.38, 2.66)   | 15.1       | <.0001  |
| Past Myocardial Infarction           | 0.20 (0.08)   | 1.22 (1.22, 1.42)   | 2.5        | 0.0118  |
| Past Arrhythmia                      | 0.02 (0.05)   | 1.03 (1.03, 1.14)   | 0.5        | 0.6458  |
| Angina                               | -0.41 (0.14)  | 0.66 (0.66, 0.88)   | -2.9       | 0.0039  |
| Valvular Disease                     | 0.35 (0.05)   | 1.41 (1.41, 1.57)   | 6.4        | <.0001  |
| Unstable Angina                      | 0.07 (0.17)   | 1.07 (1.07, 1.51)   | 0.4        | 0.6912  |
| Hypertension                         | -0.46 (0.07)  | 0.63 (0.63, 0.72)   | -6.7       | <.0001  |
| Diabetes                             | -0.29 (0.06)  | 0.75 (0.75, 0.84)   | -5.2       | <.0001  |
| Renal Dysfunction                    | 1.08 (0.06)   | 2.95 (2.95, 3.29)   | 19.3       | <.0001  |
| Renal Failure                        | 0.17 (0.09)   | 1.19 (1.19, 1.42)   | 1.9        | 0.0596  |
| Liver Disease                        | 0.46 (0.10)   | 1.59 (1.59, 1.95)   | 4.5        | <.0001  |
| Cancer                               | 0.15 (0.05)   | 1.16 (1.16, 1.29)   | 2.7        | 0.0065  |
| Specific Abdominal Cancer            | 0.97 (0.28)   | 2.65 (2.65, 4.57)   | 3.5        | 0.0005  |
| Dementia                             | 1.73 (0.05)   | 5.64 (5.64, 6.22)   | 34.4       | <.0001  |
| Stroke                               | 0.15 (0.07)   | 1.16 (1.16, 1.33)   | 2.2        | 0.0261  |
| Seizure                              | 0.23 (0.13)   | 1.26 (1.26, 1.64)   | 1.7        | 0.0834  |
| Paraplegia                           | 0.12 (0.14)   | 1.13 (1.13, 1.48)   | 0.9        | 0.3855  |
| COPD                                 | 0.51 (0.05)   | 1.66 (1.66, 1.84)   | 9.5        | <.0001  |
| Asthma                               | -0.55 (0.10)  | 0.57 (0.57, 0.70)   | -5.6       | <.0001  |
| Post-inflammatory Pulmonary Fibrosis | 0.49 (0.11)   | 1.62 (1.62, 2.00)   | 4.5        | <.0001  |
| Hypothyroidism                       | -0.11 (0.06)  | 0.89 (0.89, 1.00)   | -2.0       | 0.0406  |
| Thrombocytopenia                     | 0.21 (0.13)   | 1.23 (1.23, 1.60)   | 1.5        | 0.1224  |
| Collagen Vascular Disease            | -0.58 (0.11)  | 0.56 (0.56, 0.70)   | -5.2       | <.0001  |
| Chronic Peptic Ulcer                 | -0.33 (1.02)  | 0.72 (0.72, 5.34)   | -0.3       | 0.7445  |
| Coagulopathy                         | 0.04 (0.33)   | 1.04 (1.04, 1.97)   | 0.1        | 0.8957  |
| Other Coagulopathy                   | 0.11 (0.10)   | 1.11 (1.11, 1.35)   | 1.1        | 0.2828  |
| Cushing's Disease                    | 0.94 (0.84)   | 2.56 (2.56, 13.37)  | 1.1        | 0.2645  |
| Graves' Disease                      | -0.33 (0.52)  | 0.72 (0.72, 1.98)   | -0.6       | 0.5206  |
| Summary Statistics                   |               |                     |            |         |
| Number of Observations               | 110,509       |                     |            |         |
| Number of Deaths                     | 1,919         |                     |            |         |
| C-statistic                          | 0.836         |                     |            |         |

**eTable 4e. General Surgery (10/1/2010-2013) Risk Model.**

| Covariate                              | Estimate (SE) | Odds Ratio (95% CI) | Chi-Square | P-value |
|----------------------------------------|---------------|---------------------|------------|---------|
| Intercept                              | -4.20 (0.08)  |                     |            |         |
| Age 65-69 (Reference)                  | --            | --                  | --         | --      |
| Age 70-74                              | 0.17 (0.05)   | 1.18 (1.18, 1.32)   | 3.1        | 0.0021  |
| Age 75-79                              | 0.43 (0.05)   | 1.54 (1.54, 1.71)   | 8.2        | <.0001  |
| Age 80-84                              | 0.71 (0.05)   | 2.04 (2.04, 2.26)   | 13.4       | <.0001  |
| Age 85+                                | 1.09 (0.05)   | 2.98 (2.98, 3.30)   | 20.8       | <.0001  |
| Sex (female)                           | -0.05 (0.03)  | 0.95 (0.95, 1.01)   | -1.6       | 0.1145  |
| Emergent Admission                     | 0.60 (0.03)   | 1.82 (1.82, 1.94)   | 18.1       | <.0001  |
| Transfer-in                            | 0.62 (0.06)   | 1.86 (1.86, 2.10)   | 10.0       | <.0001  |
| Past Admission in Last 6 Months        | 0.05 (0.03)   | 1.05 (1.05, 1.12)   | 1.4        | 0.1625  |
| <b>Principal Procedure Categories</b>  |               |                     |            |         |
| Adrenalectomy                          | -1.74 (0.59)  | 0.18 (0.18, 0.56)   | -2.9       | 0.0034  |
| Appendectomy                           | -1.49 (0.13)  | 0.23 (0.23, 0.29)   | -11.1      | <.0001  |
| Bariatric                              | -1.83 (0.38)  | 0.16 (0.16, 0.34)   | -4.8       | <.0001  |
| Biliary common duct                    | -0.57 (0.50)  | 0.57 (0.57, 1.50)   | -1.1       | 0.2516  |
| Biliary other                          | -0.52 (0.21)  | 0.60 (0.60, 0.90)   | -2.5       | 0.0134  |
| Cholecystectomy                        | -1.31 (0.05)  | 0.27 (0.27, 0.30)   | -24.7      | <.0001  |
| Colectomy Partial - Lap                | -1.13 (0.08)  | 0.32 (0.32, 0.38)   | -14.0      | <.0001  |
| Colectomy Partial - Open (Reference)   | --            | --                  | --         | --      |
| Colectomy Total - Lap                  | -0.43 (0.44)  | 0.65 (0.65, 1.52)   | -1.0       | 0.3196  |
| Colectomy Total - Open                 | 0.71 (0.08)   | 2.04 (2.04, 2.40)   | 8.6        | <.0001  |
| Esophagectomy or Esophagomyotomy       | -0.44 (0.21)  | 0.64 (0.64, 0.97)   | -2.1       | 0.0346  |
| Hernia Abdominal - Lap                 | -1.24 (0.26)  | 0.29 (0.29, 0.48)   | -4.8       | <.0001  |
| Hernia Abdominal - Open                | -0.90 (0.10)  | 0.41 (0.41, 0.49)   | -9.4       | <.0001  |
| Hernia Groin - Lap                     | -1.71 (0.46)  | 0.18 (0.18, 0.44)   | -3.7       | 0.0002  |
| Hernia Groin - Open                    | -1.24 (0.11)  | 0.29 (0.29, 0.35)   | -11.8      | <.0001  |
| Large Bowel Other                      | -0.01 (0.14)  | 0.99 (0.99, 1.31)   | -0.1       | 0.9564  |
| Liver Procedures                       | -0.81 (0.52)  | 0.44 (0.44, 1.24)   | -1.6       | 0.1210  |
| Liver Partial Hepatectomy              | -0.87 (0.16)  | 0.42 (0.42, 0.58)   | -5.4       | <.0001  |
| Lysis of Adhesions                     | -0.49 (0.07)  | 0.61 (0.61, 0.70)   | -7.3       | <.0001  |
| Mastectomy                             | -1.71 (0.19)  | 0.18 (0.18, 0.27)   | -8.8       | <.0001  |
| Pancreatectomy                         | -0.75 (0.11)  | 0.47 (0.47, 0.59)   | -6.6       | <.0001  |
| Parathyroidectomy                      | -2.15 (0.34)  | 0.12 (0.12, 0.23)   | -6.3       | <.0001  |
| PD Access Procedure                    | -0.78 (0.18)  | 0.46 (0.46, 0.66)   | -4.3       | <.0001  |
| Proctectomy                            | -0.75 (0.11)  | 0.47 (0.47, 0.58)   | -7.1       | <.0001  |
| Proctopexy                             | -2.32 (1.01)  | 0.10 (0.10, 0.71)   | -2.3       | 0.0213  |
| Pyloroplasty                           | 0.05 (0.33)   | 1.05 (1.05, 1.99)   | 0.1        | 0.8861  |
| Small Bowel Other                      | -0.34 (0.14)  | 0.71 (0.71, 0.94)   | -2.4       | 0.0165  |
| Small Bowel Resection                  | 0.12 (0.05)   | 1.13 (1.13, 1.23)   | 2.6        | 0.0106  |
| Splenectomy                            | 0.13 (0.13)   | 1.14 (1.14, 1.48)   | 1.0        | 0.3320  |
| Stomach Anti-Reflux                    | -1.24 (0.36)  | 0.29 (0.29, 0.59)   | -3.4       | 0.0006  |
| Stomach Gastric Bypass (non-bariatric) | 0.49 (0.14)   | 1.63 (1.63, 2.14)   | 3.5        | 0.0004  |
| Stomach Other                          | 0.31 (0.19)   | 1.36 (1.36, 1.96)   | 1.7        | 0.0971  |
| Stomach Partial Gastrectomy            | 0.00 (0.10)   | 1.00 (1.00, 1.22)   | 0.0        | 0.9677  |
| Stomach Total Gastrectomy              | 0.04 (0.20)   | 1.04 (1.04, 1.55)   | 0.2        | 0.8595  |
| Thyroidectomy Partial                  | -2.36 (0.50)  | 0.09 (0.09, 0.25)   | -4.7       | <.0001  |
| Thyroidectomy Substernal               | -1.55 (0.72)  | 0.21 (0.21, 0.86)   | -2.2       | 0.0298  |
| Thyroidectomy Total                    | -2.25 (0.38)  | 0.11 (0.11, 0.22)   | -5.9       | <.0001  |
| Ulcer                                  | 0.46 (0.09)   | 1.59 (1.59, 1.89)   | 5.3        | <.0001  |
| <b>Same-Day Secondary Procedures</b>   |               |                     |            |         |
| Major Operative Therapeutic Procedure  | 0.31 (0.03)   | 1.37 (1.37, 1.47)   | 9.0        | <.0001  |
| <b>Comorbidities</b>                   |               |                     |            |         |
| Congestive Heart Failure               | 0.36 (0.03)   | 1.43 (1.43, 1.53)   | 10.3       | <.0001  |
| Past Myocardial Infarction             | 0.05 (0.04)   | 1.05 (1.05, 1.14)   | 1.2        | 0.2285  |
| Past Arrhythmia                        | 0.04 (0.03)   | 1.04 (1.04, 1.11)   | 1.2        | 0.2275  |
| Angina                                 | -0.29 (0.07)  | 0.75 (0.75, 0.86)   | -4.0       | 0.0001  |
| Valvular Disease                       | 0.15 (0.03)   | 1.16 (1.16, 1.24)   | 4.6        | <.0001  |
| Unstable Angina                        | 0.18 (0.08)   | 1.20 (1.20, 1.40)   | 2.2        | 0.0266  |
| Hypertension                           | -0.22 (0.05)  | 0.80 (0.80, 0.88)   | -4.5       | <.0001  |
| Diabetes                               | -0.08 (0.03)  | 0.92 (0.92, 0.98)   | -2.7       | 0.0072  |

| <b>Covariate</b>                     | <b>Estimate (SE)</b> | <b>Odds Ratio (95% CI)</b> | <b>Chi-Square</b> | <b>P-value</b> |
|--------------------------------------|----------------------|----------------------------|-------------------|----------------|
| Renal Dysfunction                    | 1.18 (0.03)          | 3.25 (3.25, 3.46)          | 36.1              | <.0001         |
| Renal Failure                        | 0.29 (0.04)          | 1.34 (1.34, 1.46)          | 6.5               | <.0001         |
| Liver Disease                        | 0.34 (0.04)          | 1.40 (1.40, 1.51)          | 9.2               | <.0001         |
| Cancer                               | -0.02 (0.03)         | 0.98 (0.98, 1.05)          | -0.6              | 0.5816         |
| Specific Abdominal Cancer            | 0.54 (0.07)          | 1.71 (1.71, 1.95)          | 8.0               | <.0001         |
| Dementia                             | 0.38 (0.04)          | 1.46 (1.46, 1.57)          | 10.1              | <.0001         |
| Stroke                               | -0.02 (0.04)         | 0.98 (0.98, 1.07)          | -0.4              | 0.6788         |
| Seizure                              | 0.37 (0.08)          | 1.44 (1.44, 1.70)          | 4.4               | <.0001         |
| Paraplegia                           | 0.33 (0.08)          | 1.40 (1.40, 1.63)          | 4.3               | <.0001         |
| COPD                                 | 0.42 (0.03)          | 1.51 (1.51, 1.61)          | 13.2              | <.0001         |
| Asthma                               | -0.10 (0.05)         | 0.91 (0.91, 1.00)          | -2.0              | 0.0458         |
| Post-inflammatory Pulmonary Fibrosis | 0.32 (0.06)          | 1.37 (1.37, 1.55)          | 5.2               | <.0001         |
| Hypothyroidism                       | -0.05 (0.03)         | 0.95 (0.95, 1.02)          | -1.4              | 0.1724         |
| Thrombocytopenia                     | 0.18 (0.06)          | 1.20 (1.20, 1.35)          | 3.0               | 0.0026         |
| Collagen Vascular Disease            | 0.05 (0.06)          | 1.05 (1.05, 1.17)          | 0.9               | 0.3538         |
| Chronic Peptic Ulcer                 | 0.24 (0.20)          | 1.27 (1.27, 1.89)          | 1.2               | 0.2286         |
| Coagulopathy                         | -0.06 (0.18)         | 0.94 (0.94, 1.34)          | -0.3              | 0.7439         |
| Other Coagulopathy                   | 0.67 (0.05)          | 1.95 (1.95, 2.14)          | 14.4              | <.0001         |
| Cushing's Disease                    | 0.46 (0.36)          | 1.59 (1.59, 3.22)          | 1.3               | 0.1979         |
| Graves' Disease                      | -0.40 (0.28)         | 0.67 (0.67, 1.16)          | -1.4              | 0.1549         |
| Hemoglobin Disorder                  | -0.39 (0.75)         | 0.67 (0.67, 2.95)          | -0.5              | 0.6015         |
| Summary Statistics                   |                      |                            |                   |                |
| Number of Observations               | 113,644              |                            |                   |                |
| Number of Deaths                     | 5,779                |                            |                   |                |
| C-statistic                          | 0.851                |                            |                   |                |

**eTable 4f. General Surgery (10/1/2010-2013) Risk Model (Comorbidities Only Model).**

| Covariate                            | Estimate (SE) | Odds Ratio (95% CI) | Chi-Square | P-value |
|--------------------------------------|---------------|---------------------|------------|---------|
| Intercept                            | -4.04 (0.05)  |                     |            |         |
| Congestive Heart Failure             | 0.45 (0.03)   | 1.58 (1.58, 1.68)   | 13.5       | <.0001  |
| Past Myocardial Infarction           | -0.02 (0.04)  | 0.98 (0.98, 1.06)   | -0.4       | 0.6672  |
| Past Arrhythmia                      | 0.11 (0.03)   | 1.12 (1.12, 1.19)   | 3.6        | 0.0003  |
| Angina                               | -0.34 (0.07)  | 0.71 (0.71, 0.81)   | -4.9       | <.0001  |
| Valvular Disease                     | 0.25 (0.03)   | 1.28 (1.28, 1.36)   | 7.9        | <.0001  |
| Unstable Angina                      | 0.16 (0.08)   | 1.17 (1.17, 1.36)   | 2.1        | 0.0396  |
| Hypertension                         | -0.15 (0.05)  | 0.86 (0.86, 0.95)   | -3.2       | 0.0016  |
| Diabetes                             | -0.26 (0.03)  | 0.77 (0.77, 0.82)   | -8.5       | <.0001  |
| Renal Dysfunction                    | 1.48 (0.03)   | 4.41 (4.41, 4.70)   | 46.8       | <.0001  |
| Renal Failure                        | 0.18 (0.04)   | 1.20 (1.20, 1.30)   | 4.4        | <.0001  |
| Liver Disease                        | 0.21 (0.03)   | 1.24 (1.24, 1.32)   | 6.1        | <.0001  |
| Cancer                               | 0.08 (0.03)   | 1.09 (1.09, 1.15)   | 2.9        | 0.0041  |
| Specific Abdominal Cancer            | 0.38 (0.05)   | 1.47 (1.47, 1.63)   | 7.1        | <.0001  |
| Dementia                             | 0.69 (0.04)   | 1.99 (1.99, 2.14)   | 19.5       | <.0001  |
| Stroke                               | 0.00 (0.04)   | 1.00 (1.00, 1.08)   | 0.0        | 0.9922  |
| Seizure                              | 0.30 (0.08)   | 1.35 (1.35, 1.59)   | 3.8        | 0.0002  |
| Paraplegia                           | 0.31 (0.08)   | 1.36 (1.36, 1.58)   | 4.1        | <.0001  |
| COPD                                 | 0.48 (0.03)   | 1.61 (1.61, 1.71)   | 15.8       | <.0001  |
| Asthma                               | -0.15 (0.05)  | 0.86 (0.86, 0.94)   | -3.2       | 0.0012  |
| Post-inflammatory Pulmonary Fibrosis | 0.39 (0.06)   | 1.48 (1.48, 1.66)   | 6.6        | <.0001  |
| Hypothyroidism                       | -0.03 (0.03)  | 0.97 (0.97, 1.03)   | -1.0       | 0.3076  |
| Thrombocytopenia                     | 0.17 (0.06)   | 1.19 (1.19, 1.33)   | 3.0        | 0.0027  |
| Collagen Vascular Disease            | 0.07 (0.05)   | 1.07 (1.07, 1.19)   | 1.3        | 0.2012  |
| Chronic Peptic Ulcer                 | 0.57 (0.19)   | 1.76 (1.76, 2.57)   | 2.9        | 0.0034  |
| Coagulopathy                         | -0.04 (0.18)  | 0.96 (0.96, 1.35)   | -0.2       | 0.8170  |
| Other Coagulopathy                   | 0.77 (0.04)   | 2.17 (2.17, 2.36)   | 17.6       | <.0001  |
| Cushing's Disease                    | 0.24 (0.33)   | 1.27 (1.27, 2.40)   | 0.7        | 0.4657  |
| Graves' Disease                      | -0.68 (0.27)  | 0.51 (0.51, 0.86)   | -2.5       | 0.0119  |
| Hemoglobin Disorder                  | -0.59 (0.75)  | 0.56 (0.56, 2.40)   | -0.8       | 0.4323  |
| Summary Statistics                   |               |                     |            |         |
| Number of Observations               | 113,644       |                     |            |         |
| Number of Deaths                     | 5,779         |                     |            |         |
| C-statistic                          | 0.791         |                     |            |         |

**eTable 4g. Orthopedics (10/1/2010-2013) Risk Model.**

| Covariate                             | Estimate (SE) | Odds Ratio (95% CI) | Chi-Square | P-value |
|---------------------------------------|---------------|---------------------|------------|---------|
| Intercept                             | -6.36 (0.17)  | 0.00 (0.00, 0.00)   | -38.2      | <.0001  |
| Age 65-69 (Reference)                 | --            | --                  | --         | --      |
| Age 70-74                             | 0.35 (0.10)   | 1.41 (1.41, 1.72)   | 3.5        | 0.0005  |
| Age 75-79                             | 0.74 (0.09)   | 2.10 (2.10, 2.52)   | 8.0        | <.0001  |
| Age 80-84                             | 1.04 (0.09)   | 2.83 (2.83, 3.37)   | 11.6       | <.0001  |
| Age 85+                               | 1.68 (0.09)   | 5.38 (5.38, 6.38)   | 19.3       | <.0001  |
| Sex (Female)                          | -0.44 (0.03)  | 0.64 (0.64, 0.69)   | -13.0      | <.0001  |
| Emergent Admission                    | 0.66 (0.04)   | 1.94 (1.94, 2.10)   | 16.9       | <.0001  |
| Transfer-in                           | 0.72 (0.10)   | 2.06 (2.06, 2.48)   | 7.6        | <.0001  |
| Past Admission in Last 6 Months       | -0.06 (0.04)  | 0.94 (0.94, 1.01)   | -1.6       | 0.1108  |
| Principal Procedure Categories        |               |                     |            |         |
| Hip Repair                            | 1.13 (0.15)   | 3.09 (3.09, 4.11)   | 7.7        | <.0001  |
| Hip Replacement                       | 0.96 (0.14)   | 2.60 (2.60, 3.45)   | 6.6        | <.0001  |
| Hip Replacement Revision              | 0.40 (0.17)   | 1.49 (1.49, 2.08)   | 2.4        | 0.0180  |
| Knee Replacement                      | -0.31 (0.15)  | 0.73 (0.73, 0.98)   | -2.1       | 0.0390  |
| Knee Replacement Revision (Reference) | --            | --                  | --         | --      |
| Same-Day Secondary Procedures         |               |                     |            |         |
| Major Operative Therapeutic Procedure | 0.42 (0.06)   | 1.53 (1.53, 1.72)   | 7.1        | <.0001  |
| Comorbidities                         |               |                     |            |         |
| Congestive Heart Failure              | 0.55 (0.04)   | 1.73 (1.73, 1.86)   | 14.8       | <.0001  |
| Past Myocardial Infarction            | 0.08 (0.05)   | 1.08 (1.08, 1.19)   | 1.7        | 0.0903  |
| Past Arrhythmia                       | 0.06 (0.04)   | 1.06 (1.06, 1.14)   | 1.7        | 0.0967  |
| Angina                                | -0.14 (0.09)  | 0.87 (0.87, 1.03)   | -1.6       | 0.1106  |
| Valvular Disease                      | 0.19 (0.04)   | 1.21 (1.21, 1.29)   | 5.3        | <.0001  |
| Unstable Angina                       | -0.03 (0.12)  | 0.97 (0.97, 1.23)   | -0.3       | 0.7876  |
| Hypertension                          | -0.23 (0.05)  | 0.80 (0.80, 0.88)   | -4.6       | <.0001  |
| Diabetes                              | -0.06 (0.04)  | 0.94 (0.94, 1.01)   | -1.8       | 0.0756  |
| Renal Dysfunction                     | 0.71 (0.04)   | 2.04 (2.04, 2.19)   | 19.9       | <.0001  |
| Renal Failure                         | 0.27 (0.06)   | 1.31 (1.31, 1.47)   | 4.5        | <.0001  |
| Liver Disease                         | 0.65 (0.07)   | 1.92 (1.92, 2.19)   | 9.8        | <.0001  |
| Cancer                                | 0.07 (0.03)   | 1.08 (1.08, 1.15)   | 2.1        | 0.0331  |
| Specific Abdominal Cancer             | 0.60 (0.20)   | 1.81 (1.81, 2.68)   | 3.0        | 0.0026  |
| Dementia                              | 0.94 (0.03)   | 2.57 (2.57, 2.75)   | 27.1       | <.0001  |
| Stroke                                | 0.12 (0.04)   | 1.12 (1.12, 1.21)   | 2.9        | 0.0041  |
| Seizure                               | 0.16 (0.09)   | 1.18 (1.18, 1.40)   | 1.8        | 0.0670  |
| Paraplegia                            | 0.18 (0.09)   | 1.19 (1.19, 1.42)   | 2.0        | 0.0406  |
| COPD                                  | 0.47 (0.03)   | 1.60 (1.60, 1.72)   | 13.6       | <.0001  |
| Asthma                                | -0.11 (0.06)  | 0.90 (0.90, 1.01)   | -1.9       | 0.0641  |
| Post-inflammatory Pulmonary Fibrosis  | 0.26 (0.07)   | 1.30 (1.30, 1.48)   | 3.8        | 0.0001  |
| Hypothyroidism                        | -0.09 (0.04)  | 0.91 (0.91, 0.98)   | -2.5       | 0.0115  |
| Thrombocytopenia                      | -0.03 (0.09)  | 0.97 (0.97, 1.14)   | -0.4       | 0.7058  |
| Collagen Vascular Disease             | -0.18 (0.07)  | 0.83 (0.83, 0.95)   | -2.8       | 0.0056  |
| Coagulopathy                          | 0.11 (0.20)   | 1.12 (1.12, 1.67)   | 0.5        | 0.5919  |
| Other Coagulopathy                    | 0.27 (0.07)   | 1.31 (1.31, 1.49)   | 4.0        | 0.0001  |
| Cushing's Disease                     | 0.45 (0.73)   | 1.57 (1.57, 6.60)   | 0.6        | 0.5398  |
| Graves' Disease                       | -0.49 (0.43)  | 0.62 (0.62, 1.42)   | -1.1       | 0.2533  |
| Summary Statistics                    |               |                     |            |         |
| Number of Observations                | 263,714       |                     |            |         |
| Number of Deaths                      | 4,571         |                     |            |         |
| C-statistic                           | 0.898         |                     |            |         |



**eTable 4h. Orthopedics (10/1/2010-2013) Risk Model (Comorbidities Only).**

| Covariate                            | Estimate (SE) | Odds Ratio (95% CI) | Chi-Square | P-value |
|--------------------------------------|---------------|---------------------|------------|---------|
| Intercept                            | -5.10 (0.05)  | 0.01 (0.01, 0.01)   | -103.3     | <.0001  |
| Congestive Heart Failure             | 0.82 (0.04)   | 2.27 (2.27, 2.44)   | 22.0       | <.0001  |
| Past Myocardial Infarction           | 0.11 (0.05)   | 1.12 (1.12, 1.23)   | 2.4        | 0.0166  |
| Past Arrhythmia                      | 0.11 (0.03)   | 1.12 (1.12, 1.20)   | 3.2        | 0.0012  |
| Angina                               | -0.22 (0.09)  | 0.80 (0.80, 0.95)   | -2.5       | 0.0113  |
| Valvular Disease                     | 0.34 (0.03)   | 1.40 (1.40, 1.50)   | 9.6        | <.0001  |
| Unstable Angina                      | -0.06 (0.12)  | 0.95 (0.95, 1.20)   | -0.5       | 0.6439  |
| Hypertension                         | -0.22 (0.05)  | 0.81 (0.81, 0.89)   | -4.4       | <.0001  |
| Diabetes                             | -0.23 (0.04)  | 0.79 (0.79, 0.85)   | -6.6       | <.0001  |
| Renal Dysfunction                    | 0.97 (0.04)   | 2.64 (2.64, 2.83)   | 27.2       | <.0001  |
| Renal Failure                        | 0.25 (0.06)   | 1.28 (1.28, 1.44)   | 4.2        | <.0001  |
| Liver Disease                        | 0.51 (0.07)   | 1.67 (1.67, 1.90)   | 7.9        | <.0001  |
| Cancer                               | 0.18 (0.03)   | 1.20 (1.20, 1.28)   | 5.5        | <.0001  |
| Specific Abdominal Cancer            | 0.75 (0.20)   | 2.11 (2.11, 3.12)   | 3.8        | 0.0002  |
| Dementia                             | 1.84 (0.03)   | 6.30 (6.30, 6.72)   | 56.2       | <.0001  |
| Stroke                               | 0.19 (0.04)   | 1.21 (1.21, 1.31)   | 4.8        | <.0001  |
| Seizure                              | 0.06 (0.09)   | 1.06 (1.06, 1.27)   | 0.7        | 0.4844  |
| Paraplegia                           | 0.18 (0.09)   | 1.20 (1.20, 1.42)   | 2.1        | 0.0377  |
| COPD                                 | 0.56 (0.03)   | 1.76 (1.76, 1.88)   | 16.4       | <.0001  |
| Asthma                               | -0.36 (0.06)  | 0.70 (0.70, 0.78)   | -6.3       | <.0001  |
| Post-inflammatory Pulmonary Fibrosis | 0.38 (0.07)   | 1.46 (1.46, 1.66)   | 5.6        | <.0001  |
| Hypothyroidism                       | -0.09 (0.03)  | 0.91 (0.91, 0.98)   | -2.6       | 0.0107  |
| Thrombocytopenia                     | -0.03 (0.08)  | 0.97 (0.97, 1.15)   | -0.3       | 0.7543  |
| Collagen Vascular Disease            | -0.42 (0.07)  | 0.66 (0.66, 0.75)   | -6.3       | <.0001  |
| Coagulopathy                         | 0.08 (0.20)   | 1.08 (1.08, 1.62)   | 0.4        | 0.6887  |
| Other Coagulopathy                   | 0.24 (0.07)   | 1.27 (1.27, 1.45)   | 3.7        | 0.0002  |
| Cushing's Disease                    | 0.11 (0.73)   | 1.12 (1.12, 4.66)   | 0.2        | 0.8754  |
| Graves' Disease                      | -0.68 (0.42)  | 0.51 (0.51, 1.15)   | -1.6       | 0.1053  |
| Summary Statistics                   |               |                     |            |         |
| Number of Observations               | 263,714       |                     |            |         |
| Number of Deaths                     | 4,571         |                     |            |         |
| C-statistic                          | 0.856         |                     |            |         |

**eTable 5. Prolonged Length of Stay.** A prolonged stay is defined as exceeding the length of stay at which the rate of discharge begins to decline (the Hollander-Proschan point)<sup>6-9</sup> or in-hospital death. In-hospital deaths are included to avoid giving inappropriate credit for the early death of a patient. The cutpoints for defining a prolonged stay were estimated separately for each procedure category and era using a dataset of 996,086 patients not used for matching.

| <b>Procedure Category</b>   | <b>HP Cutpoint<br/>(Days)</b> |
|-----------------------------|-------------------------------|
| Adrenalectomy               | 3                             |
| Appendectomy                | 3                             |
| Bariatric                   | 3                             |
| Biliary Common Duct         | 8                             |
| Biliary Other               | 7                             |
| Cholecystectomy             | 4                             |
| Colectomy Partial - Lap     | 5                             |
| Colectomy Partial - Open    | 6                             |
| Colectomy Total - Lap       | 4                             |
| Colectomy Total - Open      | 14                            |
| Esophagectomy               | 9                             |
| Esophagomyotomy             | 2                             |
| Hernia Abdominal – Lap      | 3                             |
| Hernia Abdominal – Open     | 4                             |
| Hernia Groin – Lap          | 3                             |
| Hernia Groin – Open         | 3                             |
| Hip Repair                  | 6                             |
| Hip Replacement             | 5                             |
| Hip Replacement Revision    | 5                             |
| Knee Replacement            | 5                             |
| Knee Replacement Revision   | 5                             |
| Large Bowel Other           | 6                             |
| Liver Other                 | 7                             |
| Liver Partial Hepatectomy   | 6                             |
| Lysis Of Adhesions          | 8                             |
| Mastectomy                  | 3                             |
| Pancreatectomy              | 7                             |
| Parathyroidectomy           | 3                             |
| Pd Access Procedure         | 8                             |
| Proctectomy                 | 6                             |
| Proctopexy                  | 5                             |
| Pyloroplasty                | 11                            |
| Small Bowel Other           | 8                             |
| Small Bowel Resection       | 7                             |
| Splenectomy                 | 4                             |
| Stomach Anti-Reflux         | 3                             |
| Stomach Gastric Bypass      | 13                            |
| Stomach Other               | 6                             |
| Stomach Partial Gastrectomy | 7                             |
| Stomach Total Gastrectomy   | 9                             |
| Thyroidectomy Partial       | 4                             |
| Thyroidectomy Substernal    | 3                             |
| Thyroidectomy Total         | 3                             |
| Ulcer                       | 8                             |

eTable 6. Complete Step Table

| Variable<br>(percent unless noted)     | All New<br>Surgeon<br>Patients | Sampled &<br>Matched New<br>Surgeon Patients | Exp. Surgeon Patients Matched for:                |                                 |                     |               | All Exp. After<br>Surgeon<br>Pairing | All Exp.<br>Before<br>Surgeon<br>Pairing |
|----------------------------------------|--------------------------------|----------------------------------------------|---------------------------------------------------|---------------------------------|---------------------|---------------|--------------------------------------|------------------------------------------|
|                                        |                                |                                              | Year +<br>Operation +<br>Emerg. +<br>Risk Factors | Year +<br>Operation +<br>Emerg. | Year +<br>Operation | Year          |                                      |                                          |
| Number of Surgeons                     | 2,119                          | 1,820                                        | 1,820                                             | 1,820                           | 1,820               | 1,820         | 1,820                                | 8,503                                    |
| Number of Patients                     | 68,036                         | 18,200                                       | 18,200                                            | 18,200                          | 18,200              | 18,200        | 203,113                              | 694,165                                  |
| <b>Year of admission (mean)</b>        | 2011.4                         | <b>2011.5</b>                                | <b>2011.4</b>                                     | <b>2011.5</b>                   | <b>2011.5</b>       | <b>2011.5</b> | 2011.0                               | 2011.0                                   |
| <b>Principal Procedure Categories</b>  |                                |                                              |                                                   |                                 |                     |               |                                      |                                          |
| <i>General Surgery</i>                 |                                |                                              |                                                   |                                 |                     |               |                                      |                                          |
| Adrenalectomy                          | 0.2                            | <b>0.3</b>                                   | <b>0.3</b>                                        | <b>0.3</b>                      | <b>0.3</b>          | 0.3           | 0.3                                  | 0.3                                      |
| Appendectomy                           | 5.1                            | <b>5.3</b>                                   | <b>5.3</b>                                        | <b>5.3</b>                      | <b>5.3</b>          | 3.9           | 3.9                                  | 3.7                                      |
| Bariatric                              | 0.3                            | <b>0.5</b>                                   | <b>0.5</b>                                        | <b>0.5</b>                      | <b>0.5</b>          | 0.8           | 0.6                                  | 1.2                                      |
| Biliary common duct                    | 0.1                            | --*                                          | --*                                               | --*                             | --*                 | --*           | 0.1                                  | 0.1                                      |
| Biliary other                          | 0.2                            | --*                                          | --*                                               | --*                             | --*                 | 0.3           | 0.4                                  | 0.4                                      |
| Cholecystectomy                        | 31.0                           | <b>29.8</b>                                  | <b>29.8</b>                                       | <b>29.8</b>                     | <b>29.8</b>         | 24.5          | 25.4                                 | 23.1                                     |
| Colectomy Partial – Lap                | 9.3                            | <b>9.1</b>                                   | <b>9.1</b>                                        | <b>9.1</b>                      | <b>9.1</b>          | 9.0           | 10.0                                 | 9.0                                      |
| Colectomy Partial – Open               | 17.8                           | <b>18.0</b>                                  | <b>18.0</b>                                       | <b>18.0</b>                     | <b>18.0</b>         | 18.2          | 17.7                                 | 17.2                                     |
| Colectomy Total – Lap                  | 0.2                            | <b>0.3</b>                                   | <b>0.3</b>                                        | <b>0.3</b>                      | <b>0.3</b>          | 0.2           | 0.2                                  | 0.1                                      |
| Colectomy Total – Open                 | 1.3                            | <b>1.2</b>                                   | <b>1.2</b>                                        | <b>1.2</b>                      | <b>1.2</b>          | 1.2           | 1.0                                  | 1.0                                      |
| Esophagectomy                          | 0.1                            | --*                                          | --*                                               | --*                             | --*                 | 0.1           | 0.2                                  | 0.4                                      |
| Esophagomyotomy                        | 0.1                            | --*                                          | --*                                               | --*                             | --*                 | 0.2           | 0.2                                  | 0.2                                      |
| Hernia Abdominal – Lap                 | 1.4                            | <b>1.5</b>                                   | <b>1.5</b>                                        | <b>1.5</b>                      | <b>1.5</b>          | 1.3           | 1.3                                  | 1.2                                      |
| Hernia Abdominal – Open                | 3.2                            | <b>3.3</b>                                   | <b>3.3</b>                                        | <b>3.3</b>                      | <b>3.3</b>          | 5.6           | 5.3                                  | 5.1                                      |
| Hernia Groin – Lap                     | 0.4                            | <b>0.4</b>                                   | <b>0.4</b>                                        | <b>0.4</b>                      | <b>0.4</b>          | 0.3           | 0.5                                  | 0.3                                      |
| Hernia Groin – Open                    | 3.4                            | <b>3.6</b>                                   | <b>3.6</b>                                        | <b>3.6</b>                      | <b>3.6</b>          | 3.4           | 3.2                                  | 3.1                                      |
| Large Bowel Other                      | 0.7                            | <b>0.8</b>                                   | <b>0.8</b>                                        | <b>0.8</b>                      | <b>0.8</b>          | 0.8           | 0.8                                  | 0.8                                      |
| Liver Other                            | --*                            | --*                                          | --*                                               | --*                             | --*                 | 0.1           | 0.1                                  | 0.1                                      |
| Liver Partial Hepatectomy              | 0.2                            | <b>0.3</b>                                   | <b>0.3</b>                                        | <b>0.3</b>                      | <b>0.3</b>          | 0.5           | 0.7                                  | 1.1                                      |
| Lysis of Adhesions                     | 5.5                            | <b>5.6</b>                                   | <b>5.6</b>                                        | <b>5.6</b>                      | <b>5.6</b>          | 5.6           | 5.1                                  | 4.6                                      |
| Mastectomy                             | 1.3                            | <b>1.4</b>                                   | <b>1.4</b>                                        | <b>1.4</b>                      | <b>1.4</b>          | 3.0           | 2.6                                  | 3.9                                      |
| Pancreatectomy                         | 0.7                            | <b>0.7</b>                                   | <b>0.7</b>                                        | <b>0.7</b>                      | <b>0.7</b>          | 1.7           | 1.8                                  | 2.5                                      |
| Parathyroidectomy                      | 0.3                            | <b>0.3</b>                                   | <b>0.3</b>                                        | <b>0.3</b>                      | <b>0.3</b>          | 0.7           | 0.8                                  | 1.3                                      |
| PD Access Procedure                    | 0.3                            | <b>0.3</b>                                   | <b>0.3</b>                                        | <b>0.3</b>                      | <b>0.3</b>          | 0.3           | 0.3                                  | 0.3                                      |
| Proctectomy                            | 2.8                            | <b>2.9</b>                                   | <b>2.9</b>                                        | <b>2.9</b>                      | <b>2.9</b>          | 2.9           | 3.1                                  | 3.4                                      |
| Proctopexy                             | 0.1                            | <b>0.1</b>                                   | <b>0.1</b>                                        | <b>0.1</b>                      | <b>0.1</b>          | 0.1           | 0.1                                  | 0.2                                      |
| Pyloroplasty                           | 0.1                            | <b>0.2</b>                                   | <b>0.2</b>                                        | <b>0.2</b>                      | <b>0.2</b>          | 0.1           | 0.1                                  | 0.1                                      |
| Small Bowel Other                      | 0.7                            | <b>0.8</b>                                   | <b>0.8</b>                                        | <b>0.8</b>                      | <b>0.8</b>          | 0.8           | 0.7                                  | 0.7                                      |
| Small Bowel Resection                  | 8.3                            | <b>8.3</b>                                   | <b>8.3</b>                                        | <b>8.3</b>                      | <b>8.3</b>          | 6.9           | 6.6                                  | 6.1                                      |
| Splenectomy                            | 0.7                            | <b>0.7</b>                                   | <b>0.7</b>                                        | <b>0.7</b>                      | <b>0.7</b>          | 1.0           | 0.8                                  | 0.8                                      |
| Stomach Anti-Reflux                    | 0.4                            | <b>0.3</b>                                   | <b>0.3</b>                                        | <b>0.3</b>                      | <b>0.3</b>          | 0.7           | 1.0                                  | 0.9                                      |
| Stomach Gastric Bypass (non-bariatric) | 0.4                            | <b>0.3</b>                                   | <b>0.3</b>                                        | <b>0.3</b>                      | <b>0.3</b>          | 0.5           | 0.5                                  | 0.5                                      |
| Stomach Other                          | 0.3                            | <b>0.3</b>                                   | <b>0.3</b>                                        | <b>0.3</b>                      | <b>0.3</b>          | 0.4           | 0.3                                  | 0.3                                      |
| Stomach Partial Gastrectomy            | 0.9                            | <b>1.0</b>                                   | <b>1.0</b>                                        | <b>1.0</b>                      | <b>1.0</b>          | 1.4           | 1.5                                  | 1.5                                      |
| Stomach Total Gastrectomy              | 0.1                            | --*                                          | --*                                               | --*                             | --*                 | 0.3           | 0.4                                  | 0.4                                      |

| Variable<br>(percent unless noted)                   | All New<br>Surgeon<br>Patients | Sampled &<br>Matched New<br>Surgeon Patients | Exp. Surgeon Patients Matched for:                |                                 |                     |      | All Exp. After<br>Surgeon<br>Pairing | All Exp.<br>Before<br>Surgeon<br>Pairing |
|------------------------------------------------------|--------------------------------|----------------------------------------------|---------------------------------------------------|---------------------------------|---------------------|------|--------------------------------------|------------------------------------------|
|                                                      |                                |                                              | Year +<br>Operation +<br>Emerg. +<br>Risk Factors | Year +<br>Operation +<br>Emerg. | Year +<br>Operation | Year |                                      |                                          |
| Thyroidectomy Partial                                | 0.2                            | 0.3                                          | 0.3                                               | 0.3                             | 0.3                 | 0.6  | 0.6                                  | 1.1                                      |
| Thyroidectomy Substernal                             | --*                            | --*                                          | --*                                               | --*                             | --*                 | 0.1  | 0.1                                  | 0.2                                      |
| Thyroidectomy Total                                  | 0.4                            | 0.5                                          | 0.5                                               | 0.5                             | 0.5                 | 0.9  | 0.8                                  | 1.7                                      |
| Ulcer                                                | 1.4                            | 1.4                                          | 1.4                                               | 1.4                             | 1.4                 | 1.2  | 1.0                                  | 0.9                                      |
| <i>Orthopedic Surgery</i>                            |                                |                                              |                                                   |                                 |                     |      |                                      |                                          |
| Hip Repair                                           | 23.2                           | 29.7                                         | 29.7                                              | 29.7                            | 29.7                | 17.1 | 10.4                                 | 9.0                                      |
| Hip Replacement                                      | 46.8                           | 50.1                                         | 50.1                                              | 50.1                            | 50.1                | 37.4 | 35.5                                 | 33.4                                     |
| Hip Replacement Revision                             | 3.7                            | 2.0                                          | 2.0                                               | 2.0                             | 2.0                 | 3.0  | 3.5                                  | 3.2                                      |
| Knee Replacement                                     | 23.2                           | 16.8                                         | 16.8                                              | 16.8                            | 16.8                | 39.8 | 47.3                                 | 51.0                                     |
| Knee Replacement Revision                            | 3.1                            | 1.5                                          | 1.5                                               | 1.5                             | 1.5                 | 2.8  | 3.4                                  | 3.5                                      |
| <b>Emergent Admission</b>                            | 47.2                           | 53.9                                         | 53.9                                              | 53.9                            | 43.0                | 34.7 | 25.8                                 | 23.0                                     |
| <b>Risk Factors &amp; Patient Demographics</b>       |                                |                                              |                                                   |                                 |                     |      |                                      |                                          |
| Age at Admission (years, mean)                       | 78.7                           | 79.0                                         | 79.1                                              | 78.7                            | 78.2                | 77.2 | 77.0                                 | 76.7                                     |
| Age 65-69                                            | 18.1                           | 17.2                                         | 16.9                                              | 18.1                            | 19.0                | 21.6 | 21.6                                 | 22.7                                     |
| Age 70-74                                            | 19.7                           | 19.7                                         | 19.1                                              | 19.9                            | 21.2                | 23.4 | 23.9                                 | 24.5                                     |
| Age 75-79                                            | 19.0                           | 18.7                                         | 18.8                                              | 19.1                            | 19.5                | 20.3 | 21.2                                 | 21.2                                     |
| Age 80-84                                            | 18.6                           | 18.7                                         | 18.5                                              | 18.8                            | 18.5                | 17.0 | 17.0                                 | 16.5                                     |
| Age 85+                                              | 24.6                           | 25.8                                         | 26.7                                              | 24.1                            | 21.9                | 17.8 | 16.3                                 | 15.0                                     |
| Sex (% female)                                       | 63.5                           | 63.0                                         | 63.1                                              | 62.5                            | 61.9                | 61.8 | 62.8                                 | 63.0                                     |
| Transfer-in                                          | 2.5                            | 2.5                                          | 2.5                                               | 1.9                             | 2.2                 | 2.0  | 1.5                                  | 1.2                                      |
| Past Admission in Last 6 Months                      | 24.0                           | 25.6                                         | 24.1                                              | 24.5                            | 24.1                | 22.9 | 19.3                                 | 18.0                                     |
| Admission after 9/30/2010                            | 84.6                           | 87.4                                         | 87.4                                              | 87.4                            | 87.4                | 87.4 | 68.5                                 | 68.4                                     |
| Admission in 2012 or 2013                            | 48.3                           | 54.9                                         | 49.7                                              | 54.8                            | 54.9                | 54.9 | 36.6                                 | 37.3                                     |
| Probability of 30-day Death                          | 4.8                            | 5.6                                          | 5.5                                               | 5.2                             | 4.7                 | 4.2  | 3.0                                  | 2.7                                      |
| Comorbidity Count (mean)                             | 4.0                            | 4.1                                          | 4.0                                               | 4.0                             | 4.0                 | 3.9  | 3.5                                  | 3.5                                      |
| <i>Same-Day Secondary Procedures</i>                 |                                |                                              |                                                   |                                 |                     |      |                                      |                                          |
| Major Operative Therapeutic<br><i>Comorbidities*</i> | 22.1                           | 26.7                                         | 25.7                                              | 25.6                            | 25.8                | 26.5 | 19.7                                 | 18.3                                     |
| Congestive Heart Failure                             | 20.5                           | 22.2                                         | 21.4                                              | 20.5                            | 19.9                | 18.2 | 15.2                                 | 14.0                                     |
| Past Myocardial Infarction                           | 9.9                            | 10.4                                         | 9.1                                               | 9.9                             | 10.0                | 9.5  | 8.3                                  | 8.0                                      |
| Past Arrhythmia                                      | 29.2                           | 30.5                                         | 29.8                                              | 30.3                            | 30.0                | 29.2 | 26.9                                 | 26.7                                     |
| Angina                                               | 3.6                            | 4.0                                          | 2.9                                               | 3.5                             | 3.6                 | 3.7  | 3.5                                  | 3.4                                      |
| Valvular Disease                                     | 22.9                           | 23.9                                         | 22.9                                              | 22.8                            | 22.4                | 21.0 | 19.6                                 | 19.4                                     |
| Unstable Angina                                      | 1.8                            | 1.8                                          | 1.4                                               | 2.0                             | 2.1                 | 1.9  | 1.5                                  | 1.4                                      |
| Hypertension                                         | 85.8                           | 86.0                                         | 86.0                                              | 85.1                            | 85.1                | 85.2 | 84.7                                 | 84.5                                     |
| Diabetes                                             | 31.8                           | 32.5                                         | 32.9                                              | 31.9                            | 32.0                | 32.2 | 30.1                                 | 29.8                                     |
| Renal Dysfunction                                    | 22.7                           | 25.2                                         | 24.8                                              | 22.6                            | 21.5                | 20.8 | 16.4                                 | 15.5                                     |
| Renal Failure                                        | 5.0                            | 5.6                                          | 5.0                                               | 5.2                             | 5.1                 | 4.8  | 3.7                                  | 3.5                                      |
| Liver Disease                                        | 8.8                            | 10.7                                         | 10.2                                              | 10.8                            | 10.7                | 10.4 | 7.8                                  | 7.5                                      |
| Cancer                                               | 33.6                           | 36.0                                         | 37.9                                              | 37.4                            | 37.6                | 38.7 | 34.4                                 | 34.4                                     |
| Specific Abdominal Cancer                            | 1.5                            | 1.9                                          | 2.3                                               | 2.0                             | 2.0                 | 2.6  | 2.0                                  | 2.2                                      |

| Variable<br>(percent unless noted)   | All New<br>Surgeon<br>Patients | Sampled &<br>Matched New<br>Surgeon Patients | Exp. Surgeon Patients Matched for:                |                                 |                     |      | All Exp. After<br>Surgeon<br>Pairing | All Exp.<br>Before<br>Surgeon<br>Pairing |
|--------------------------------------|--------------------------------|----------------------------------------------|---------------------------------------------------|---------------------------------|---------------------|------|--------------------------------------|------------------------------------------|
|                                      |                                |                                              | Year +<br>Operation +<br>Emerg. +<br>Risk Factors | Year +<br>Operation +<br>Emerg. | Year +<br>Operation | Year |                                      |                                          |
| Dementia                             | 19.9                           | 21.2                                         | 20.5                                              | 18.4                            | 16.7                | 13.8 | 11.7                                 | 10.7                                     |
| Stroke                               | 14.7                           | 15.9                                         | 14.4                                              | 15.1                            | 14.1                | 13.0 | 11.0                                 | 10.5                                     |
| Seizure                              | 2.2                            | 2.3                                          | 1.6                                               | 2.1                             | 2.0                 | 2.0  | 1.6                                  | 1.5                                      |
| Paraplegia                           | 2.6                            | 2.9                                          | 2.0                                               | 2.7                             | 2.5                 | 2.2  | 1.7                                  | 1.5                                      |
| COPD                                 | 25.9                           | 27.3                                         | 26.4                                              | 26.7                            | 26.4                | 24.9 | 21.7                                 | 20.4                                     |
| Asthma                               | 9.3                            | 9.1                                          | 9.3                                               | 9.7                             | 9.9                 | 10.1 | 9.8                                  | 10.0                                     |
| Post-inflammatory Pulmonary Fibrosis | 3.6                            | 3.9                                          | 3.9                                               | 3.8                             | 3.6                 | 3.5  | 2.8                                  | 2.7                                      |
| Hypothyroidism                       | 25.3                           | 25.2                                         | 24.6                                              | 25.4                            | 25.2                | 24.5 | 25.0                                 | 25.0                                     |
| Thrombocytopenia                     | 2.8                            | 2.9                                          | 3.1                                               | 2.9                             | 2.9                 | 2.6  | 2.3                                  | 2.2                                      |
| Collagen Vascular Disease            | 7.3                            | 6.8                                          | 6.1                                               | 7.3                             | 7.3                 | 7.4  | 7.7                                  | 7.9                                      |
| AIDS                                 | 0.1                            | 0.1                                          | 0.1                                               | 0.1                             | 0.1                 | 0.1  | 0.1                                  | 0.1                                      |
| Chronic Peptic Ulcer                 | 0.2                            | 0.2                                          | 0.2                                               | 0.2                             | 0.2                 | 0.2  | 0.2                                  | 0.2                                      |
| Coagulopathy                         | 0.5                            | 0.4                                          | 0.5                                               | 0.5                             | 0.5                 | 0.4  | 0.5                                  | 0.5                                      |
| Other Coagulopathy                   | 4.1                            | 4.5                                          | 4.5                                               | 4.4                             | 4.2                 | 4.1  | 3.9                                  | 4.1                                      |
| Cushing's Disease                    | 0.1                            | 0.1                                          | 0.1                                               | 0.1                             | 0.1                 | 0.1  | 0.1                                  | 0.1                                      |
| Graves' Disease                      | 0.3                            | 0.4                                          | 0.3                                               | 0.3                             | 0.3                 | 0.4  | 0.3                                  | 0.4                                      |
| Hemoglobin Disorder                  | 0.0                            | --*                                          | --*                                               | --*                             | --*                 | --*  | 0.0                                  | 0.0                                      |

**eTable 6a. Step Table for General Surgery**

| Variable<br>(percent unless noted)     | All New<br>Surgeon<br>Patients | Sampled &<br>Matched<br>New<br>Surgeon<br>Patients | Exp. Surgeon Patients Matched for:                |                                |                     |               | All Exp.<br>After<br>Surgeon<br>Pairing | All Exp.<br>Before<br>Surgeon<br>Pairing |
|----------------------------------------|--------------------------------|----------------------------------------------------|---------------------------------------------------|--------------------------------|---------------------|---------------|-----------------------------------------|------------------------------------------|
|                                        |                                |                                                    | Year +<br>Operation +<br>Emerg. +<br>Risk Factors | Year +<br>Operation+<br>Emerg. | Year +<br>Operation | Year          |                                         |                                          |
| Number of Surgeons                     | 1,027                          | 994                                                | 994                                               | 994                            | 994                 | 994           | 994                                     | 4,324                                    |
| Number of Patients                     | 28,536                         | 9,940                                              | 9,940                                             | 9,940                          | 9,940               | 9,940         | 72,068                                  | 220,137                                  |
| <b>Year of admission (mean)</b>        | 2011.3                         | <b>2011.5</b>                                      | <b>2011.3</b>                                     | <b>2011.5</b>                  | <b>2011.5</b>       | <b>2011.5</b> | 2010.9                                  | 2010.9                                   |
| <b>Principal Procedure Categories</b>  |                                |                                                    |                                                   |                                |                     |               |                                         |                                          |
| Adrenalectomy                          | 0.2                            | <b>0.3</b>                                         | <b>0.3</b>                                        | <b>0.3</b>                     | <b>0.3</b>          | 0.3           | 0.3                                     | 0.3                                      |
| Appendectomy                           | 5.1                            | <b>5.3</b>                                         | <b>5.3</b>                                        | <b>5.3</b>                     | <b>5.3</b>          | 3.9           | 3.9                                     | 3.7                                      |
| Bariatric                              | 0.3                            | <b>0.5</b>                                         | <b>0.5</b>                                        | <b>0.5</b>                     | <b>0.5</b>          | 0.8           | 0.6                                     | 1.2                                      |
| Biliary common duct                    | 0.1                            | --*                                                | --*                                               | --*                            | --*                 | --*           | 0.1                                     | 0.1                                      |
| Biliary other                          | 0.2                            | --*                                                | --*                                               | --*                            | --*                 | 0.3           | 0.4                                     | 0.4                                      |
| Cholecystectomy                        | 31.0                           | <b>29.8</b>                                        | <b>29.8</b>                                       | <b>29.8</b>                    | <b>29.8</b>         | 24.5          | 25.4                                    | 23.1                                     |
| Colectomy Partial – Lap                | 9.3                            | <b>9.1</b>                                         | <b>9.1</b>                                        | <b>9.1</b>                     | <b>9.1</b>          | 9.0           | 10.0                                    | 9.0                                      |
| Colectomy Partial – Open               | 17.8                           | <b>18.0</b>                                        | <b>18.0</b>                                       | <b>18.0</b>                    | <b>18.0</b>         | 18.2          | 17.7                                    | 17.2                                     |
| Colectomy Total – Lap                  | 0.2                            | <b>0.3</b>                                         | <b>0.3</b>                                        | <b>0.3</b>                     | <b>0.3</b>          | 0.2           | 0.2                                     | 0.1                                      |
| Colectomy Total – Open                 | 1.3                            | <b>1.2</b>                                         | <b>1.2</b>                                        | <b>1.2</b>                     | <b>1.2</b>          | 1.2           | 1.0                                     | 1.0                                      |
| Esophagectomy                          | 0.1                            | --*                                                | --*                                               | --*                            | --*                 | 0.1           | 0.2                                     | 0.4                                      |
| Esophagomyotomy                        | 0.1                            | --*                                                | --*                                               | --*                            | --*                 | 0.2           | 0.2                                     | 0.2                                      |
| Hernia Abdominal – Lap                 | 1.4                            | <b>1.5</b>                                         | <b>1.5</b>                                        | <b>1.5</b>                     | <b>1.5</b>          | 1.3           | 1.3                                     | 1.2                                      |
| Hernia Abdominal – Open                | 3.2                            | <b>3.3</b>                                         | <b>3.3</b>                                        | <b>3.3</b>                     | <b>3.3</b>          | 5.6           | 5.3                                     | 5.1                                      |
| Hernia Groin – Lap                     | 0.4                            | <b>0.4</b>                                         | <b>0.4</b>                                        | <b>0.4</b>                     | <b>0.4</b>          | 0.3           | 0.5                                     | 0.3                                      |
| Hernia Groin – Open                    | 3.4                            | <b>3.6</b>                                         | <b>3.6</b>                                        | <b>3.6</b>                     | <b>3.6</b>          | 3.4           | 3.2                                     | 3.1                                      |
| Large Bowel Other                      | 0.7                            | <b>0.8</b>                                         | <b>0.8</b>                                        | <b>0.8</b>                     | <b>0.8</b>          | 0.8           | 0.8                                     | 0.8                                      |
| Liver Other                            | --*                            | --*                                                | --*                                               | --*                            | --*                 | 0.1           | 0.1                                     | 0.1                                      |
| Liver Partial Hepatectomy              | 0.2                            | <b>0.3</b>                                         | <b>0.3</b>                                        | <b>0.3</b>                     | <b>0.3</b>          | 0.5           | 0.7                                     | 1.1                                      |
| Lysis of Adhesions                     | 5.5                            | <b>5.6</b>                                         | <b>5.6</b>                                        | <b>5.6</b>                     | <b>5.6</b>          | 5.6           | 5.1                                     | 4.6                                      |
| Mastectomy                             | 1.3                            | <b>1.4</b>                                         | <b>1.4</b>                                        | <b>1.4</b>                     | <b>1.4</b>          | 3.0           | 2.6                                     | 3.9                                      |
| Pancreatectomy                         | 0.7                            | <b>0.7</b>                                         | <b>0.7</b>                                        | <b>0.7</b>                     | <b>0.7</b>          | 1.7           | 1.8                                     | 2.5                                      |
| Parathyroidectomy                      | 0.3                            | <b>0.3</b>                                         | <b>0.3</b>                                        | <b>0.3</b>                     | <b>0.3</b>          | 0.7           | 0.8                                     | 1.3                                      |
| PD Access Procedure                    | 0.3                            | <b>0.3</b>                                         | <b>0.3</b>                                        | <b>0.3</b>                     | <b>0.3</b>          | 0.3           | 0.3                                     | 0.3                                      |
| Proctectomy                            | 2.8                            | <b>2.9</b>                                         | <b>2.9</b>                                        | <b>2.9</b>                     | <b>2.9</b>          | 2.9           | 3.1                                     | 3.4                                      |
| Proctopexy                             | 0.1                            | <b>0.1</b>                                         | <b>0.1</b>                                        | <b>0.1</b>                     | <b>0.1</b>          | 0.1           | 0.1                                     | 0.2                                      |
| Pyloroplasty                           | 0.1                            | <b>0.2</b>                                         | <b>0.2</b>                                        | <b>0.2</b>                     | <b>0.2</b>          | 0.1           | 0.1                                     | 0.1                                      |
| Small Bowel Other                      | 0.7                            | <b>0.8</b>                                         | <b>0.8</b>                                        | <b>0.8</b>                     | <b>0.8</b>          | 0.8           | 0.7                                     | 0.7                                      |
| Small Bowel Resection                  | 8.3                            | <b>8.3</b>                                         | <b>8.3</b>                                        | <b>8.3</b>                     | <b>8.3</b>          | 6.9           | 6.6                                     | 6.1                                      |
| Splenectomy                            | 0.7                            | <b>0.7</b>                                         | <b>0.7</b>                                        | <b>0.7</b>                     | <b>0.7</b>          | 1.0           | 0.8                                     | 0.8                                      |
| Stomach Anti-Reflux                    | 0.4                            | <b>0.3</b>                                         | <b>0.3</b>                                        | <b>0.3</b>                     | <b>0.3</b>          | 0.7           | 1.0                                     | 0.9                                      |
| Stomach Gastric Bypass (non-bariatric) | 0.4                            | <b>0.3</b>                                         | <b>0.3</b>                                        | <b>0.3</b>                     | <b>0.3</b>          | 0.5           | 0.5                                     | 0.5                                      |
| Stomach Other                          | 0.3                            | <b>0.3</b>                                         | <b>0.3</b>                                        | <b>0.3</b>                     | <b>0.3</b>          | 0.4           | 0.3                                     | 0.3                                      |
| Stomach Partial Gastrectomy            | 0.9                            | <b>1.0</b>                                         | <b>1.0</b>                                        | <b>1.0</b>                     | <b>1.0</b>          | 1.4           | 1.5                                     | 1.5                                      |
| Stomach Total Gastrectomy              | 0.1                            | --*                                                | --*                                               | --*                            | --*                 | 0.3           | 0.4                                     | 0.4                                      |
| Thyroidectomy Partial                  | 0.2                            | <b>0.3</b>                                         | <b>0.3</b>                                        | <b>0.3</b>                     | <b>0.3</b>          | 0.6           | 0.6                                     | 1.1                                      |

| Variable<br>(percent unless noted)             | All New<br>Surgeon<br>Patients | Sampled &<br>Matched<br>New<br>Surgeon<br>Patients | Exp. Surgeon Patients Matched for:                |                                 |                     |      | All Exp.<br>After<br>Surgeon<br>Pairing | All Exp.<br>Before<br>Surgeon<br>Pairing |
|------------------------------------------------|--------------------------------|----------------------------------------------------|---------------------------------------------------|---------------------------------|---------------------|------|-----------------------------------------|------------------------------------------|
|                                                |                                |                                                    | Year +<br>Operation +<br>Emerg. +<br>Risk Factors | Year +<br>Operation +<br>Emerg. | Year +<br>Operation | Year |                                         |                                          |
| Thyroidectomy Substernal                       | --*                            | --*                                                | --*                                               | --*                             | --*                 | 0.1  | 0.1                                     | 0.2                                      |
| Thyroidectomy Total                            | 0.4                            | 0.5                                                | 0.5                                               | 0.5                             | 0.5                 | 0.9  | 0.8                                     | 1.7                                      |
| Ulcer                                          | 1.4                            | 1.4                                                | 1.4                                               | 1.4                             | 1.4                 | 1.2  | 1.0                                     | 0.9                                      |
| <b>Emergent Admission</b>                      | 51.3                           | 52.7                                               | 52.7                                              | 52.7                            | 44.9                | 40.5 | 39.7                                    | 37.9                                     |
| <b>Risk Factors &amp; Patient Demographics</b> |                                |                                                    |                                                   |                                 |                     |      |                                         |                                          |
| Age at Admission (years, mean)                 | 77.1                           | 77.0                                               | 77.0                                              | 76.9                            | 76.9                | 76.6 | 76.8                                    | 76.6                                     |
| Age 65-69                                      | 21.6                           | 21.6                                               | 21.7                                              | 22.3                            | 22.1                | 23.0 | 22.3                                    | 23.3                                     |
| Age 70-74                                      | 22.9                           | 23.6                                               | 23.2                                              | 23.0                            | 23.8                | 24.6 | 23.7                                    | 24.0                                     |
| Age 75-79                                      | 20.7                           | 20.4                                               | 20.9                                              | 21.1                            | 21.1                | 20.9 | 21.1                                    | 20.8                                     |
| Age 80-84                                      | 18.1                           | 17.9                                               | 17.9                                              | 17.9                            | 17.4                | 16.9 | 17.4                                    | 17.0                                     |
| Age 85+                                        | 16.7                           | 16.5                                               | 16.3                                              | 15.7                            | 15.5                | 14.6 | 15.6                                    | 14.9                                     |
| Sex (% female)                                 | 56.2                           | 56.5                                               | 56.8                                              | 56.0                            | 55.5                | 57.1 | 57.2                                    | 58.1                                     |
| Transfer-in                                    | 4.0                            | 3.5                                                | 3.5                                               | 2.9                             | 3.2                 | 3.1  | 2.9                                     | 2.6                                      |
| Past Admission in Last 6 Months                | 29.0                           | 28.7                                               | 27.2                                              | 27.8                            | 27.9                | 27.8 | 27.7                                    | 27.3                                     |
| Admission after 9/30/2010                      | 82.2                           | 86.3                                               | 86.3                                              | 86.3                            | 86.3                | 86.3 | 67.3                                    | 66.9                                     |
| Admission in 2012 or 2013                      | 46.2                           | 53.8                                               | 46.9                                              | 53.6                            | 53.7                | 53.8 | 34.7                                    | 34.9                                     |
| Probability of 30-day Death                    | 6.2                            | 6.2                                                | 6.0                                               | 5.9                             | 5.6                 | 5.4  | 5.2                                     | 5.1                                      |
| Comorbidity Count (mean)                       | 4.3                            | 4.3                                                | 4.2                                               | 4.2                             | 4.2                 | 4.2  | 4.2                                     | 4.2                                      |
| <i>Same-Day Secondary Procedures</i>           |                                |                                                    |                                                   |                                 |                     |      |                                         |                                          |
| Major Operative Therapeutic<br>Comorbidities*  | 42.9                           | 43.5                                               | 42.0                                              | 42.0                            | 42.2                | 42.8 | 41.4                                    | 42.4                                     |
| Congestive Heart Failure                       | 22.5                           | 22.8                                               | 21.1                                              | 20.9                            | 20.9                | 20.3 | 20.0                                    | 19.2                                     |
| Past Myocardial Infarction                     | 11.4                           | 11.2                                               | 9.6                                               | 10.6                            | 11.1                | 10.8 | 10.5                                    | 10.3                                     |
| Past Arrhythmia                                | 30.5                           | 30.7                                               | 29.4                                              | 31.2                            | 31.1                | 31.0 | 29.9                                    | 30.0                                     |
| Angina                                         | 4.3                            | 4.4                                                | 3.1                                               | 4.0                             | 4.1                 | 4.1  | 4.5                                     | 4.4                                      |
| Valvular Disease                               | 23.6                           | 23.5                                               | 21.7                                              | 22.4                            | 22.2                | 21.7 | 22.1                                    | 22.2                                     |
| Unstable Angina                                | 2.5                            | 2.3                                                | 1.8                                               | 2.6                             | 2.7                 | 2.5  | 2.5                                     | 2.3                                      |
| Hypertension                                   | 85.5                           | 85.3                                               | 85.1                                              | 84.0                            | 84.3                | 84.6 | 84.4                                    | 84.4                                     |
| Diabetes                                       | 35.7                           | 35.4                                               | 35.7                                              | 34.9                            | 35.1                | 35.2 | 34.5                                    | 35.0                                     |
| Renal Dysfunction                              | 27.9                           | 28.2                                               | 27.2                                              | 25.3                            | 24.6                | 24.6 | 22.9                                    | 22.6                                     |
| Renal Failure                                  | 6.7                            | 6.5                                                | 5.8                                               | 6.1                             | 6.2                 | 6.2  | 5.8                                     | 5.9                                      |
| Liver Disease                                  | 16.1                           | 16.3                                               | 16.1                                              | 17.0                            | 16.9                | 16.4 | 16.3                                    | 16.9                                     |
| Cancer                                         | 43.5                           | 43.7                                               | 46.8                                              | 47.1                            | 47.5                | 49.3 | 50.0                                    | 52.2                                     |
| Specific Abdominal Cancer                      | 3.2                            | 3.1                                                | 3.8                                               | 3.3                             | 3.4                 | 4.6  | 5.3                                     | 6.5                                      |
| Dementia                                       | 13.3                           | 13.3                                               | 11.6                                              | 11.5                            | 11.3                | 11.0 | 10.8                                    | 10.5                                     |
| Stroke                                         | 13.7                           | 14.0                                               | 12.1                                              | 14.0                            | 13.5                | 13.2 | 12.4                                    | 12.0                                     |
| Seizure                                        | 2.0                            | 2.1                                                | 1.4                                               | 2.0                             | 1.9                 | 2.2  | 1.9                                     | 1.8                                      |
| Paraplegia                                     | 2.7                            | 2.7                                                | 1.7                                               | 2.6                             | 2.5                 | 2.5  | 2.3                                     | 2.1                                      |
| COPD                                           | 29.2                           | 28.6                                               | 27.6                                              | 28.4                            | 28.5                | 28.3 | 27.6                                    | 26.5                                     |
| Asthma                                         | 9.6                            | 9.4                                                | 9.9                                               | 10.0                            | 10.3                | 10.4 | 9.9                                     | 10.1                                     |
| Post-inflammatory Pulmonary Fibrosis           | 3.8                            | 3.9                                                | 3.7                                               | 4.0                             | 3.8                 | 3.9  | 3.7                                     | 3.5                                      |

| Variable<br>(percent unless noted) | All New<br>Surgeon<br>Patients | Sampled &<br>Matched<br>New<br>Surgeon<br>Patients | Exp. Surgeon Patients Matched for:                |                                |                     |      | All Exp.<br>After<br>Surgeon<br>Pairing | All Exp.<br>Before<br>Surgeon<br>Pairing |
|------------------------------------|--------------------------------|----------------------------------------------------|---------------------------------------------------|--------------------------------|---------------------|------|-----------------------------------------|------------------------------------------|
|                                    |                                |                                                    | Year +<br>Operation +<br>Emerg. +<br>Risk Factors | Year +<br>Operation+<br>Emerg. | Year +<br>Operation | Year |                                         |                                          |
| Hypothyroidism                     | 23.2                           | <b>23.3</b>                                        | <b>24.8</b>                                       | 23.7                           | 23.8                | 23.2 | 23.4                                    | 24.0                                     |
| Thrombocytopenia                   | 3.3                            | <b>3.1</b>                                         | <b>3.6</b>                                        | 3.4                            | 3.5                 | 3.3  | 3.2                                     | 3.4                                      |
| Collagen Vascular Disease          | 6.3                            | <b>6.1</b>                                         | <b>6.4</b>                                        | 6.7                            | 6.6                 | 6.8  | 6.3                                     | 6.4                                      |
| AIDS                               | 0.1                            | --*                                                | --*                                               | --*                            | --*                 | --*  | 0.1                                     | 0.1                                      |
| Chronic Peptic Ulcer               | 0.3                            | <b>0.3</b>                                         | <b>0.3</b>                                        | 0.2                            | 0.2                 | 0.2  | 0.3                                     | 0.3                                      |
| Coagulopathy                       | 0.5                            | <b>0.4</b>                                         | <b>0.5</b>                                        | 0.4                            | 0.5                 | 0.4  | 0.4                                     | 0.5                                      |
| Other Coagulopathy                 | 4.8                            | <b>4.9</b>                                         | <b>5.1</b>                                        | 4.7                            | 4.6                 | 4.7  | 4.5                                     | 4.9                                      |
| Cushing's Disease                  | 0.1                            | --*                                                | <b>0.1</b>                                        | 0.1                            | 0.1                 | 0.1  | 0.1                                     | 0.1                                      |
| Graves' Disease                    | 0.4                            | <b>0.4</b>                                         | <b>0.4</b>                                        | 0.3                            | 0.4                 | 0.5  | 0.4                                     | 0.5                                      |
| Hemoglobin Disorder                | --*                            | --*                                                | --*                                               | --*                            | --*                 | --*  | 0.0                                     | 0.0                                      |



eTable 6b. Step Table for Orthopedic Surgery

| Variable<br>(percent unless noted)                   | All New<br>Surgeon<br>Patients | Sampled &<br>Matched<br>New<br>Surgeon<br>Patients | Exp. Surgeon Patients Matched for:                |                               |                     |               | All Exp.<br>After<br>Surgeon<br>Pairing | All Exp.<br>Before<br>Surgeon<br>Pairing |
|------------------------------------------------------|--------------------------------|----------------------------------------------------|---------------------------------------------------|-------------------------------|---------------------|---------------|-----------------------------------------|------------------------------------------|
|                                                      |                                |                                                    | Year +<br>Operation +<br>Emerg. +<br>Risk Factors | Year +<br>Operation+<br>Emerg | Year +<br>Operation | Year          |                                         |                                          |
| Number of Surgeons                                   | 1,092                          | 826                                                | 826                                               | 826                           | 826                 | 826           | 826                                     | 4,179                                    |
| Number of Patients                                   | 39,500                         | 8,260                                              | 8,260                                             | 8,260                         | 8,260               | 8,260         | 131,045                                 | 474,028                                  |
| <b>Year of admission (mean)</b>                      | 2011.4                         | <b>2011.6</b>                                      | <b>2011.5</b>                                     | <b>2011.6</b>                 | <b>2011.6</b>       | <b>2011.6</b> | 2011.0                                  | 2011.0                                   |
| <b>Principal Procedure Categories</b>                |                                |                                                    |                                                   |                               |                     |               |                                         |                                          |
| Hip Repair                                           | 23.2                           | <b>29.7</b>                                        | <b>29.7</b>                                       | <b>29.7</b>                   | <b>29.7</b>         | 17.1          | 10.4                                    | 9.0                                      |
| Hip Replacement                                      | 46.8                           | <b>50.1</b>                                        | <b>50.1</b>                                       | <b>50.1</b>                   | <b>50.1</b>         | 37.4          | 35.5                                    | 33.4                                     |
| Hip Replacement Revision                             | 3.7                            | <b>2.0</b>                                         | <b>2.0</b>                                        | <b>2.0</b>                    | <b>2.0</b>          | 3.0           | 3.5                                     | 3.2                                      |
| Knee Replacement                                     | 23.2                           | <b>16.8</b>                                        | <b>16.8</b>                                       | <b>16.8</b>                   | <b>16.8</b>         | 39.8          | 47.3                                    | 51.0                                     |
| Knee Replacement Revision                            | 3.1                            | <b>1.5</b>                                         | <b>1.5</b>                                        | <b>1.5</b>                    | <b>1.5</b>          | 2.8           | 3.4                                     | 3.5                                      |
| <b>Emergent Admission</b>                            | 44.3                           | <b>55.3</b>                                        | <b>55.3</b>                                       | <b>55.3</b>                   | 40.8                | 27.8          | 18.2                                    | 16.1                                     |
| <b>Risk Factors &amp; Patient Demographics</b>       |                                |                                                    |                                                   |                               |                     |               |                                         |                                          |
| Age at Admission (years, mean)                       | 79.9                           | <b>81.3</b>                                        | <b>81.7</b>                                       | 80.8                          | 79.9                | 78.0          | 77.1                                    | 76.7                                     |
| Age 65-69                                            | 15.5                           | <b>11.9</b>                                        | <b>11.2</b>                                       | 13.1                          | 15.1                | 19.8          | 21.3                                    | 22.4                                     |
| Age 70-74                                            | 17.4                           | <b>15.0</b>                                        | <b>14.3</b>                                       | 16.1                          | 18.0                | 21.8          | 24.0                                    | 24.8                                     |
| Age 75-79                                            | 17.8                           | <b>16.6</b>                                        | <b>16.2</b>                                       | 16.8                          | 17.5                | 19.5          | 21.3                                    | 21.4                                     |
| Age 80-84                                            | 18.9                           | <b>19.7</b>                                        | <b>19.2</b>                                       | 19.9                          | 19.8                | 17.2          | 16.8                                    | 16.3                                     |
| Age 85+                                              | 30.4                           | <b>36.9</b>                                        | <b>39.2</b>                                       | 34.0                          | 29.6                | 21.7          | 16.6                                    | 15.1                                     |
| Sex (% female)                                       | 68.8                           | <b>70.9</b>                                        | <b>70.7</b>                                       | 70.5                          | 69.7                | 67.5          | 65.9                                    | 65.3                                     |
| Transfer-in                                          | 1.5                            | <b>1.3</b>                                         | <b>1.3</b>                                        | 0.7                           | 1.0                 | 0.7           | 0.7                                     | 0.6                                      |
| Past Admission in Last 6 Months                      | 20.4                           | <b>21.9</b>                                        | <b>20.4</b>                                       | 20.5                          | 19.4                | 17.1          | 14.7                                    | 13.7                                     |
| Admission after 9/30/2010                            | 86.3                           | <b>88.7</b>                                        | <b>88.7</b>                                       | 88.7                          | 88.7                | 88.7          | 69.2                                    | 69.1                                     |
| Admission in 2012 or 2013                            | 49.8                           | <b>56.3</b>                                        | <b>53.1</b>                                       | 56.3                          | 56.3                | 56.3          | 37.7                                    | 38.4                                     |
| Probability of 30-day Death                          | 3.8                            | <b>4.8</b>                                         | <b>4.9</b>                                        | 4.3                           | 3.7                 | 2.6           | 1.8                                     | 1.6                                      |
| Comorbidity Count (mean)                             | 3.7                            | <b>4.0</b>                                         | <b>3.9</b>                                        | 3.8                           | 3.7                 | 3.5           | 3.2                                     | 3.1                                      |
| <i>Same-Day Secondary Procedures</i>                 |                                |                                                    |                                                   |                               |                     |               |                                         |                                          |
| Major Operative Therapeutic<br><i>Comorbidities*</i> | 7.0                            | <b>6.6</b>                                         | <b>5.9</b>                                        | 5.9                           | 6.0                 | 6.9           | 7.7                                     | 7.1                                      |
| Congestive Heart Failure                             | 19.0                           | <b>21.5</b>                                        | <b>21.9</b>                                       | 20.0                          | 18.6                | 15.8          | 12.5                                    | 11.5                                     |
| Past Myocardial Infarction                           | 8.9                            | <b>9.4</b>                                         | <b>8.6</b>                                        | 9.0                           | 8.7                 | 7.9           | 7.1                                     | 6.9                                      |
| Past Arrhythmia                                      | 28.3                           | <b>30.3</b>                                        | <b>30.2</b>                                       | 29.1                          | 28.8                | 27.0          | 25.3                                    | 25.1                                     |
| Angina                                               | 3.0                            | <b>3.4</b>                                         | <b>2.7</b>                                        | 2.9                           | 3.0                 | 3.2           | 2.9                                     | 2.9                                      |
| Valvular Disease                                     | 22.4                           | <b>24.3</b>                                        | <b>24.3</b>                                       | 23.4                          | 22.5                | 20.1          | 18.3                                    | 18.1                                     |
| Unstable Angina                                      | 1.2                            | <b>1.3</b>                                         | <b>0.8</b>                                        | 1.1                           | 1.2                 | 1.2           | 1.0                                     | 0.9                                      |
| Hypertension                                         | 86.0                           | <b>86.8</b>                                        | <b>87.1</b>                                       | 86.4                          | 86.1                | 86.0          | 84.9                                    | 84.5                                     |
| Diabetes                                             | 29.0                           | <b>29.0</b>                                        | <b>29.7</b>                                       | 28.3                          | 28.1                | 28.5          | 27.7                                    | 27.4                                     |
| Renal Dysfunction                                    | 19.0                           | <b>21.6</b>                                        | <b>21.9</b>                                       | 19.4                          | 17.8                | 16.1          | 12.8                                    | 12.2                                     |
| Renal Failure                                        | 3.9                            | <b>4.4</b>                                         | <b>4.0</b>                                        | 4.0                           | 3.7                 | 3.0           | 2.6                                     | 2.4                                      |
| Liver Disease                                        | 3.5                            | <b>3.9</b>                                         | <b>3.2</b>                                        | 3.3                           | 3.3                 | 3.1           | 3.1                                     | 3.1                                      |
| Cancer                                               | 26.4                           | <b>26.7</b>                                        | <b>27.1</b>                                       | 25.7                          | 25.6                | 25.9          | 25.8                                    | 26.1                                     |
| Specific Abdominal Cancer                            | 0.4                            | <b>0.5</b>                                         | <b>0.4</b>                                        | 0.4                           | 0.4                 | 0.2           | 0.2                                     | 0.2                                      |

| Variable<br>(percent unless noted)   | All New<br>Surgeon<br>Patients | Sampled &<br>Matched<br>New<br>Surgeon<br>Patients | Exp. Surgeon Patients Matched for:                |                               |                     |      | All Exp.<br>After<br>Surgeon<br>Pairing | All Exp.<br>Before<br>Surgeon<br>Pairing |
|--------------------------------------|--------------------------------|----------------------------------------------------|---------------------------------------------------|-------------------------------|---------------------|------|-----------------------------------------|------------------------------------------|
|                                      |                                |                                                    | Year +<br>Operation +<br>Emerg. +<br>Risk Factors | Year +<br>Operation+<br>Emerg | Year +<br>Operation | Year |                                         |                                          |
| Dementia                             | 24.7                           | <b>30.8</b>                                        | <b>31.3</b>                                       | 26.7                          | 23.2                | 17.1 | 12.2                                    | 10.8                                     |
| Stroke                               | 15.5                           | <b>18.1</b>                                        | <b>17.2</b>                                       | 16.4                          | 14.8                | 12.9 | 10.3                                    | 9.7                                      |
| Seizure                              | 2.3                            | <b>2.6</b>                                         | <b>1.8</b>                                        | 2.3                           | 2.0                 | 1.8  | 1.5                                     | 1.4                                      |
| Paraplegia                           | 2.5                            | <b>3.1</b>                                         | <b>2.4</b>                                        | 2.8                           | 2.5                 | 1.9  | 1.3                                     | 1.2                                      |
| COPD                                 | 23.6                           | <b>25.8</b>                                        | <b>25.0</b>                                       | 24.7                          | 23.8                | 20.9 | 18.5                                    | 17.6                                     |
| Asthma                               | 9.1                            | <b>8.8</b>                                         | <b>8.7</b>                                        | 9.2                           | 9.4                 | 9.9  | 9.8                                     | 9.9                                      |
| Post-inflammatory Pulmonary Fibrosis | 3.4                            | <b>3.8</b>                                         | <b>4.0</b>                                        | 3.5                           | 3.4                 | 3.0  | 2.4                                     | 2.3                                      |
| Hypothyroidism                       | 26.8                           | <b>27.5</b>                                        | <b>24.3</b>                                       | 27.5                          | 26.8                | 25.9 | 25.8                                    | 25.5                                     |
| Thrombocytopenia                     | 2.4                            | <b>2.7</b>                                         | <b>2.4</b>                                        | 2.3                           | 2.2                 | 1.9  | 1.7                                     | 1.6                                      |
| Collagen Vascular Disease            | 8.0                            | <b>7.7</b>                                         | <b>5.8</b>                                        | 8.0                           | 8.2                 | 8.0  | 8.5                                     | 8.6                                      |
| AIDS                                 | 0.1                            | --*                                                | --*                                               | --*                           | --*                 | --*  | 0.0                                     | 0.0                                      |
| Chronic Peptic Ulcer                 | 0.1                            | --*                                                | --*                                               | --*                           | 0.1                 | --*  | 0.1                                     | 0.1                                      |
| Coagulopathy                         | 0.4                            | <b>0.3</b>                                         | <b>0.4</b>                                        | 0.5                           | 0.5                 | 0.4  | 0.5                                     | 0.5                                      |
| Other Coagulopathy                   | 3.7                            | <b>4.0</b>                                         | <b>3.8</b>                                        | 4.0                           | 3.7                 | 3.3  | 3.6                                     | 3.7                                      |
| Cushing's Disease                    | 0.0                            | --*                                                | --*                                               | --*                           | --*                 | --*  | 0.1                                     | 0.0                                      |
| Graves' Disease                      | 0.3                            | <b>0.3</b>                                         | <b>0.2</b>                                        | 0.3                           | 0.2                 | 0.2  | 0.3                                     | 0.3                                      |
| Hemoglobin Disorder                  | --*                            | --*                                                | --*                                               | --*                           | --*                 | --*  | 0.0                                     | 0.0                                      |

**eTable 7. Complete Matching Tables for Year Match** Displays the covariate balance when new and experienced surgeon patients were paired only on year of admission. Covariates not included in the matching algorithm are displayed below the horizontal line.

| Covariate<br>(percent unless noted)    | All New<br>Surgeon<br>Patients<br>before<br>Match | Matched<br>New<br>Surgeon<br>Patients | Matched<br>Exp.<br>Surgeon<br>Patients | All Exp.<br>Surgeon<br>Patients<br>before<br>Match | Stand<br>Diff<br>before<br>Match | P<br>before<br>Match | Stand<br>Diff<br>after<br>Match | P<br>after<br>Match |
|----------------------------------------|---------------------------------------------------|---------------------------------------|----------------------------------------|----------------------------------------------------|----------------------------------|----------------------|---------------------------------|---------------------|
| Number of Surgeons                     |                                                   |                                       |                                        |                                                    |                                  |                      |                                 |                     |
| Number of Patients                     | 18,200                                            | 18,200                                | 18,200                                 | 203,113                                            |                                  |                      |                                 |                     |
| Year of admission (mean)               | 2011.5                                            | 2011.5                                | 2011.5                                 | 2011.0                                             | 0.47                             | <.0001               | 0.00                            | 1.0000              |
| <b>Unmatched Covariates</b>            |                                                   |                                       |                                        |                                                    |                                  |                      |                                 |                     |
| Principal Procedure Categories         |                                                   |                                       |                                        |                                                    |                                  |                      |                                 |                     |
| General Surgery                        |                                                   |                                       |                                        |                                                    |                                  |                      |                                 |                     |
| Adrenalectomy                          | 0.3                                               | 0.3                                   | 0.3                                    | 0.3                                                | 0.00                             | 0.8358               | -0.01                           | 0.6831              |
| Appendectomy                           | 5.3                                               | 5.3                                   | 3.9                                    | 3.9                                                | 0.07                             | <.0001               | 0.07                            | <.0001              |
| Bariatric                              | 0.5                                               | 0.5                                   | 0.8                                    | 0.6                                                | -0.01                            | 0.2398               | -0.04                           | 0.0070              |
| Biliary common duct                    | --*                                               | --*                                   | --*                                    | 0.1                                                | -0.01                            | 0.6182               | -0.01                           | 1.0000              |
| Biliary other                          | --*                                               | --*                                   | 0.3                                    | 0.4                                                | -0.06                            | <.0001               | -0.05                           | 0.0001              |
| Cholecystectomy                        | 29.8                                              | 29.8                                  | 24.5                                   | 25.4                                               | 0.10                             | <.0001               | 0.12                            | <.0001              |
| Colectomy Partial – Lap                | 9.1                                               | 9.1                                   | 9.0                                    | 10.0                                               | -0.03                            | 0.0044               | 0.00                            | 0.8821              |
| Colectomy Partial – Open               | 18.0                                              | 18.0                                  | 18.2                                   | 17.7                                               | 0.01                             | 0.4414               | 0.00                            | 0.7966              |
| Colectomy Total – Lap                  | 0.3                                               | 0.3                                   | 0.2                                    | 0.2                                                | 0.02                             | 0.0570               | 0.02                            | 0.1169              |
| Colectomy Total – Open                 | 1.2                                               | 1.2                                   | 1.2                                    | 1.0                                                | 0.02                             | 0.1033               | 0.00                            | 1.0000              |
| Esophagectomy                          | --*                                               | --*                                   | 0.1                                    | 0.2                                                | -0.03                            | 0.0157               | -0.02                           | 0.2377              |
| Esophagomyotomy                        | --*                                               | --*                                   | 0.2                                    | 0.2                                                | -0.02                            | 0.0563               | -0.01                           | 0.4241              |
| Hernia Abdominal – Lap                 | 1.5                                               | 1.5                                   | 1.3                                    | 1.3                                                | 0.01                             | 0.3790               | 0.01                            | 0.3936              |
| Hernia Abdominal – Open                | 3.3                                               | 3.3                                   | 5.6                                    | 5.3                                                | -0.10                            | <.0001               | -0.11                           | <.0001              |
| Hernia Groin – Lap                     | 0.4                                               | 0.4                                   | 0.3                                    | 0.5                                                | -0.01                            | 0.2948               | 0.01                            | 0.7197              |
| Hernia Groin – Open                    | 3.6                                               | 3.6                                   | 3.4                                    | 3.2                                                | 0.02                             | 0.0608               | 0.01                            | 0.5878              |
| Large Bowel Other                      | 0.8                                               | 0.8                                   | 0.8                                    | 0.8                                                | 0.00                             | 1.0000               | 0.01                            | 0.7502              |
| Liver Other                            | --*                                               | --*                                   | 0.1                                    | 0.1                                                | -0.03                            | 0.0188               | -0.05                           | 0.0034              |
| Liver Partial Hepatectomy              | 0.3                                               | 0.3                                   | 0.5                                    | 0.7                                                | -0.05                            | <.0001               | -0.03                           | 0.0235              |
| Lysis of Adhesions                     | 5.6                                               | 5.6                                   | 5.6                                    | 5.1                                                | 0.02                             | 0.0274               | 0.00                            | 0.9261              |
| Mastectomy                             | 1.4                                               | 1.4                                   | 3.0                                    | 2.6                                                | -0.09                            | <.0001               | -0.12                           | <.0001              |
| Pancreatectomy                         | 0.7                                               | 0.7                                   | 1.7                                    | 1.8                                                | -0.09                            | <.0001               | -0.09                           | <.0001              |
| Parathyroidectomy                      | 0.3                                               | 0.3                                   | 0.7                                    | 0.8                                                | -0.06                            | <.0001               | -0.05                           | 0.0002              |
| PD Access Procedure                    | 0.3                                               | 0.3                                   | 0.3                                    | 0.3                                                | 0.01                             | 0.4042               | 0.00                            | 0.8955              |
| Proctectomy                            | 2.9                                               | 2.9                                   | 2.9                                    | 3.1                                                | -0.01                            | 0.2904               | 0.00                            | 0.8329              |
| Proctopexy                             | 0.1                                               | 0.1                                   | 0.1                                    | 0.1                                                | 0.00                             | 0.8702               | 0.00                            | 1.0000              |
| Pyloroplasty                           | 0.2                                               | 0.2                                   | 0.1                                    | 0.1                                                | 0.01                             | 0.3695               | 0.01                            | 0.5713              |
| Small Bowel Other                      | 0.8                                               | 0.8                                   | 0.8                                    | 0.7                                                | 0.00                             | 0.6610               | 0.00                            | 0.8719              |
| Small Bowel Resection                  | 8.3                                               | 8.3                                   | 6.9                                    | 6.6                                                | 0.07                             | <.0001               | 0.05                            | 0.0003              |
| Splenectomy                            | 0.7                                               | 0.7                                   | 1.0                                    | 0.8                                                | -0.01                            | 0.2853               | -0.03                           | 0.0384              |
| Stomach Anti-Reflux                    | 0.3                                               | 0.3                                   | 0.7                                    | 1.0                                                | -0.09                            | <.0001               | -0.06                           | <.0001              |
| Stomach Gastric Bypass (non-bariatric) | 0.3                                               | 0.3                                   | 0.5                                    | 0.5                                                | -0.03                            | 0.0090               | -0.03                           | 0.0742              |
| Stomach Other                          | 0.3                                               | 0.3                                   | 0.4                                    | 0.3                                                | -0.01                            | 0.5090               | -0.01                           | 0.4492              |
| Stomach Partial Gastrectomy            | 1.0                                               | 1.0                                   | 1.4                                    | 1.5                                                | -0.04                            | 0.0002               | -0.04                           | 0.0076              |
| Stomach Total Gastrectomy              | --*                                               | --*                                   | 0.3                                    | 0.4                                                | -0.07                            | <.0001               | -0.04                           | 0.0005              |
| Thyroidectomy Partial                  | 0.3                                               | 0.3                                   | 0.6                                    | 0.6                                                | -0.06                            | <.0001               | -0.06                           | 0.0001              |
| Thyroidectomy Substernal               | --*                                               | --*                                   | 0.1                                    | 0.1                                                | -0.01                            | 0.4359               | -0.02                           | 0.2099              |
| Thyroidectomy Total                    | 0.5                                               | 0.5                                   | 0.9                                    | 0.8                                                | -0.04                            | 0.0001               | -0.06                           | 0.0001              |
| Ulcer                                  | 1.4                                               | 1.4                                   | 1.2                                    | 1.0                                                | 0.04                             | 0.0004               | 0.02                            | 0.1478              |
| Orthopedic Surgery                     |                                                   |                                       |                                        |                                                    |                                  |                      |                                 |                     |
| Hip Repair                             | 29.7                                              | 29.7                                  | 17.1                                   | 10.4                                               | 0.50                             | <.0001               | 0.32                            | <.0001              |
| Hip Replacement                        | 50.1                                              | 50.1                                  | 37.4                                   | 35.5                                               | 0.30                             | <.0001               | 0.26                            | <.0001              |
| Hip Replacement Revision               | 2.0                                               | 2.0                                   | 3.0                                    | 3.5                                                | -0.09                            | <.0001               | -0.06                           | 0.0001              |
| Knee Replacement                       | 16.8                                              | 16.8                                  | 39.8                                   | 47.3                                               | -0.69                            | <.0001               | -0.52                           | <.0001              |
| Knee Replacement Revision              | 1.5                                               | 1.5                                   | 2.8                                    | 3.4                                                | -0.13                            | <.0001               | -0.09                           | <.0001              |
| Emergent Admission                     | 53.9                                              | 53.9                                  | 34.7                                   | 25.8                                               | 0.60                             | <.0001               | 0.41                            | <.0001              |
| Risk Factors & Patient Demographics    |                                                   |                                       |                                        |                                                    |                                  |                      |                                 |                     |

| Covariate<br>(percent unless noted)  | All New<br>Surgeon<br>Patients<br>before<br>Match | Matched<br>New<br>Surgeon<br>Patients | Matched<br>Exp.<br>Surgeon<br>Patients | All Exp.<br>Surgeon<br>Patients<br>before<br>Match | Stand<br>Diff<br>before<br>Match | P<br>before<br>Match | Stand<br>Diff<br>after<br>Match | P<br>after<br>Match |
|--------------------------------------|---------------------------------------------------|---------------------------------------|----------------------------------------|----------------------------------------------------|----------------------------------|----------------------|---------------------------------|---------------------|
| Age at Admission (years, mean)       | 79.0                                              | 79.0                                  | 77.2                                   | 77.0                                               | 0.25                             | <.0001               | 0.22                            | <.0001              |
| Age 65-69                            | 17.2                                              | 17.2                                  | 21.6                                   | 21.6                                               | -0.11                            | <.0001               | -0.11                           | <.0001              |
| Age 70-74                            | 19.7                                              | 19.7                                  | 23.4                                   | 23.9                                               | -0.10                            | <.0001               | -0.09                           | <.0001              |
| Age 75-79                            | 18.7                                              | 18.7                                  | 20.3                                   | 21.2                                               | -0.06                            | <.0001               | -0.04                           | 0.0002              |
| Age 80-84                            | 18.7                                              | 18.7                                  | 17.0                                   | 17.0                                               | 0.04                             | <.0001               | 0.04                            | <.0001              |
| Age 85+                              | 25.8                                              | 25.8                                  | 17.8                                   | 16.3                                               | 0.24                             | <.0001               | 0.20                            | <.0001              |
| Sex (% female)                       | 63.0                                              | 63.0                                  | 61.8                                   | 62.8                                               | 0.00                             | 0.5862               | 0.02                            | 0.0188              |
| Transfer-in                          | 2.5                                               | 2.5                                   | 2.0                                    | 1.5                                                | 0.08                             | <.0001               | 0.04                            | 0.0009              |
| Past Admission in Last 6 Months      | 25.6                                              | 25.6                                  | 22.9                                   | 19.3                                               | 0.15                             | <.0001               | 0.07                            | <.0001              |
| Admission after 9/30/2010            | 87.4                                              | 87.4                                  | 87.4                                   | 68.5                                               | 0.47                             | <.0001               | 0.00                            | 1.0000              |
| Admission in 2012 or 2013            | 54.9                                              | 54.9                                  | 54.9                                   | 36.6                                               | 0.37                             | <.0001               | 0.00                            | 1.0000              |
| Probability of 30-day Death          | 5.6                                               | 5.6                                   | 4.2                                    | 3.0                                                | 0.35                             | <.0001               | 0.19                            | <.0001              |
| Comorbidity Count (mean)             | 4.1                                               | 4.1                                   | 3.9                                    | 3.5                                                | 0.26                             | <.0001               | 0.12                            | <.0001              |
| Same-Day Secondary Procedures        |                                                   |                                       |                                        |                                                    |                                  |                      |                                 |                     |
| Major Operative Therapeutic          | 26.7                                              | 26.7                                  | 26.5                                   | 19.7                                               | 0.17                             | <.0001               | 0.01                            | 0.6608              |
| Comorbidities                        |                                                   |                                       |                                        |                                                    |                                  |                      |                                 |                     |
| Congestive Heart Failure             | 22.2                                              | 22.2                                  | 18.2                                   | 15.2                                               | 0.18                             | <.0001               | 0.10                            | <.0001              |
| Past Myocardial Infarction           | 10.4                                              | 10.4                                  | 9.5                                    | 8.3                                                | 0.07                             | <.0001               | 0.03                            | 0.0036              |
| Past Arrhythmia                      | 30.5                                              | 30.5                                  | 29.2                                   | 26.9                                               | 0.08                             | <.0001               | 0.03                            | 0.0050              |
| Angina                               | 4.0                                               | 4.0                                   | 3.7                                    | 3.5                                                | 0.02                             | 0.0012               | 0.01                            | 0.2303              |
| Valvular Disease                     | 23.9                                              | 23.9                                  | 21.0                                   | 19.6                                               | 0.10                             | <.0001               | 0.07                            | <.0001              |
| Unstable Angina                      | 1.8                                               | 1.8                                   | 1.9                                    | 1.5                                                | 0.02                             | 0.0015               | -0.01                           | 0.4875              |
| Hypertension                         | 86.0                                              | 86.0                                  | 85.2                                   | 84.7                                               | 0.04                             | <.0001               | 0.02                            | 0.0304              |
| Diabetes                             | 32.5                                              | 32.5                                  | 32.2                                   | 30.1                                               | 0.05                             | <.0001               | 0.01                            | 0.5014              |
| Renal Dysfunction                    | 25.2                                              | 25.2                                  | 20.8                                   | 16.4                                               | 0.22                             | <.0001               | 0.11                            | <.0001              |
| Renal Failure                        | 5.6                                               | 5.6                                   | 4.8                                    | 3.7                                                | 0.09                             | <.0001               | 0.04                            | 0.0004              |
| Liver Disease                        | 10.7                                              | 10.7                                  | 10.4                                   | 7.8                                                | 0.10                             | <.0001               | 0.01                            | 0.3055              |
| Cancer                               | 36.0                                              | 36.0                                  | 38.7                                   | 34.4                                               | 0.03                             | <.0001               | -0.06                           | <.0001              |
| Specific Abdominal Cancer            | 1.9                                               | 1.9                                   | 2.6                                    | 2.0                                                | -0.01                            | 0.4093               | -0.05                           | <.0001              |
| Dementia                             | 21.2                                              | 21.2                                  | 13.8                                   | 11.7                                               | 0.26                             | <.0001               | 0.20                            | <.0001              |
| Stroke                               | 15.9                                              | 15.9                                  | 13.0                                   | 11.0                                               | 0.14                             | <.0001               | 0.08                            | <.0001              |
| Seizure                              | 2.3                                               | 2.3                                   | 2.0                                    | 1.6                                                | 0.05                             | <.0001               | 0.02                            | 0.0571              |
| Paraplegia                           | 2.9                                               | 2.9                                   | 2.2                                    | 1.7                                                | 0.08                             | <.0001               | 0.04                            | 0.0001              |
| COPD                                 | 27.3                                              | 27.3                                  | 24.9                                   | 21.7                                               | 0.13                             | <.0001               | 0.06                            | <.0001              |
| Asthma                               | 9.1                                               | 9.1                                   | 10.1                                   | 9.8                                                | -0.02                            | 0.0021               | -0.04                           | 0.0009              |
| Post-inflammatory Pulmonary Fibrosis | 3.9                                               | 3.9                                   | 3.5                                    | 2.8                                                | 0.06                             | <.0001               | 0.02                            | 0.0414              |
| Hypothyroidism                       | 25.2                                              | 25.2                                  | 24.5                                   | 25.0                                               | 0.01                             | 0.4475               | 0.02                            | 0.0941              |
| Thrombocytopenia                     | 2.9                                               | 2.9                                   | 2.6                                    | 2.3                                                | 0.04                             | <.0001               | 0.02                            | 0.1111              |
| Collagen Vascular Disease            | 6.8                                               | 6.8                                   | 7.4                                    | 7.7                                                | -0.04                            | <.0001               | -0.02                           | 0.0429              |
| AIDS                                 | 0.1                                               | 0.1                                   | 0.1                                    | 0.1                                                | 0.01                             | 0.0569               | 0.01                            | 0.5845              |
| Chronic Peptic Ulcer                 | 0.2                                               | 0.2                                   | 0.2                                    | 0.2                                                | 0.01                             | 0.2543               | 0.01                            | 0.7160              |
| Coagulopathy                         | 0.4                                               | 0.4                                   | 0.4                                    | 0.5                                                | -0.01                            | 0.1639               | 0.00                            | 1.0000              |
| Other Coagulopathy                   | 4.5                                               | 4.5                                   | 4.1                                    | 3.9                                                | 0.03                             | 0.0002               | 0.02                            | 0.0823              |
| Cushing's Disease                    | 0.1                                               | 0.1                                   | 0.1                                    | 0.1                                                | 0.00                             | 0.7697               | -0.02                           | 0.1100              |
| Graves' Disease                      | 0.4                                               | 0.4                                   | 0.4                                    | 0.3                                                | 0.00                             | 0.7414               | 0.00                            | 1.0000              |
| Hemoglobin Disorder                  | --*                                               | --*                                   | --*                                    | 0.0                                                | 0.00                             | 1.0000               | 0.00                            | 1.0000              |

Cells marked "--\*" are masked to comply with CMS cell size suppression rules.

P-values calculated using group tests, with Fisher's exact test used for binary and Wilcoxon rank sum used for continuous variables.

**eTable 7a. General Surgery Year Match**

| Covariate<br>(percent unless noted)            | All New<br>Surgeon<br>Patients<br>before<br>Match | Matched<br>New<br>Surgeon<br>Patients | Matched<br>Exp.<br>Surgeon<br>Patients | All Exp.<br>Surgeon<br>Patients<br>before<br>Match | Stand<br>Diff<br>before<br>Match | P<br>before<br>Match | Stand<br>Diff<br>after<br>Match | P<br>after<br>Match |
|------------------------------------------------|---------------------------------------------------|---------------------------------------|----------------------------------------|----------------------------------------------------|----------------------------------|----------------------|---------------------------------|---------------------|
| Number of Surgeons                             |                                                   |                                       |                                        |                                                    |                                  |                      |                                 |                     |
| Number of Patients                             | 9,940                                             | 9,940                                 | 9,940                                  | 72,068                                             |                                  |                      |                                 |                     |
| Year of admission (mean)                       | 2011.5                                            | 2011.5                                | 2011.5                                 | 2010.9                                             | 0.48                             | <.0001               | 0.00                            | 1.0000              |
| <b>Unmatched Covariates</b>                    |                                                   |                                       |                                        |                                                    |                                  |                      |                                 |                     |
| <b>Principal Procedure Categories</b>          |                                                   |                                       |                                        |                                                    |                                  |                      |                                 |                     |
| Adrenalectomy                                  | 0.3                                               | 0.3                                   | 0.3                                    | 0.3                                                | 0.00                             | 0.8358               | -0.01                           | 0.6831              |
| Appendectomy                                   | 5.3                                               | 5.3                                   | 3.9                                    | 3.9                                                | 0.07                             | <.0001               | 0.07                            | <.0001              |
| Bariatric                                      | 0.5                                               | 0.5                                   | 0.8                                    | 0.6                                                | -0.01                            | 0.2398               | -0.04                           | 0.0070              |
| Biliary common duct                            | --*                                               | --*                                   | --*                                    | 0.1                                                | -0.01                            | 0.6182               | -0.01                           | 1.0000              |
| Biliary other                                  | --*                                               | --*                                   | 0.3                                    | 0.4                                                | -0.06                            | <.0001               | -0.05                           | 0.0001              |
| Cholecystectomy                                | 29.8                                              | 29.8                                  | 24.5                                   | 25.4                                               | 0.10                             | <.0001               | 0.12                            | <.0001              |
| Colectomy Partial – Lap                        | 9.1                                               | 9.1                                   | 9.0                                    | 10.0                                               | -0.03                            | 0.0044               | 0.00                            | 0.8821              |
| Colectomy Partial – Open                       | 18.0                                              | 18.0                                  | 18.2                                   | 17.7                                               | 0.01                             | 0.4414               | 0.00                            | 0.7966              |
| Colectomy Total – Lap                          | 0.3                                               | 0.3                                   | 0.2                                    | 0.2                                                | 0.02                             | 0.0570               | 0.02                            | 0.1169              |
| Colectomy Total – Open                         | 1.2                                               | 1.2                                   | 1.2                                    | 1.0                                                | 0.02                             | 0.1033               | 0.00                            | 1.0000              |
| Esophagectomy                                  | --*                                               | --*                                   | 0.1                                    | 0.2                                                | -0.03                            | 0.0157               | -0.02                           | 0.2377              |
| Esophagomyotomy                                | --*                                               | --*                                   | 0.2                                    | 0.2                                                | -0.02                            | 0.0563               | -0.01                           | 0.4241              |
| Hernia Abdominal – Lap                         | 1.5                                               | 1.5                                   | 1.3                                    | 1.3                                                | 0.01                             | 0.3790               | 0.01                            | 0.3936              |
| Hernia Abdominal – Open                        | 3.3                                               | 3.3                                   | 5.6                                    | 5.3                                                | -0.10                            | <.0001               | -0.11                           | <.0001              |
| Hernia Groin – Lap                             | 0.4                                               | 0.4                                   | 0.3                                    | 0.5                                                | -0.01                            | 0.2948               | 0.01                            | 0.7197              |
| Hernia Groin – Open                            | 3.6                                               | 3.6                                   | 3.4                                    | 3.2                                                | 0.02                             | 0.0608               | 0.01                            | 0.5878              |
| Large Bowel Other                              | 0.8                                               | 0.8                                   | 0.8                                    | 0.8                                                | 0.00                             | 1.0000               | 0.01                            | 0.7502              |
| Liver Other                                    | --*                                               | --*                                   | 0.1                                    | 0.1                                                | -0.03                            | 0.0188               | -0.05                           | 0.0034              |
| Liver Partial Hepatectomy                      | 0.3                                               | 0.3                                   | 0.5                                    | 0.7                                                | -0.05                            | <.0001               | -0.03                           | 0.0235              |
| Lysis of Adhesions                             | 5.6                                               | 5.6                                   | 5.6                                    | 5.1                                                | 0.02                             | 0.0274               | 0.00                            | 0.9261              |
| Mastectomy                                     | 1.4                                               | 1.4                                   | 3.0                                    | 2.6                                                | -0.09                            | <.0001               | -0.12                           | <.0001              |
| Pancreatectomy                                 | 0.7                                               | 0.7                                   | 1.7                                    | 1.8                                                | -0.09                            | <.0001               | -0.09                           | <.0001              |
| Parathyroidectomy                              | 0.3                                               | 0.3                                   | 0.7                                    | 0.8                                                | -0.06                            | <.0001               | -0.05                           | 0.0002              |
| PD Access Procedure                            | 0.3                                               | 0.3                                   | 0.3                                    | 0.3                                                | 0.01                             | 0.4042               | 0.00                            | 0.8955              |
| Proctectomy                                    | 2.9                                               | 2.9                                   | 2.9                                    | 3.1                                                | -0.01                            | 0.2904               | 0.00                            | 0.8329              |
| Proctopexy                                     | 0.1                                               | 0.1                                   | 0.1                                    | 0.1                                                | 0.00                             | 0.8702               | 0.00                            | 1.0000              |
| Pyloroplasty                                   | 0.2                                               | 0.2                                   | 0.1                                    | 0.1                                                | 0.01                             | 0.3695               | 0.01                            | 0.5713              |
| Small Bowel Other                              | 0.8                                               | 0.8                                   | 0.8                                    | 0.7                                                | 0.00                             | 0.6610               | 0.00                            | 0.8719              |
| Small Bowel Resection                          | 8.3                                               | 8.3                                   | 6.9                                    | 6.6                                                | 0.07                             | <.0001               | 0.05                            | 0.0003              |
| Splenectomy                                    | 0.7                                               | 0.7                                   | 1.0                                    | 0.8                                                | -0.01                            | 0.2853               | -0.03                           | 0.0384              |
| Stomach Anti-Reflux                            | 0.3                                               | 0.3                                   | 0.7                                    | 1.0                                                | -0.09                            | <.0001               | -0.06                           | <.0001              |
| Stomach Gastric Bypass (non-bariatric)         | 0.3                                               | 0.3                                   | 0.5                                    | 0.5                                                | -0.03                            | 0.0090               | -0.03                           | 0.0742              |
| Stomach Other                                  | 0.3                                               | 0.3                                   | 0.4                                    | 0.3                                                | -0.01                            | 0.5090               | -0.01                           | 0.4492              |
| Stomach Partial Gastrectomy                    | 1.0                                               | 1.0                                   | 1.4                                    | 1.5                                                | -0.04                            | 0.0002               | -0.04                           | 0.0076              |
| Stomach Total Gastrectomy                      | --*                                               | --*                                   | 0.3                                    | 0.4                                                | -0.07                            | <.0001               | -0.04                           | 0.0005              |
| Thyroidectomy Partial                          | 0.3                                               | 0.3                                   | 0.6                                    | 0.6                                                | -0.06                            | <.0001               | -0.06                           | 0.0001              |
| Thyroidectomy Substernal                       | --*                                               | --*                                   | 0.1                                    | 0.1                                                | -0.01                            | 0.4359               | -0.02                           | 0.2099              |
| Thyroidectomy Total                            | 0.5                                               | 0.5                                   | 0.9                                    | 0.8                                                | -0.04                            | 0.0001               | -0.06                           | 0.0001              |
| Ulcer                                          | 1.4                                               | 1.4                                   | 1.2                                    | 1.0                                                | 0.04                             | 0.0004               | 0.02                            | 0.1478              |
| Emergent Admission                             | 52.7                                              | 52.7                                  | 40.5                                   | 39.7                                               | 0.26                             | <.0001               | 0.25                            | <.0001              |
| <b>Risk Factors &amp; Patient Demographics</b> |                                                   |                                       |                                        |                                                    |                                  |                      |                                 |                     |
| Age at Admission (years, mean)                 | 77.0                                              | 77.0                                  | 76.6                                   | 76.8                                               | 0.03                             | 0.0131               | 0.06                            | <.0001              |
| Age 65-69                                      | 21.6                                              | 21.6                                  | 23.0                                   | 22.3                                               | -0.02                            | 0.1161               | -0.04                           | 0.0135              |
| Age 70-74                                      | 23.6                                              | 23.6                                  | 24.6                                   | 23.7                                               | 0.00                             | 0.8503               | -0.02                           | 0.1008              |
| Age 75-79                                      | 20.4                                              | 20.4                                  | 20.9                                   | 21.1                                               | -0.02                            | 0.1448               | -0.01                           | 0.4512              |
| Age 80-84                                      | 17.9                                              | 17.9                                  | 16.9                                   | 17.4                                               | 0.01                             | 0.2200               | 0.03                            | 0.0724              |
| Age 85+                                        | 16.5                                              | 16.5                                  | 14.6                                   | 15.6                                               | 0.03                             | 0.0172               | 0.05                            | 0.0002              |
| Sex (% female)                                 | 56.5                                              | 56.5                                  | 57.1                                   | 57.2                                               | -0.01                            | 0.1946               | -0.01                           | 0.3747              |
| Transfer-in                                    | 3.5                                               | 3.5                                   | 3.1                                    | 2.9                                                | 0.04                             | 0.0007               | 0.03                            | 0.0882              |
| Past Admission in Last 6 Months                | 28.7                                              | 28.7                                  | 27.8                                   | 27.7                                               | 0.02                             | 0.0346               | 0.02                            | 0.1387              |
| Admission after 9/30/2010                      | 86.3                                              | 86.3                                  | 86.3                                   | 67.3                                               | 0.46                             | <.0001               | 0.00                            | 1.0000              |

| Covariate<br>(percent unless noted)          | All New<br>Surgeon<br>Patients<br>before<br>Match | Matched<br>New<br>Surgeon<br>Patients | Matched<br>Exp.<br>Surgeon<br>Patients | All Exp.<br>Surgeon<br>Patients<br>before<br>Match | Stand<br>Diff<br>before<br>Match | P<br>before<br>Match | Stand<br>Diff<br>after<br>Match | P<br>after<br>Match |
|----------------------------------------------|---------------------------------------------------|---------------------------------------|----------------------------------------|----------------------------------------------------|----------------------------------|----------------------|---------------------------------|---------------------|
| Admission in 2012 or 2013                    | 53.8                                              | 53.8                                  | 53.8                                   | 34.7                                               | 0.39                             | <.0001               | 0.00                            | 1.0000              |
| Probability of 30-day Death                  | 6.2                                               | 6.2                                   | 5.4                                    | 5.2                                                | 0.12                             | <.0001               | 0.09                            | <.0001              |
| Comorbidity Count (mean)                     | 4.3                                               | 4.3                                   | 4.2                                    | 4.2                                                | 0.04                             | 0.0002               | 0.02                            | 0.1306              |
| Same-Day Secondary Procedures                |                                                   |                                       |                                        |                                                    |                                  |                      |                                 |                     |
| Major Operative Therapeutic<br>Comorbidities | 43.5                                              | 43.5                                  | 42.8                                   | 41.4                                               | 0.04                             | 0.0001               | 0.01                            | 0.3302              |
| Congestive Heart Failure                     | 22.8                                              | 22.8                                  | 20.3                                   | 20.0                                               | 0.07                             | <.0001               | 0.06                            | <.0001              |
| Past Myocardial Infarction                   | 11.2                                              | 11.2                                  | 10.8                                   | 10.5                                               | 0.02                             | 0.0196               | 0.01                            | 0.3896              |
| Past Arrhythmia                              | 30.7                                              | 30.7                                  | 31.0                                   | 29.9                                               | 0.02                             | 0.1383               | -0.01                           | 0.6231              |
| Angina                                       | 4.4                                               | 4.4                                   | 4.1                                    | 4.5                                                | 0.00                             | 0.7182               | 0.02                            | 0.2932              |
| Valvular Disease                             | 23.5                                              | 23.5                                  | 21.7                                   | 22.1                                               | 0.03                             | 0.0011               | 0.04                            | 0.0024              |
| Unstable Angina                              | 2.3                                               | 2.3                                   | 2.5                                    | 2.5                                                | -0.01                            | 0.2117               | -0.02                           | 0.2272              |
| Hypertension                                 | 85.3                                              | 85.3                                  | 84.6                                   | 84.4                                               | 0.03                             | 0.0141               | 0.02                            | 0.1267              |
| Diabetes                                     | 35.4                                              | 35.4                                  | 35.2                                   | 34.5                                               | 0.02                             | 0.0559               | 0.01                            | 0.7329              |
| Renal Dysfunction                            | 28.2                                              | 28.2                                  | 24.6                                   | 22.9                                               | 0.12                             | <.0001               | 0.08                            | <.0001              |
| Renal Failure                                | 6.5                                               | 6.5                                   | 6.2                                    | 5.8                                                | 0.03                             | 0.0052               | 0.01                            | 0.4000              |
| Liver Disease                                | 16.3                                              | 16.3                                  | 16.4                                   | 16.3                                               | 0.00                             | 0.9769               | 0.00                            | 0.9236              |
| Cancer                                       | 43.7                                              | 43.7                                  | 49.3                                   | 50.0                                               | -0.13                            | <.0001               | -0.11                           | <.0001              |
| Specific Abdominal Cancer                    | 3.1                                               | 3.1                                   | 4.6                                    | 5.3                                                | -0.11                            | <.0001               | -0.07                           | <.0001              |
| Dementia                                     | 13.3                                              | 13.3                                  | 11.0                                   | 10.8                                               | 0.08                             | <.0001               | 0.07                            | <.0001              |
| Stroke                                       | 14.0                                              | 14.0                                  | 13.2                                   | 12.4                                               | 0.05                             | <.0001               | 0.03                            | 0.0718              |
| Seizure                                      | 2.1                                               | 2.1                                   | 2.2                                    | 1.9                                                | 0.02                             | 0.0767               | -0.01                           | 0.6962              |
| Paraplegia                                   | 2.7                                               | 2.7                                   | 2.5                                    | 2.3                                                | 0.03                             | 0.0128               | 0.01                            | 0.3462              |
| COPD                                         | 28.6                                              | 28.6                                  | 28.3                                   | 27.6                                               | 0.02                             | 0.0295               | 0.01                            | 0.6598              |
| Asthma                                       | 9.4                                               | 9.4                                   | 10.4                                   | 9.9                                                | -0.02                            | 0.1263               | -0.03                           | 0.0224              |
| Post-inflammatory Pulmonary Fibrosis         | 3.9                                               | 3.9                                   | 3.9                                    | 3.7                                                | 0.01                             | 0.2327               | 0.00                            | 0.9122              |
| Hypothyroidism                               | 23.3                                              | 23.3                                  | 23.2                                   | 23.4                                               | 0.00                             | 0.8596               | 0.00                            | 0.8535              |
| Thrombocytopenia                             | 3.1                                               | 3.1                                   | 3.3                                    | 3.2                                                | -0.01                            | 0.5041               | -0.01                           | 0.4920              |
| Collagen Vascular Disease                    | 6.1                                               | 6.1                                   | 6.8                                    | 6.3                                                | -0.01                            | 0.2906               | -0.03                           | 0.0324              |
| AIDS                                         | --*                                               | --*                                   | --*                                    | 0.1                                                | 0.00                             | 1.0000               | 0.01                            | 0.7905              |
| Chronic Peptic Ulcer                         | 0.3                                               | 0.3                                   | 0.2                                    | 0.3                                                | -0.01                            | 0.5748               | 0.01                            | 0.5826              |
| Coagulopathy                                 | 0.4                                               | 0.4                                   | 0.4                                    | 0.4                                                | 0.00                             | 0.8702               | 0.01                            | 0.4331              |
| Other Coagulopathy                           | 4.9                                               | 4.9                                   | 4.7                                    | 4.5                                                | 0.02                             | 0.0796               | 0.01                            | 0.6904              |
| Cushing's Disease                            | --*                                               | --*                                   | 0.1                                    | 0.1                                                | -0.01                            | 0.3436               | -0.02                           | 0.2860              |
| Graves' Disease                              | 0.4                                               | 0.4                                   | 0.5                                    | 0.4                                                | -0.01                            | 0.6195               | -0.02                           | 0.2397              |
| Hemoglobin Disorder                          | --*                                               | --*                                   | --*                                    | 0.0                                                | -0.01                            | 0.5015               | 0.00                            | 1.0000              |

Cells marked "--\*" are masked to comply with CMS cell size suppression rules.

P-values calculated using group tests, with Fisher's exact test used for binary and Wilcoxon rank sum used for continuous variables.

**eTable 7b. Orthopedic Surgery Year Match**

| Covariate<br>(percent unless noted)          | All New<br>Surgeon<br>Patients<br>before<br>Match | Matched<br>New<br>Surgeon<br>Patients | Matched<br>Exp.<br>Surgeon<br>Patients | All Exp.<br>Surgeon<br>Patients<br>before<br>Match | Stand<br>Diff<br>before<br>Match | P<br>before<br>Match | Stand<br>Diff<br>after<br>Match | P<br>after<br>Match |
|----------------------------------------------|---------------------------------------------------|---------------------------------------|----------------------------------------|----------------------------------------------------|----------------------------------|----------------------|---------------------------------|---------------------|
| Number of Surgeons                           |                                                   |                                       |                                        |                                                    |                                  |                      |                                 |                     |
| Number of Patients                           | 8,260                                             | 8,260                                 | 8,260                                  | 131,045                                            |                                  |                      |                                 |                     |
| Year of admission (mean)                     | 2011.6                                            | 2011.6                                | 2011.6                                 | 2011.0                                             | 0.48                             | <.0001               | 0.00                            | 1.0000              |
| <b>Unmatched Covariates</b>                  |                                                   |                                       |                                        |                                                    |                                  |                      |                                 |                     |
| Principal Procedure Categories               |                                                   |                                       |                                        |                                                    |                                  |                      |                                 |                     |
| Hip Repair                                   | 29.7                                              | 29.7                                  | 17.1                                   | 10.4                                               | 0.50                             | <.0001               | 0.32                            | <.0001              |
| Hip Replacement                              | 50.1                                              | 50.1                                  | 37.4                                   | 35.5                                               | 0.30                             | <.0001               | 0.26                            | <.0001              |
| Hip Replacement Revision                     | 2.0                                               | 2.0                                   | 3.0                                    | 3.5                                                | -0.09                            | <.0001               | -0.06                           | 0.0001              |
| Knee Replacement                             | 16.8                                              | 16.8                                  | 39.8                                   | 47.3                                               | -0.69                            | <.0001               | -0.52                           | <.0001              |
| Knee Replacement Revision                    | 1.5                                               | 1.5                                   | 2.8                                    | 3.4                                                | -0.13                            | <.0001               | -0.09                           | <.0001              |
| Emergent Admission                           | 55.3                                              | 55.3                                  | 27.8                                   | 18.2                                               | 0.83                             | <.0001               | 0.62                            | <.0001              |
| Risk Factors & Patient Demographics          |                                                   |                                       |                                        |                                                    |                                  |                      |                                 |                     |
| Age at Admission (years, mean)               | 81.3                                              | 81.3                                  | 78.0                                   | 77.1                                               | 0.53                             | <.0001               | 0.41                            | <.0001              |
| Age 65-69                                    | 11.9                                              | 11.9                                  | 19.8                                   | 21.3                                               | -0.25                            | <.0001               | -0.21                           | <.0001              |
| Age 70-74                                    | 15.0                                              | 15.0                                  | 21.8                                   | 24.0                                               | -0.23                            | <.0001               | -0.17                           | <.0001              |
| Age 75-79                                    | 16.6                                              | 16.6                                  | 19.5                                   | 21.3                                               | -0.12                            | <.0001               | -0.08                           | <.0001              |
| Age 80-84                                    | 19.7                                              | 19.7                                  | 17.2                                   | 16.8                                               | 0.08                             | <.0001               | 0.07                            | <.0001              |
| Age 85+                                      | 36.9                                              | 36.9                                  | 21.7                                   | 16.6                                               | 0.47                             | <.0001               | 0.35                            | <.0001              |
| Sex (% female)                               | 70.9                                              | 70.9                                  | 67.5                                   | 65.9                                               | 0.11                             | <.0001               | 0.07                            | <.0001              |
| Transfer-in                                  | 1.3                                               | 1.3                                   | 0.7                                    | 0.7                                                | 0.07                             | <.0001               | 0.06                            | 0.0001              |
| Past Admission in Last 6 Months              |                                                   |                                       |                                        |                                                    |                                  |                      |                                 |                     |
| Admission after 9/30/2010                    | 88.7                                              | 88.7                                  | 88.7                                   | 69.2                                               | 0.49                             | <.0001               | 0.00                            | 1.0000              |
| Admission in 2012 or 2013                    | 56.3                                              | 56.3                                  | 56.3                                   | 37.7                                               | 0.38                             | <.0001               | 0.00                            | 1.0000              |
| Probability of 30-day Death                  |                                                   |                                       |                                        |                                                    |                                  |                      |                                 |                     |
| Comorbidity Count (mean)                     | 4.0                                               | 4.0                                   | 3.5                                    | 3.2                                                | 0.54                             | <.0001               | 0.40                            | <.0001              |
| Same-Day Secondary Procedures                |                                                   |                                       |                                        |                                                    |                                  |                      |                                 |                     |
| Major Operative Therapeutic<br>Comorbidities | 6.6                                               | 6.6                                   | 6.9                                    | 7.7                                                | -0.04                            | 0.0002               | -0.01                           | 0.3518              |
| Congestive Heart Failure                     |                                                   |                                       |                                        |                                                    |                                  |                      |                                 |                     |
| Past Myocardial Infarction                   | 21.5                                              | 21.5                                  | 15.8                                   | 12.5                                               | 0.24                             | <.0001               | 0.15                            | <.0001              |
| Past Arrhythmia                              | 9.4                                               | 9.4                                   | 7.9                                    | 7.1                                                | 0.08                             | <.0001               | 0.06                            | 0.0004              |
| Angina                                       | 30.3                                              | 30.3                                  | 27.0                                   | 25.3                                               | 0.11                             | <.0001               | 0.08                            | <.0001              |
| Valvular Disease                             | 3.4                                               | 3.4                                   | 3.2                                    | 2.9                                                | 0.03                             | 0.0159               | 0.01                            | 0.5723              |
| Unstable Angina                              | 24.3                                              | 24.3                                  | 20.1                                   | 18.3                                               | 0.15                             | <.0001               | 0.10                            | <.0001              |
| Hypertension                                 | 1.3                                               | 1.3                                   | 1.2                                    | 1.0                                                | 0.03                             | 0.0067               | 0.01                            | 0.6270              |
| Diabetes                                     | 86.8                                              | 86.8                                  | 86.0                                   | 84.9                                               | 0.06                             | <.0001               | 0.02                            | 0.1287              |
| Renal Dysfunction                            | 29.0                                              | 29.0                                  | 28.5                                   | 27.7                                               | 0.03                             | 0.0121               | 0.01                            | 0.5360              |
| Renal Failure                                | 21.6                                              | 21.6                                  | 16.1                                   | 12.8                                               | 0.23                             | <.0001               | 0.15                            | <.0001              |
| Liver Disease                                | 4.4                                               | 4.4                                   | 3.0                                    | 2.6                                                | 0.10                             | <.0001               | 0.08                            | <.0001              |
| Cancer                                       | 3.9                                               | 3.9                                   | 3.1                                    | 3.1                                                | 0.05                             | <.0001               | 0.04                            | 0.0051              |
| Specific Abdominal Cancer                    | 26.7                                              | 26.7                                  | 25.9                                   | 25.8                                               | 0.02                             | 0.0782               | 0.02                            | 0.2507              |
| Dementia                                     | 0.5                                               | 0.5                                   | 0.2                                    | 0.2                                                | 0.05                             | <.0001               | 0.05                            | 0.0036              |
| Stroke                                       | 30.8                                              | 30.8                                  | 17.1                                   | 12.2                                               | 0.47                             | <.0001               | 0.34                            | <.0001              |
| Seizure                                      | 18.1                                              | 18.1                                  | 12.9                                   | 10.3                                               | 0.22                             | <.0001               | 0.15                            | <.0001              |
| Paraplegia                                   | 2.6                                               | 2.6                                   | 1.8                                    | 1.5                                                | 0.08                             | <.0001               | 0.05                            | 0.0010              |
| COPD                                         | 3.1                                               | 3.1                                   | 1.9                                    | 1.3                                                | 0.12                             | <.0001               | 0.08                            | <.0001              |
| Asthma                                       | 25.8                                              | 25.8                                  | 20.9                                   | 18.5                                               | 0.18                             | <.0001               | 0.12                            | <.0001              |
| Post-inflammatory Pulmonary Fibrosis         | 8.8                                               | 8.8                                   | 9.9                                    | 9.8                                                | -0.03                            | 0.0028               | -0.04                           | 0.0172              |
| Hypothyroidism                               | 3.8                                               | 3.8                                   | 3.0                                    | 2.4                                                | 0.08                             | <.0001               | 0.05                            | 0.0030              |
| Thrombocytopenia                             | 27.5                                              | 27.5                                  | 25.9                                   | 25.8                                               | 0.04                             | 0.0008               | 0.03                            | 0.0267              |
| Collagen Vascular Disease                    | 2.7                                               | 2.7                                   | 1.9                                    | 1.7                                                | 0.07                             | <.0001               | 0.06                            | 0.0004              |
| AIDS                                         | 7.7                                               | 7.7                                   | 8.0                                    | 8.5                                                | -0.03                            | 0.0120               | -0.01                           | 0.4873              |
| Chronic Peptic Ulcer                         | --*                                               | --*                                   | --*                                    | 0.0                                                | 0.02                             | 0.0156               | 0.01                            | 0.8035              |
| Coagulopathy                                 | --*                                               | --*                                   | --*                                    | 0.1                                                | 0.01                             | 0.5189               | 0.00                            | 1.0000              |
| Other Coagulopathy                           | 0.3                                               | 0.3                                   | 0.4                                    | 0.5                                                | -0.03                            | 0.0287               | -0.02                           | 0.3573              |
| Cushing's Disease                            | 4.0                                               | 4.0                                   | 3.3                                    | 3.6                                                | 0.02                             | 0.0677               | 0.03                            | 0.0248              |
|                                              | --*                                               | --*                                   | --*                                    | 0.1                                                | 0.00                             | 1.0000               | -0.02                           | 0.3436              |

| <b>Covariate<br/>(percent unless noted)</b> | <b>All New<br/>Surgeon<br/>Patients<br/>before<br/>Match</b> | <b>Matched<br/>New<br/>Surgeon<br/>Patients</b> | <b>Matched<br/>Exp.<br/>Surgeon<br/>Patients</b> | <b>All Exp.<br/>Surgeon<br/>Patients<br/>before<br/>Match</b> | <b>Stand<br/>Diff<br/>before<br/>Match</b> | <b>P<br/>before<br/>Match</b> | <b>Stand<br/>Diff<br/>after<br/>Match</b> | <b>P<br/>after<br/>Match</b> |
|---------------------------------------------|--------------------------------------------------------------|-------------------------------------------------|--------------------------------------------------|---------------------------------------------------------------|--------------------------------------------|-------------------------------|-------------------------------------------|------------------------------|
| Graves' Disease                             | 0.3                                                          | 0.3                                             | 0.2                                              | 0.3                                                           | 0.01                                       | 0.6043                        | 0.02                                      | 0.1258                       |
| Hemoglobin Disorder                         | --*                                                          | --*                                             | --*                                              | 0.0                                                           | 0.01                                       | 0.3563                        | -0.01                                     | 1.0000                       |

Cells marked "--\*" are masked to comply with CMS cell size suppression rules.

P-values calculated using group tests, with Fisher's exact test used for binary and Wilcoxon rank sum used for continuous variables.



**eTable 8. Complete Matching Tables for Operation Match** Displays the covariate balance when new and experienced surgeon patients were paired only on year of admission and procedure. Covariates not included in the matching algorithm are displayed below the horizontal line.

| Covariate<br>(percent unless noted)    | All New<br>Surgeon<br>Patients<br>before<br>Match | Matched<br>New<br>Surgeon<br>Patients | Matched<br>Exp.<br>Surgeon<br>Patients | All Exp.<br>Surgeon<br>Patients<br>before<br>Match | Stand<br>Diff<br>before<br>Match | P<br>before<br>Match | Stand<br>Diff<br>after<br>Match | P<br>after<br>Match |
|----------------------------------------|---------------------------------------------------|---------------------------------------|----------------------------------------|----------------------------------------------------|----------------------------------|----------------------|---------------------------------|---------------------|
| Number of Surgeons                     |                                                   |                                       |                                        |                                                    |                                  |                      |                                 |                     |
| Number of Patients                     | 18,200                                            | 18,200                                | 18,200                                 | 203,113                                            |                                  |                      |                                 |                     |
| Year of admission (mean)               | 2011.5                                            | 2011.5                                | 2011.5                                 | 2011.0                                             | 0.47                             | <.0001               | 0.00                            | 0.8588              |
| Principal Procedure Categories         |                                                   |                                       |                                        |                                                    |                                  |                      |                                 |                     |
| General Surgery                        |                                                   |                                       |                                        |                                                    |                                  |                      |                                 |                     |
| Adrenalectomy                          | 0.3                                               | 0.3                                   | 0.3                                    | 0.3                                                | 0.00                             | 0.8358               | 0.00                            | 1.0000              |
| Appendectomy                           | 5.3                                               | 5.3                                   | 5.3                                    | 3.9                                                | 0.07                             | <.0001               | 0.00                            | 1.0000              |
| Bariatric                              | 0.5                                               | 0.5                                   | 0.5                                    | 0.6                                                | -0.01                            | 0.2398               | 0.00                            | 1.0000              |
| Biliary common duct                    | --*                                               | --*                                   | --*                                    | 0.1                                                | -0.01                            | 0.6182               | 0.00                            | 1.0000              |
| Biliary other                          | --*                                               | --*                                   | --*                                    | 0.4                                                | -0.06                            | <.0001               | 0.00                            | 1.0000              |
| Cholecystectomy                        | 29.8                                              | 29.8                                  | 29.8                                   | 25.4                                               | 0.10                             | <.0001               | 0.00                            | 1.0000              |
| Colectomy Partial – Lap                | 9.1                                               | 9.1                                   | 9.1                                    | 10.0                                               | -0.03                            | 0.0044               | 0.00                            | 1.0000              |
| Colectomy Partial – Open               | 18.0                                              | 18.0                                  | 18.0                                   | 17.7                                               | 0.01                             | 0.4414               | 0.00                            | 1.0000              |
| Colectomy Total – Lap                  | 0.3                                               | 0.3                                   | 0.3                                    | 0.2                                                | 0.02                             | 0.0570               | 0.00                            | 1.0000              |
| Colectomy Total – Open                 | 1.2                                               | 1.2                                   | 1.2                                    | 1.0                                                | 0.02                             | 0.1033               | 0.00                            | 1.0000              |
| Esophagectomy                          | --*                                               | --*                                   | --*                                    | 0.2                                                | -0.03                            | 0.0157               | 0.00                            | 1.0000              |
| Esophagomyotomy                        | --*                                               | --*                                   | --*                                    | 0.2                                                | -0.02                            | 0.0563               | 0.00                            | 1.0000              |
| Hernia Abdominal – Lap                 | 1.5                                               | 1.5                                   | 1.5                                    | 1.3                                                | 0.01                             | 0.3790               | 0.00                            | 1.0000              |
| Hernia Abdominal – Open                | 3.3                                               | 3.3                                   | 3.3                                    | 5.3                                                | -0.10                            | <.0001               | 0.00                            | 1.0000              |
| Hernia Groin – Lap                     | 0.4                                               | 0.4                                   | 0.4                                    | 0.5                                                | -0.01                            | 0.2948               | 0.00                            | 1.0000              |
| Hernia Groin – Open                    | 3.6                                               | 3.6                                   | 3.6                                    | 3.2                                                | 0.02                             | 0.0608               | 0.00                            | 1.0000              |
| Large Bowel Other                      | 0.8                                               | 0.8                                   | 0.8                                    | 0.8                                                | 0.00                             | 1.0000               | 0.00                            | 1.0000              |
| Liver Other                            | --*                                               | --*                                   | --*                                    | 0.1                                                | -0.03                            | 0.0188               | 0.00                            | 1.0000              |
| Liver Partial Hepatectomy              | 0.3                                               | 0.3                                   | 0.3                                    | 0.7                                                | -0.05                            | <.0001               | 0.00                            | 1.0000              |
| Lysis of Adhesions                     | 5.6                                               | 5.6                                   | 5.6                                    | 5.1                                                | 0.02                             | 0.0274               | 0.00                            | 1.0000              |
| Mastectomy                             | 1.4                                               | 1.4                                   | 1.4                                    | 2.6                                                | -0.09                            | <.0001               | 0.00                            | 1.0000              |
| Pancreatectomy                         | 0.7                                               | 0.7                                   | 0.7                                    | 1.8                                                | -0.09                            | <.0001               | 0.00                            | 1.0000              |
| Parathyroidectomy                      | 0.3                                               | 0.3                                   | 0.3                                    | 0.8                                                | -0.06                            | <.0001               | 0.00                            | 1.0000              |
| PD Access Procedure                    | 0.3                                               | 0.3                                   | 0.3                                    | 0.3                                                | 0.01                             | 0.4042               | 0.00                            | 1.0000              |
| Proctectomy                            | 2.9                                               | 2.9                                   | 2.9                                    | 3.1                                                | -0.01                            | 0.2904               | 0.00                            | 1.0000              |
| Proctopexy                             | 0.1                                               | 0.1                                   | 0.1                                    | 0.1                                                | 0.00                             | 0.8702               | 0.00                            | 1.0000              |
| Pyloroplasty                           | 0.2                                               | 0.2                                   | 0.2                                    | 0.1                                                | 0.01                             | 0.3695               | 0.00                            | 1.0000              |
| Small Bowel Other                      | 0.8                                               | 0.8                                   | 0.8                                    | 0.7                                                | 0.00                             | 0.6610               | 0.00                            | 1.0000              |
| Small Bowel Resection                  | 8.3                                               | 8.3                                   | 8.3                                    | 6.6                                                | 0.07                             | <.0001               | 0.00                            | 1.0000              |
| Splenectomy                            | 0.7                                               | 0.7                                   | 0.7                                    | 0.8                                                | -0.01                            | 0.2853               | 0.00                            | 1.0000              |
| Stomach Anti-Reflux                    | 0.3                                               | 0.3                                   | 0.3                                    | 1.0                                                | -0.09                            | <.0001               | 0.00                            | 1.0000              |
| Stomach Gastric Bypass (non-bariatric) | 0.3                                               | 0.3                                   | 0.3                                    | 0.5                                                | -0.03                            | 0.0090               | 0.00                            | 1.0000              |
| Stomach Other                          | 0.3                                               | 0.3                                   | 0.3                                    | 0.3                                                | -0.01                            | 0.5090               | 0.00                            | 1.0000              |
| Stomach Partial Gastrectomy            | 1.0                                               | 1.0                                   | 1.0                                    | 1.5                                                | -0.04                            | 0.0002               | 0.00                            | 1.0000              |
| Stomach Total Gastrectomy              | --*                                               | --*                                   | --*                                    | 0.4                                                | -0.07                            | <.0001               | 0.00                            | 1.0000              |
| Thyroidectomy Partial                  | 0.3                                               | 0.3                                   | 0.3                                    | 0.6                                                | -0.06                            | <.0001               | 0.00                            | 1.0000              |
| Thyroidectomy Substernal               | --*                                               | --*                                   | --*                                    | 0.1                                                | -0.01                            | 0.4359               | 0.00                            | 1.0000              |
| Thyroidectomy Total                    | 0.5                                               | 0.5                                   | 0.5                                    | 0.8                                                | -0.04                            | 0.0001               | 0.00                            | 1.0000              |
| Ulcer                                  | 1.4                                               | 1.4                                   | 1.4                                    | 1.0                                                | 0.04                             | 0.0004               | 0.00                            | 1.0000              |
| Orthopedic Surgery                     |                                                   |                                       |                                        |                                                    |                                  |                      |                                 |                     |
| Hip Repair                             | 29.7                                              | 29.7                                  | 29.7                                   | 10.4                                               | 0.50                             | <.0001               | 0.00                            | 1.0000              |
| Hip Replacement                        | 50.1                                              | 50.1                                  | 50.1                                   | 35.5                                               | 0.30                             | <.0001               | 0.00                            | 1.0000              |
| Hip Replacement Revision               | 2.0                                               | 2.0                                   | 2.0                                    | 3.5                                                | -0.09                            | <.0001               | 0.00                            | 1.0000              |
| Knee Replacement                       | 16.8                                              | 16.8                                  | 16.8                                   | 47.3                                               | -0.69                            | <.0001               | 0.00                            | 1.0000              |
| Knee Replacement Revision              | 1.5                                               | 1.5                                   | 1.5                                    | 3.4                                                | -0.13                            | <.0001               | 0.00                            | 1.0000              |
| <b>Unmatched Covariates</b>            |                                                   |                                       |                                        |                                                    |                                  |                      |                                 |                     |
| Emergent Admission                     | 53.9                                              | 53.9                                  | 43.0                                   | 25.8                                               | 0.60                             | <.0001               | 0.23                            | <.0001              |
| Risk Factors & Patient Demographics    |                                                   |                                       |                                        |                                                    |                                  |                      |                                 |                     |

| Covariate<br>(percent unless noted)  | All New<br>Surgeon<br>Patients<br>before<br>Match | Matched<br>New<br>Surgeon<br>Patients | Matched<br>Exp.<br>Surgeon<br>Patients | All Exp.<br>Surgeon<br>Patients<br>before<br>Match | Stand<br>Diff<br>before<br>Match | P<br>before<br>Match | Stand<br>Diff<br>after<br>Match | P<br>after<br>Match |
|--------------------------------------|---------------------------------------------------|---------------------------------------|----------------------------------------|----------------------------------------------------|----------------------------------|----------------------|---------------------------------|---------------------|
| Age at Admission (years, mean)       | 79.0                                              | 79.0                                  | 78.2                                   | 77.0                                               | 0.25                             | <.0001               | 0.09                            | <.0001              |
| Age 65-69                            | 17.2                                              | 17.2                                  | 19.0                                   | 21.6                                               | -0.11                            | <.0001               | -0.05                           | <.0001              |
| Age 70-74                            | 19.7                                              | 19.7                                  | 21.2                                   | 23.9                                               | -0.10                            | <.0001               | -0.04                           | 0.0005              |
| Age 75-79                            | 18.7                                              | 18.7                                  | 19.5                                   | 21.2                                               | -0.06                            | <.0001               | -0.02                           | 0.0484              |
| Age 80-84                            | 18.7                                              | 18.7                                  | 18.5                                   | 17.0                                               | 0.04                             | <.0001               | 0.01                            | 0.6374              |
| Age 85+                              | 25.8                                              | 25.8                                  | 21.9                                   | 16.3                                               | 0.24                             | <.0001               | 0.10                            | <.0001              |
| Sex (% female)                       | 63.0                                              | 63.0                                  | 61.9                                   | 62.8                                               | 0.00                             | 0.5862               | 0.02                            | 0.0296              |
| Transfer-in                          | 2.5                                               | 2.5                                   | 2.2                                    | 1.5                                                | 0.08                             | <.0001               | 0.02                            | 0.0499              |
| Past Admission in Last 6 Months      | 25.6                                              | 25.6                                  | 24.1                                   | 19.3                                               | 0.15                             | <.0001               | 0.04                            | 0.0005              |
| Admission after 9/30/2010            | 87.4                                              | 87.4                                  | 87.4                                   | 68.5                                               | 0.47                             | <.0001               | 0.00                            | 1.0000              |
| Admission in 2012 or 2013            | 54.9                                              | 54.9                                  | 54.9                                   | 36.6                                               | 0.37                             | <.0001               | 0.00                            | 0.9078              |
| Probability of 30-day Death          | 5.6                                               | 5.6                                   | 4.7                                    | 3.0                                                | 0.35                             | <.0001               | 0.12                            | <.0001              |
| Comorbidity Count (mean)             | 4.1                                               | 4.1                                   | 4.0                                    | 3.5                                                | 0.26                             | <.0001               | 0.07                            | <.0001              |
| Same-Day Secondary Procedures        |                                                   |                                       |                                        |                                                    |                                  |                      |                                 |                     |
| Major Operative Therapeutic          | 26.7                                              | 26.7                                  | 25.8                                   | 19.7                                               | 0.17                             | <.0001               | 0.02                            | 0.0404              |
| Comorbidities                        |                                                   |                                       |                                        |                                                    |                                  |                      |                                 |                     |
| Congestive Heart Failure             | 22.2                                              | 22.2                                  | 19.9                                   | 15.2                                               | 0.18                             | <.0001               | 0.06                            | <.0001              |
| Past Myocardial Infarction           | 10.4                                              | 10.4                                  | 10.0                                   | 8.3                                                | 0.07                             | <.0001               | 0.01                            | 0.2060              |
| Past Arrhythmia                      | 30.5                                              | 30.5                                  | 30.0                                   | 26.9                                               | 0.08                             | <.0001               | 0.01                            | 0.3099              |
| Angina                               | 4.0                                               | 4.0                                   | 3.6                                    | 3.5                                                | 0.02                             | 0.0012               | 0.02                            | 0.0838              |
| Valvular Disease                     | 23.9                                              | 23.9                                  | 22.4                                   | 19.6                                               | 0.10                             | <.0001               | 0.04                            | 0.0005              |
| Unstable Angina                      | 1.8                                               | 1.8                                   | 2.1                                    | 1.5                                                | 0.02                             | 0.0015               | -0.02                           | 0.1382              |
| Hypertension                         | 86.0                                              | 86.0                                  | 85.1                                   | 84.7                                               | 0.04                             | <.0001               | 0.03                            | 0.0171              |
| Diabetes                             | 32.5                                              | 32.5                                  | 32.0                                   | 30.1                                               | 0.05                             | <.0001               | 0.01                            | 0.2573              |
| Renal Dysfunction                    | 25.2                                              | 25.2                                  | 21.5                                   | 16.4                                               | 0.22                             | <.0001               | 0.09                            | <.0001              |
| Renal Failure                        | 5.6                                               | 5.6                                   | 5.1                                    | 3.7                                                | 0.09                             | <.0001               | 0.03                            | 0.0249              |
| Liver Disease                        | 10.7                                              | 10.7                                  | 10.7                                   | 7.8                                                | 0.10                             | <.0001               | 0.00                            | 0.9325              |
| Cancer                               | 36.0                                              | 36.0                                  | 37.6                                   | 34.4                                               | 0.03                             | <.0001               | -0.03                           | 0.0023              |
| Specific Abdominal Cancer            | 1.9                                               | 1.9                                   | 2.0                                    | 2.0                                                | -0.01                            | 0.4093               | -0.01                           | 0.5228              |
| Dementia                             | 21.2                                              | 21.2                                  | 16.7                                   | 11.7                                               | 0.26                             | <.0001               | 0.12                            | <.0001              |
| Stroke                               | 15.9                                              | 15.9                                  | 14.1                                   | 11.0                                               | 0.14                             | <.0001               | 0.05                            | <.0001              |
| Seizure                              | 2.3                                               | 2.3                                   | 2.0                                    | 1.6                                                | 0.05                             | <.0001               | 0.03                            | 0.0153              |
| Paraplegia                           | 2.9                                               | 2.9                                   | 2.5                                    | 1.7                                                | 0.08                             | <.0001               | 0.02                            | 0.0375              |
| COPD                                 | 27.3                                              | 27.3                                  | 26.4                                   | 21.7                                               | 0.13                             | <.0001               | 0.02                            | 0.0396              |
| Asthma                               | 9.1                                               | 9.1                                   | 9.9                                    | 9.8                                                | -0.02                            | 0.0021               | -0.03                           | 0.0117              |
| Post-inflammatory Pulmonary Fibrosis | 3.9                                               | 3.9                                   | 3.6                                    | 2.8                                                | 0.06                             | <.0001               | 0.01                            | 0.2133              |
| Hypothyroidism                       | 25.2                                              | 25.2                                  | 25.2                                   | 25.0                                               | 0.01                             | 0.4475               | 0.00                            | 0.9519              |
| Thrombocytopenia                     | 2.9                                               | 2.9                                   | 2.9                                    | 2.3                                                | 0.04                             | <.0001               | 0.00                            | 0.9503              |
| Collagen Vascular Disease            | 6.8                                               | 6.8                                   | 7.3                                    | 7.7                                                | -0.04                            | <.0001               | -0.02                           | 0.0544              |
| AIDS                                 | 0.1                                               | 0.1                                   | 0.1                                    | 0.1                                                | 0.01                             | 0.0569               | 0.01                            | 0.7200              |
| Chronic Peptic Ulcer                 | 0.2                                               | 0.2                                   | 0.2                                    | 0.2                                                | 0.01                             | 0.2543               | 0.00                            | 0.9049              |
| Coagulopathy                         | 0.4                                               | 0.4                                   | 0.5                                    | 0.5                                                | -0.01                            | 0.1639               | -0.02                           | 0.1116              |
| Other Coagulopathy                   | 4.5                                               | 4.5                                   | 4.2                                    | 3.9                                                | 0.03                             | 0.0002               | 0.01                            | 0.2064              |
| Cushing's Disease                    | 0.1                                               | 0.1                                   | 0.1                                    | 0.1                                                | 0.00                             | 0.7697               | -0.01                           | 0.4419              |
| Graves' Disease                      | 0.4                                               | 0.4                                   | 0.3                                    | 0.3                                                | 0.00                             | 0.7414               | 0.01                            | 0.4665              |
| Hemoglobin Disorder                  | --*                                               | --*                                   | --*                                    | 0.0                                                | 0.00                             | 1.0000               | -0.01                           | 0.5078              |

Cells marked "--\*" are masked to comply with CMS cell size suppression rules.

P-values calculated using group tests, with Fisher's exact test used for binary and Wilcoxon rank sum used for continuous variables.

**eTable 8a. General Surgery Operation Match**

| Covariate<br>(percent unless noted)    | All New<br>Surgeon<br>Patients<br>before<br>Match | Matched<br>New<br>Surgeon<br>Patients | Matched<br>Exp.<br>Surgeon<br>Patients | All Exp.<br>Surgeon<br>Patients<br>before<br>Match | Stand<br>Diff<br>before<br>Match | P<br>before<br>Match | Stand<br>Diff<br>after<br>Match | P<br>after<br>Match |
|----------------------------------------|---------------------------------------------------|---------------------------------------|----------------------------------------|----------------------------------------------------|----------------------------------|----------------------|---------------------------------|---------------------|
| Number of Surgeons                     |                                                   |                                       |                                        |                                                    |                                  |                      |                                 |                     |
| Number of Patients                     | 9,940                                             | 9,940                                 | 9,940                                  | 72,068                                             |                                  |                      |                                 |                     |
| Year of admission (mean)               | 2011.5                                            | 2011.5                                | 2011.5                                 | 2010.9                                             | 0.48                             | <.0001               | 0.00                            | 0.8102              |
| Principal Procedure Categories         |                                                   |                                       |                                        |                                                    |                                  |                      |                                 |                     |
| Adrenalectomy                          | 0.3                                               | 0.3                                   | 0.3                                    | 0.3                                                | 0.00                             | 0.8358               | 0.00                            | 1.0000              |
| Appendectomy                           | 5.3                                               | 5.3                                   | 5.3                                    | 3.9                                                | 0.07                             | <.0001               | 0.00                            | 1.0000              |
| Bariatric                              | 0.5                                               | 0.5                                   | 0.5                                    | 0.6                                                | -0.01                            | 0.2398               | 0.00                            | 1.0000              |
| Biliary common duct                    | --*                                               | --*                                   | --*                                    | 0.1                                                | -0.01                            | 0.6182               | 0.00                            | 1.0000              |
| Biliary other                          | --*                                               | --*                                   | --*                                    | 0.4                                                | -0.06                            | <.0001               | 0.00                            | 1.0000              |
| Cholecystectomy                        | 29.8                                              | 29.8                                  | 29.8                                   | 25.4                                               | 0.10                             | <.0001               | 0.00                            | 1.0000              |
| Colectomy Partial – Lap                | 9.1                                               | 9.1                                   | 9.1                                    | 10.0                                               | -0.03                            | 0.0044               | 0.00                            | 1.0000              |
| Colectomy Partial – Open               | 18.0                                              | 18.0                                  | 18.0                                   | 17.7                                               | 0.01                             | 0.4414               | 0.00                            | 1.0000              |
| Colectomy Total – Lap                  | 0.3                                               | 0.3                                   | 0.3                                    | 0.2                                                | 0.02                             | 0.0570               | 0.00                            | 1.0000              |
| Colectomy Total – Open                 | 1.2                                               | 1.2                                   | 1.2                                    | 1.0                                                | 0.02                             | 0.1033               | 0.00                            | 1.0000              |
| Esophagectomy                          | --*                                               | --*                                   | --*                                    | 0.2                                                | -0.03                            | 0.0157               | 0.00                            | 1.0000              |
| Esophagomyotomy                        | --*                                               | --*                                   | --*                                    | 0.2                                                | -0.02                            | 0.0563               | 0.00                            | 1.0000              |
| Hernia Abdominal – Lap                 | 1.5                                               | 1.5                                   | 1.5                                    | 1.3                                                | 0.01                             | 0.3790               | 0.00                            | 1.0000              |
| Hernia Abdominal – Open                | 3.3                                               | 3.3                                   | 3.3                                    | 5.3                                                | -0.10                            | <.0001               | 0.00                            | 1.0000              |
| Hernia Groin – Lap                     | 0.4                                               | 0.4                                   | 0.4                                    | 0.5                                                | -0.01                            | 0.2948               | 0.00                            | 1.0000              |
| Hernia Groin – Open                    | 3.6                                               | 3.6                                   | 3.6                                    | 3.2                                                | 0.02                             | 0.0608               | 0.00                            | 1.0000              |
| Large Bowel Other                      | 0.8                                               | 0.8                                   | 0.8                                    | 0.8                                                | 0.00                             | 1.0000               | 0.00                            | 1.0000              |
| Liver Other                            | --*                                               | --*                                   | --*                                    | 0.1                                                | -0.03                            | 0.0188               | 0.00                            | 1.0000              |
| Liver Partial Hepatectomy              | 0.3                                               | 0.3                                   | 0.3                                    | 0.7                                                | -0.05                            | <.0001               | 0.00                            | 1.0000              |
| Lysis of Adhesions                     | 5.6                                               | 5.6                                   | 5.6                                    | 5.1                                                | 0.02                             | 0.0274               | 0.00                            | 1.0000              |
| Mastectomy                             | 1.4                                               | 1.4                                   | 1.4                                    | 2.6                                                | -0.09                            | <.0001               | 0.00                            | 1.0000              |
| Pancreatectomy                         | 0.7                                               | 0.7                                   | 0.7                                    | 1.8                                                | -0.09                            | <.0001               | 0.00                            | 1.0000              |
| Parathyroidectomy                      | 0.3                                               | 0.3                                   | 0.3                                    | 0.8                                                | -0.06                            | <.0001               | 0.00                            | 1.0000              |
| PD Access Procedure                    | 0.3                                               | 0.3                                   | 0.3                                    | 0.3                                                | 0.01                             | 0.4042               | 0.00                            | 1.0000              |
| Proctectomy                            | 2.9                                               | 2.9                                   | 2.9                                    | 3.1                                                | -0.01                            | 0.2904               | 0.00                            | 1.0000              |
| Proctopexy                             | 0.1                                               | 0.1                                   | 0.1                                    | 0.1                                                | 0.00                             | 0.8702               | 0.00                            | 1.0000              |
| Pyloroplasty                           | 0.2                                               | 0.2                                   | 0.2                                    | 0.1                                                | 0.01                             | 0.3695               | 0.00                            | 1.0000              |
| Small Bowel Other                      | 0.8                                               | 0.8                                   | 0.8                                    | 0.7                                                | 0.00                             | 0.6610               | 0.00                            | 1.0000              |
| Small Bowel Resection                  | 8.3                                               | 8.3                                   | 8.3                                    | 6.6                                                | 0.07                             | <.0001               | 0.00                            | 1.0000              |
| Splenectomy                            | 0.7                                               | 0.7                                   | 0.7                                    | 0.8                                                | -0.01                            | 0.2853               | 0.00                            | 1.0000              |
| Stomach Anti-Reflux                    | 0.3                                               | 0.3                                   | 0.3                                    | 1.0                                                | -0.09                            | <.0001               | 0.00                            | 1.0000              |
| Stomach Gastric Bypass (non-bariatric) | 0.3                                               | 0.3                                   | 0.3                                    | 0.5                                                | -0.03                            | 0.0090               | 0.00                            | 1.0000              |
| Stomach Other                          | 0.3                                               | 0.3                                   | 0.3                                    | 0.3                                                | -0.01                            | 0.5090               | 0.00                            | 1.0000              |
| Stomach Partial Gastrectomy            | 1.0                                               | 1.0                                   | 1.0                                    | 1.5                                                | -0.04                            | 0.0002               | 0.00                            | 1.0000              |
| Stomach Total Gastrectomy              | --*                                               | --*                                   | --*                                    | 0.4                                                | -0.07                            | <.0001               | 0.00                            | 1.0000              |
| Thyroidectomy Partial                  | 0.3                                               | 0.3                                   | 0.3                                    | 0.6                                                | -0.06                            | <.0001               | 0.00                            | 1.0000              |
| Thyroidectomy Substernal               | --*                                               | --*                                   | --*                                    | 0.1                                                | -0.01                            | 0.4359               | 0.00                            | 1.0000              |
| Thyroidectomy Total                    | 0.5                                               | 0.5                                   | 0.5                                    | 0.8                                                | -0.04                            | 0.0001               | 0.00                            | 1.0000              |
| Ulcer                                  | 1.4                                               | 1.4                                   | 1.4                                    | 1.0                                                | 0.04                             | 0.0004               | 0.00                            | 1.0000              |
| <b>Unmatched Covariates</b>            |                                                   |                                       |                                        |                                                    |                                  |                      |                                 |                     |
| Emergent Admission                     | 52.7                                              | 52.7                                  | 44.9                                   | 39.7                                               | 0.26                             | <.0001               | 0.16                            | <.0001              |
| Risk Factors & Patient Demographics    |                                                   |                                       |                                        |                                                    |                                  |                      |                                 |                     |
| Age at Admission (years, mean)         | 77.0                                              | 77.0                                  | 76.9                                   | 76.8                                               | 0.03                             | 0.0131               | 0.02                            | 0.1238              |
| Age 65-69                              | 21.6                                              | 21.6                                  | 22.1                                   | 22.3                                               | -0.02                            | 0.1161               | -0.01                           | 0.3278              |
| Age 70-74                              | 23.6                                              | 23.6                                  | 23.8                                   | 23.7                                               | 0.00                             | 0.8503               | 0.00                            | 0.7514              |
| Age 75-79                              | 20.4                                              | 20.4                                  | 21.1                                   | 21.1                                               | -0.02                            | 0.1448               | -0.02                           | 0.2277              |
| Age 80-84                              | 17.9                                              | 17.9                                  | 17.4                                   | 17.4                                               | 0.01                             | 0.2200               | 0.01                            | 0.4347              |
| Age 85+                                | 16.5                                              | 16.5                                  | 15.5                                   | 15.6                                               | 0.03                             | 0.0172               | 0.03                            | 0.0442              |
| Sex (% female)                         | 56.5                                              | 56.5                                  | 55.5                                   | 57.2                                               | -0.01                            | 0.1946               | 0.02                            | 0.1702              |
| Transfer-in                            | 3.5                                               | 3.5                                   | 3.2                                    | 2.9                                                | 0.04                             | 0.0007               | 0.02                            | 0.2231              |
| Past Admission in Last 6 Months        | 28.7                                              | 28.7                                  | 27.9                                   | 27.7                                               | 0.02                             | 0.0346               | 0.02                            | 0.1860              |
| Admission after 9/30/2010              | 86.3                                              | 86.3                                  | 86.3                                   | 67.3                                               | 0.46                             | <.0001               | 0.00                            | 1.0000              |

| Covariate<br>(percent unless noted)          | All New<br>Surgeon<br>Patients<br>before<br>Match | Matched<br>New<br>Surgeon<br>Patients | Matched<br>Exp.<br>Surgeon<br>Patients | All Exp.<br>Surgeon<br>Patients<br>before<br>Match | Stand<br>Diff<br>before<br>Match | P<br>before<br>Match | Stand<br>Diff<br>after<br>Match | P<br>after<br>Match |
|----------------------------------------------|---------------------------------------------------|---------------------------------------|----------------------------------------|----------------------------------------------------|----------------------------------|----------------------|---------------------------------|---------------------|
| Admission in 2012 or 2013                    | 53.8                                              | 53.8                                  | 53.7                                   | 34.7                                               | 0.39                             | <.0001               | 0.00                            | 0.8757              |
| Probability of 30-day Death                  | 6.2                                               | 6.2                                   | 5.6                                    | 5.2                                                | 0.12                             | <.0001               | 0.08                            | <.0001              |
| Comorbidity Count (mean)                     | 4.3                                               | 4.3                                   | 4.2                                    | 4.2                                                | 0.04                             | 0.0002               | 0.02                            | 0.1055              |
| Same-Day Secondary Procedures                |                                                   |                                       |                                        |                                                    |                                  |                      |                                 |                     |
| Major Operative Therapeutic<br>Comorbidities | 43.5                                              | 43.5                                  | 42.2                                   | 41.4                                               | 0.04                             | 0.0001               | 0.03                            | 0.0755              |
| Congestive Heart Failure                     | 22.8                                              | 22.8                                  | 20.9                                   | 20.0                                               | 0.07                             | <.0001               | 0.05                            | 0.0014              |
| Past Myocardial Infarction                   | 11.2                                              | 11.2                                  | 11.1                                   | 10.5                                               | 0.02                             | 0.0196               | 0.01                            | 0.7184              |
| Past Arrhythmia                              | 30.7                                              | 30.7                                  | 31.1                                   | 29.9                                               | 0.02                             | 0.1383               | -0.01                           | 0.5391              |
| Angina                                       | 4.4                                               | 4.4                                   | 4.1                                    | 4.5                                                | 0.00                             | 0.7182               | 0.01                            | 0.3271              |
| Valvular Disease                             | 23.5                                              | 23.5                                  | 22.2                                   | 22.1                                               | 0.03                             | 0.0011               | 0.03                            | 0.0282              |
| Unstable Angina                              | 2.3                                               | 2.3                                   | 2.7                                    | 2.5                                                | -0.01                            | 0.2117               | -0.03                           | 0.0325              |
| Hypertension                                 | 85.3                                              | 85.3                                  | 84.3                                   | 84.4                                               | 0.03                             | 0.0141               | 0.03                            | 0.0362              |
| Diabetes                                     | 35.4                                              | 35.4                                  | 35.1                                   | 34.5                                               | 0.02                             | 0.0559               | 0.01                            | 0.6454              |
| Renal Dysfunction                            | 28.2                                              | 28.2                                  | 24.6                                   | 22.9                                               | 0.12                             | <.0001               | 0.08                            | <.0001              |
| Renal Failure                                | 6.5                                               | 6.5                                   | 6.2                                    | 5.8                                                | 0.03                             | 0.0052               | 0.01                            | 0.3525              |
| Liver Disease                                | 16.3                                              | 16.3                                  | 16.9                                   | 16.3                                               | 0.00                             | 0.9769               | -0.01                           | 0.3310              |
| Cancer                                       | 43.7                                              | 43.7                                  | 47.5                                   | 50.0                                               | -0.13                            | <.0001               | -0.08                           | <.0001              |
| Specific Abdominal Cancer                    | 3.1                                               | 3.1                                   | 3.4                                    | 5.3                                                | -0.11                            | <.0001               | -0.02                           | 0.2156              |
| Dementia                                     | 13.3                                              | 13.3                                  | 11.3                                   | 10.8                                               | 0.08                             | <.0001               | 0.06                            | <.0001              |
| Stroke                                       | 14.0                                              | 14.0                                  | 13.5                                   | 12.4                                               | 0.05                             | <.0001               | 0.02                            | 0.2845              |
| Seizure                                      | 2.1                                               | 2.1                                   | 1.9                                    | 1.9                                                | 0.02                             | 0.0767               | 0.02                            | 0.2876              |
| Paraplegia                                   | 2.7                                               | 2.7                                   | 2.5                                    | 2.3                                                | 0.03                             | 0.0128               | 0.01                            | 0.3701              |
| COPD                                         | 28.6                                              | 28.6                                  | 28.5                                   | 27.6                                               | 0.02                             | 0.0295               | 0.00                            | 0.9374              |
| Asthma                                       | 9.4                                               | 9.4                                   | 10.3                                   | 9.9                                                | -0.02                            | 0.1263               | -0.03                           | 0.0268              |
| Post-inflammatory Pulmonary Fibrosis         | 3.9                                               | 3.9                                   | 3.8                                    | 3.7                                                | 0.01                             | 0.2327               | 0.00                            | 0.7680              |
| Hypothyroidism                               | 23.3                                              | 23.3                                  | 23.8                                   | 23.4                                               | 0.00                             | 0.8596               | -0.01                           | 0.4322              |
| Thrombocytopenia                             | 3.1                                               | 3.1                                   | 3.5                                    | 3.2                                                | -0.01                            | 0.5041               | -0.02                           | 0.1035              |
| Collagen Vascular Disease                    | 6.1                                               | 6.1                                   | 6.6                                    | 6.3                                                | -0.01                            | 0.2906               | -0.02                           | 0.1093              |
| AIDS                                         | --*                                               | --*                                   | --*                                    | 0.1                                                | 0.00                             | 1.0000               | 0.00                            | 1.0000              |
| Chronic Peptic Ulcer                         | 0.3                                               | 0.3                                   | 0.2                                    | 0.3                                                | -0.01                            | 0.5748               | 0.01                            | 0.4879              |
| Coagulopathy                                 | 0.4                                               | 0.4                                   | 0.5                                    | 0.4                                                | 0.00                             | 0.8702               | -0.01                           | 0.6054              |
| Other Coagulopathy                           | 4.9                                               | 4.9                                   | 4.6                                    | 4.5                                                | 0.02                             | 0.0796               | 0.01                            | 0.4228              |
| Cushing's Disease                            | --*                                               | --*                                   | 0.1                                    | 0.1                                                | -0.01                            | 0.3436               | -0.01                           | 0.6474              |
| Graves' Disease                              | 0.4                                               | 0.4                                   | 0.4                                    | 0.4                                                | -0.01                            | 0.6195               | 0.00                            | 1.0000              |
| Hemoglobin Disorder                          | --*                                               | --*                                   | --*                                    | 0.0                                                | -0.01                            | 0.5015               | 0.00                            | 1.0000              |

Cells marked "--\*" are masked to comply with CMS cell size suppression rules.

P-values calculated using group tests, with Fisher's exact test used for binary and Wilcoxon rank sum used for continuous variables.

**eTable 8b. Orthopedic Surgery Operation Match**

| Covariate<br>(percent unless noted)          | All New<br>Surgeon<br>Patients<br>before<br>Match | Matched<br>New<br>Surgeon<br>Patients | Matched<br>Exp.<br>Surgeon<br>Patients | All Exp.<br>Surgeon<br>Patients<br>before<br>Match | Stand<br>Diff<br>before<br>Match | P<br>before<br>Match | Stand<br>Diff<br>after<br>Match | P<br>after<br>Match |
|----------------------------------------------|---------------------------------------------------|---------------------------------------|----------------------------------------|----------------------------------------------------|----------------------------------|----------------------|---------------------------------|---------------------|
| Number of Surgeons                           |                                                   |                                       |                                        |                                                    |                                  |                      |                                 |                     |
| Number of Patients                           | 8,260                                             | 8,260                                 | 8,260                                  | 131,045                                            |                                  |                      |                                 |                     |
| Year of admission (mean)                     | 2011.6                                            | 2011.6                                | 2011.6                                 | 2011.0                                             | 0.48                             | <.0001               | 0.00                            | 1.0000              |
| Principal Procedure Categories               |                                                   |                                       |                                        |                                                    |                                  |                      |                                 |                     |
| Hip Repair                                   | 29.7                                              | 29.7                                  | 29.7                                   | 10.4                                               | 0.50                             | <.0001               | 0.00                            | 1.0000              |
| Hip Replacement                              | 50.1                                              | 50.1                                  | 50.1                                   | 35.5                                               | 0.30                             | <.0001               | 0.00                            | 1.0000              |
| Hip Replacement Revision                     | 2.0                                               | 2.0                                   | 2.0                                    | 3.5                                                | -0.09                            | <.0001               | 0.00                            | 1.0000              |
| Knee Replacement                             | 16.8                                              | 16.8                                  | 16.8                                   | 47.3                                               | -0.69                            | <.0001               | 0.00                            | 1.0000              |
| Knee Replacement Revision                    | 1.5                                               | 1.5                                   | 1.5                                    | 3.4                                                | -0.13                            | <.0001               | 0.00                            | 1.0000              |
| <b>Unmatched Covariates</b>                  |                                                   |                                       |                                        |                                                    |                                  |                      |                                 |                     |
| Emergent Admission                           | 55.3                                              | 55.3                                  | 40.8                                   | 18.2                                               | 0.83                             | <.0001               | 0.33                            | <.0001              |
| Risk Factors & Patient Demographics          |                                                   |                                       |                                        |                                                    |                                  |                      |                                 |                     |
| Age at Admission (years, mean)               | 81.3                                              | 81.3                                  | 79.9                                   | 77.1                                               | 0.53                             | <.0001               | 0.18                            | <.0001              |
| Age 65-69                                    | 11.9                                              | 11.9                                  | 15.1                                   | 21.3                                               | -0.25                            | <.0001               | -0.09                           | <.0001              |
| Age 70-74                                    | 15.0                                              | 15.0                                  | 18.0                                   | 24.0                                               | -0.23                            | <.0001               | -0.08                           | <.0001              |
| Age 75-79                                    | 16.6                                              | 16.6                                  | 17.5                                   | 21.3                                               | -0.12                            | <.0001               | -0.02                           | 0.1066              |
| Age 80-84                                    | 19.7                                              | 19.7                                  | 19.8                                   | 16.8                                               | 0.08                             | <.0001               | 0.00                            | 0.9067              |
| Age 85+                                      | 36.9                                              | 36.9                                  | 29.6                                   | 16.6                                               | 0.47                             | <.0001               | 0.17                            | <.0001              |
| Sex (% female)                               | 70.9                                              | 70.9                                  | 69.7                                   | 65.9                                               | 0.11                             | <.0001               | 0.03                            | 0.0766              |
| Transfer-in                                  | 1.3                                               | 1.3                                   | 1.0                                    | 0.7                                                | 0.07                             | <.0001               | 0.03                            | 0.0722              |
| Past Admission in Last 6 Months              | 21.9                                              | 21.9                                  | 19.4                                   | 14.7                                               | 0.19                             | <.0001               | 0.06                            | 0.0001              |
| Admission after 9/30/2010                    | 88.7                                              | 88.7                                  | 88.7                                   | 69.2                                               | 0.49                             | <.0001               | 0.00                            | 1.0000              |
| Admission in 2012 or 2013                    | 56.3                                              | 56.3                                  | 56.3                                   | 37.7                                               | 0.38                             | <.0001               | 0.00                            | 1.0000              |
| Probability of 30-day Death                  | 4.8                                               | 4.8                                   | 3.7                                    | 1.8                                                | 0.54                             | <.0001               | 0.20                            | <.0001              |
| Comorbidity Count (mean)                     | 4.0                                               | 4.0                                   | 3.7                                    | 3.2                                                | 0.36                             | <.0001               | 0.14                            | <.0001              |
| Same-Day Secondary Procedures                |                                                   |                                       |                                        |                                                    |                                  |                      |                                 |                     |
| Major Operative Therapeutic<br>Comorbidities | 6.6                                               | 6.6                                   | 6.0                                    | 7.7                                                | -0.04                            | 0.0002               | 0.02                            | 0.1311              |
| Congestive Heart Failure                     | 21.5                                              | 21.5                                  | 18.6                                   | 12.5                                               | 0.24                             | <.0001               | 0.08                            | <.0001              |
| Past Myocardial Infarction                   | 9.4                                               | 9.4                                   | 8.7                                    | 7.1                                                | 0.08                             | <.0001               | 0.03                            | 0.1288              |
| Past Arrhythmia                              | 30.3                                              | 30.3                                  | 28.8                                   | 25.3                                               | 0.11                             | <.0001               | 0.04                            | 0.0266              |
| Angina                                       | 3.4                                               | 3.4                                   | 3.0                                    | 2.9                                                | 0.03                             | 0.0159               | 0.02                            | 0.1322              |
| Valvular Disease                             | 24.3                                              | 24.3                                  | 22.5                                   | 18.3                                               | 0.15                             | <.0001               | 0.04                            | 0.0066              |
| Unstable Angina                              | 1.3                                               | 1.3                                   | 1.2                                    | 1.0                                                | 0.03                             | 0.0067               | 0.01                            | 0.6270              |
| Hypertension                                 | 86.8                                              | 86.8                                  | 86.1                                   | 84.9                                               | 0.06                             | <.0001               | 0.02                            | 0.2282              |
| Diabetes                                     | 29.0                                              | 29.0                                  | 28.1                                   | 27.7                                               | 0.03                             | 0.0121               | 0.02                            | 0.2346              |
| Renal Dysfunction                            | 21.6                                              | 21.6                                  | 17.8                                   | 12.8                                               | 0.23                             | <.0001               | 0.10                            | <.0001              |
| Renal Failure                                | 4.4                                               | 4.4                                   | 3.7                                    | 2.6                                                | 0.10                             | <.0001               | 0.04                            | 0.0129              |
| Liver Disease                                | 3.9                                               | 3.9                                   | 3.3                                    | 3.1                                                | 0.05                             | <.0001               | 0.03                            | 0.0608              |
| Cancer                                       | 26.7                                              | 26.7                                  | 25.6                                   | 25.8                                               | 0.02                             | 0.0782               | 0.03                            | 0.0996              |
| Specific Abdominal Cancer                    | 0.5                                               | 0.5                                   | 0.4                                    | 0.2                                                | 0.05                             | <.0001               | 0.03                            | 0.1293              |
| Dementia                                     | 30.8                                              | 30.8                                  | 23.2                                   | 12.2                                               | 0.47                             | <.0001               | 0.19                            | <.0001              |
| Stroke                                       | 18.1                                              | 18.1                                  | 14.8                                   | 10.3                                               | 0.22                             | <.0001               | 0.10                            | <.0001              |
| Seizure                                      | 2.6                                               | 2.6                                   | 2.0                                    | 1.5                                                | 0.08                             | <.0001               | 0.04                            | 0.0197              |
| Paraplegia                                   | 3.1                                               | 3.1                                   | 2.5                                    | 1.3                                                | 0.12                             | <.0001               | 0.04                            | 0.0423              |
| COPD                                         | 25.8                                              | 25.8                                  | 23.8                                   | 18.5                                               | 0.18                             | <.0001               | 0.05                            | 0.0025              |
| Asthma                                       | 8.8                                               | 8.8                                   | 9.4                                    | 9.8                                                | -0.03                            | 0.0028               | -0.02                           | 0.2028              |
| Post-inflammatory Pulmonary Fibrosis         | 3.8                                               | 3.8                                   | 3.4                                    | 2.4                                                | 0.08                             | <.0001               | 0.03                            | 0.1321              |
| Hypothyroidism                               | 27.5                                              | 27.5                                  | 26.8                                   | 25.8                                               | 0.04                             | 0.0008               | 0.01                            | 0.3539              |
| Thrombocytopenia                             | 2.7                                               | 2.7                                   | 2.2                                    | 1.7                                                | 0.07                             | <.0001               | 0.04                            | 0.0267              |
| Collagen Vascular Disease                    | 7.7                                               | 7.7                                   | 8.2                                    | 8.5                                                | -0.03                            | 0.0120               | -0.02                           | 0.2737              |
| AIDS                                         | --*                                               | --*                                   | --*                                    | 0.0                                                | 0.02                             | 0.0156               | 0.01                            | 0.8035              |
| Chronic Peptic Ulcer                         | --*                                               | --*                                   | 0.1                                    | 0.1                                                | 0.01                             | 0.5189               | -0.02                           | 0.4804              |
| Coagulopathy                                 | 0.3                                               | 0.3                                   | 0.5                                    | 0.5                                                | -0.03                            | 0.0287               | -0.03                           | 0.0811              |
| Other Coagulopathy                           | 4.0                                               | 4.0                                   | 3.7                                    | 3.6                                                | 0.02                             | 0.0677               | 0.02                            | 0.3300              |
| Cushing's Disease                            | --*                                               | --*                                   | --*                                    | 0.1                                                | 0.00                             | 1.0000               | -0.01                           | 0.7265              |

| <b>Covariate<br/>(percent unless noted)</b> | <b>All New<br/>Surgeon<br/>Patients<br/>before<br/>Match</b> | <b>Matched<br/>New<br/>Surgeon<br/>Patients</b> | <b>Matched<br/>Exp.<br/>Surgeon<br/>Patients</b> | <b>All Exp.<br/>Surgeon<br/>Patients<br/>before<br/>Match</b> | <b>Stand<br/>Diff<br/>before<br/>Match</b> | <b>P<br/>before<br/>Match</b> | <b>Stand<br/>Diff<br/>after<br/>Match</b> | <b>P<br/>after<br/>Match</b> |
|---------------------------------------------|--------------------------------------------------------------|-------------------------------------------------|--------------------------------------------------|---------------------------------------------------------------|--------------------------------------------|-------------------------------|-------------------------------------------|------------------------------|
| Graves' Disease                             | 0.3                                                          | 0.3                                             | 0.2                                              | 0.3                                                           | 0.01                                       | 0.6043                        | 0.02                                      | 0.3013                       |
| Hemoglobin Disorder                         | --*                                                          | --*                                             | --*                                              | 0.0                                                           | 0.01                                       | 0.3563                        | -0.03                                     | 0.4530                       |

Cells marked "--\*" are masked to comply with CMS cell size suppression rules.

P-values calculated using group tests, with Fisher's exact test used for binary and Wilcoxon rank sum used for continuous variables.

**eTable 9. Complete Matching Tables for Emergent Status Match** Displays the covariate balance when new and experienced surgeon patients were paired only on year of admission, procedure, and emergent status. Covariates not included in the matching algorithm are displayed below the horizontal line.

| Covariate<br>(percent unless noted)    | All New<br>Surgeon<br>Patients<br>before<br>Match | Matched<br>New<br>Surgeon<br>Patients | Matched<br>Exp.<br>Surgeon<br>Patients | All Exp.<br>Surgeon<br>Patients<br>before<br>Match | Stand<br>Diff<br>before<br>Match | P<br>before<br>Match | Stand<br>Diff<br>after<br>Match | P<br>after<br>Match |
|----------------------------------------|---------------------------------------------------|---------------------------------------|----------------------------------------|----------------------------------------------------|----------------------------------|----------------------|---------------------------------|---------------------|
| Number of Surgeons                     |                                                   |                                       |                                        |                                                    |                                  |                      |                                 |                     |
| Number of Patients                     | 18,200                                            | 18,200                                | 18,200                                 | 203,113                                            |                                  |                      |                                 |                     |
| Year of admission (mean)               | 2011.5                                            | 2011.5                                | 2011.5                                 | 2011.0                                             | 0.47                             | <.0001               | 0.00                            | 0.7644              |
| Principal Procedure Categories         |                                                   |                                       |                                        |                                                    |                                  |                      |                                 |                     |
| General Surgery                        |                                                   |                                       |                                        |                                                    |                                  |                      |                                 |                     |
| Adrenalectomy                          | 0.3                                               | 0.3                                   | 0.3                                    | 0.3                                                | 0.00                             | 0.8358               | 0.00                            | 1.0000              |
| Appendectomy                           | 5.3                                               | 5.3                                   | 5.3                                    | 3.9                                                | 0.07                             | <.0001               | 0.00                            | 1.0000              |
| Bariatric                              | 0.5                                               | 0.5                                   | 0.5                                    | 0.6                                                | -0.01                            | 0.2398               | 0.00                            | 1.0000              |
| Biliary common duct                    | --*                                               | --*                                   | --*                                    | 0.1                                                | -0.01                            | 0.6182               | 0.00                            | 1.0000              |
| Biliary other                          | --*                                               | --*                                   | --*                                    | 0.4                                                | -0.06                            | <.0001               | 0.00                            | 1.0000              |
| Cholecystectomy                        | 29.8                                              | 29.8                                  | 29.8                                   | 25.4                                               | 0.10                             | <.0001               | 0.00                            | 1.0000              |
| Colectomy Partial – Lap                | 9.1                                               | 9.1                                   | 9.1                                    | 10.0                                               | -0.03                            | 0.0044               | 0.00                            | 1.0000              |
| Colectomy Partial – Open               | 18.0                                              | 18.0                                  | 18.0                                   | 17.7                                               | 0.01                             | 0.4414               | 0.00                            | 1.0000              |
| Colectomy Total – Lap                  | 0.3                                               | 0.3                                   | 0.3                                    | 0.2                                                | 0.02                             | 0.0570               | 0.00                            | 1.0000              |
| Colectomy Total – Open                 | 1.2                                               | 1.2                                   | 1.2                                    | 1.0                                                | 0.02                             | 0.1033               | 0.00                            | 1.0000              |
| Esophagectomy                          | --*                                               | --*                                   | --*                                    | 0.2                                                | -0.03                            | 0.0157               | 0.00                            | 1.0000              |
| Esophagomyotomy                        | --*                                               | --*                                   | --*                                    | 0.2                                                | -0.02                            | 0.0563               | 0.00                            | 1.0000              |
| Hernia Abdominal – Lap                 | 1.5                                               | 1.5                                   | 1.5                                    | 1.3                                                | 0.01                             | 0.3790               | 0.00                            | 1.0000              |
| Hernia Abdominal – Open                | 3.3                                               | 3.3                                   | 3.3                                    | 5.3                                                | -0.10                            | <.0001               | 0.00                            | 1.0000              |
| Hernia Groin – Lap                     | 0.4                                               | 0.4                                   | 0.4                                    | 0.5                                                | -0.01                            | 0.2948               | 0.00                            | 1.0000              |
| Hernia Groin – Open                    | 3.6                                               | 3.6                                   | 3.6                                    | 3.2                                                | 0.02                             | 0.0608               | 0.00                            | 1.0000              |
| Large Bowel Other                      | 0.8                                               | 0.8                                   | 0.8                                    | 0.8                                                | 0.00                             | 1.0000               | 0.00                            | 1.0000              |
| Liver Other                            | --*                                               | --*                                   | --*                                    | 0.1                                                | -0.03                            | 0.0188               | 0.00                            | 1.0000              |
| Liver Partial Hepatectomy              | 0.3                                               | 0.3                                   | 0.3                                    | 0.7                                                | -0.05                            | <.0001               | 0.00                            | 1.0000              |
| Lysis of Adhesions                     | 5.6                                               | 5.6                                   | 5.6                                    | 5.1                                                | 0.02                             | 0.0274               | 0.00                            | 1.0000              |
| Mastectomy                             | 1.4                                               | 1.4                                   | 1.4                                    | 2.6                                                | -0.09                            | <.0001               | 0.00                            | 1.0000              |
| Pancreatectomy                         | 0.7                                               | 0.7                                   | 0.7                                    | 1.8                                                | -0.09                            | <.0001               | 0.00                            | 1.0000              |
| Parathyroidectomy                      | 0.3                                               | 0.3                                   | 0.3                                    | 0.8                                                | -0.06                            | <.0001               | 0.00                            | 1.0000              |
| PD Access Procedure                    | 0.3                                               | 0.3                                   | 0.3                                    | 0.3                                                | 0.01                             | 0.4042               | 0.00                            | 1.0000              |
| Proctectomy                            | 2.9                                               | 2.9                                   | 2.9                                    | 3.1                                                | -0.01                            | 0.2904               | 0.00                            | 1.0000              |
| Proctopexy                             | 0.1                                               | 0.1                                   | 0.1                                    | 0.1                                                | 0.00                             | 0.8702               | 0.00                            | 1.0000              |
| Pyloroplasty                           | 0.2                                               | 0.2                                   | 0.2                                    | 0.1                                                | 0.01                             | 0.3695               | 0.00                            | 1.0000              |
| Small Bowel Other                      | 0.8                                               | 0.8                                   | 0.8                                    | 0.7                                                | 0.00                             | 0.6610               | 0.00                            | 1.0000              |
| Small Bowel Resection                  | 8.3                                               | 8.3                                   | 8.3                                    | 6.6                                                | 0.07                             | <.0001               | 0.00                            | 1.0000              |
| Splenectomy                            | 0.7                                               | 0.7                                   | 0.7                                    | 0.8                                                | -0.01                            | 0.2853               | 0.00                            | 1.0000              |
| Stomach Anti-Reflux                    | 0.3                                               | 0.3                                   | 0.3                                    | 1.0                                                | -0.09                            | <.0001               | 0.00                            | 1.0000              |
| Stomach Gastric Bypass (non-bariatric) | 0.3                                               | 0.3                                   | 0.3                                    | 0.5                                                | -0.03                            | 0.0090               | 0.00                            | 1.0000              |
| Stomach Other                          | 0.3                                               | 0.3                                   | 0.3                                    | 0.3                                                | -0.01                            | 0.5090               | 0.00                            | 1.0000              |
| Stomach Partial Gastrectomy            | 1.0                                               | 1.0                                   | 1.0                                    | 1.5                                                | -0.04                            | 0.0002               | 0.00                            | 1.0000              |
| Stomach Total Gastrectomy              | --*                                               | --*                                   | --*                                    | 0.4                                                | -0.07                            | <.0001               | 0.00                            | 1.0000              |
| Thyroidectomy Partial                  | 0.3                                               | 0.3                                   | 0.3                                    | 0.6                                                | -0.06                            | <.0001               | 0.00                            | 1.0000              |
| Thyroidectomy Substernal               | --*                                               | --*                                   | --*                                    | 0.1                                                | -0.01                            | 0.4359               | 0.00                            | 1.0000              |
| Thyroidectomy Total                    | 0.5                                               | 0.5                                   | 0.5                                    | 0.8                                                | -0.04                            | 0.0001               | 0.00                            | 1.0000              |
| Ulcer                                  | 1.4                                               | 1.4                                   | 1.4                                    | 1.0                                                | 0.04                             | 0.0004               | 0.00                            | 1.0000              |
| Orthopedic Surgery                     |                                                   |                                       |                                        |                                                    |                                  |                      |                                 |                     |
| Hip Repair                             | 29.7                                              | 29.7                                  | 29.7                                   | 10.4                                               | 0.50                             | <.0001               | 0.00                            | 1.0000              |
| Hip Replacement                        | 50.1                                              | 50.1                                  | 50.1                                   | 35.5                                               | 0.30                             | <.0001               | 0.00                            | 1.0000              |
| Hip Replacement Revision               | 2.0                                               | 2.0                                   | 2.0                                    | 3.5                                                | -0.09                            | <.0001               | 0.00                            | 1.0000              |
| Knee Replacement                       | 16.8                                              | 16.8                                  | 16.8                                   | 47.3                                               | -0.69                            | <.0001               | 0.00                            | 1.0000              |
| Knee Replacement Revision              | 1.5                                               | 1.5                                   | 1.5                                    | 3.4                                                | -0.13                            | <.0001               | 0.00                            | 1.0000              |
| Emergent Admission                     | 53.9                                              | 53.9                                  | 53.9                                   | 25.8                                               | 0.60                             | <.0001               | 0.00                            | 1.0000              |
| <b>Unmatched Covariates</b>            |                                                   |                                       |                                        |                                                    |                                  |                      |                                 |                     |
| Risk Factors & Patient Demographics    |                                                   |                                       |                                        |                                                    |                                  |                      |                                 |                     |

| Covariate<br>(percent unless noted)  | All New<br>Surgeon<br>Patients<br>before<br>Match | Matched<br>New<br>Surgeon<br>Patients | Matched<br>Exp.<br>Surgeon<br>Patients | All Exp.<br>Surgeon<br>Patients<br>before<br>Match | Stand<br>Diff<br>before<br>Match | P<br>before<br>Match | Stand<br>Diff<br>after<br>Match | P<br>after<br>Match |
|--------------------------------------|---------------------------------------------------|---------------------------------------|----------------------------------------|----------------------------------------------------|----------------------------------|----------------------|---------------------------------|---------------------|
| Age at Admission (years, mean)       | 79.0                                              | 79.0                                  | 78.7                                   | 77.0                                               | 0.25                             | <.0001               | 0.04                            | 0.0006              |
| Age 65-69                            | 17.2                                              | 17.2                                  | 18.1                                   | 21.6                                               | -0.11                            | <.0001               | -0.02                           | 0.0187              |
| Age 70-74                            | 19.7                                              | 19.7                                  | 19.9                                   | 23.9                                               | -0.10                            | <.0001               | 0.00                            | 0.6358              |
| Age 75-79                            | 18.7                                              | 18.7                                  | 19.1                                   | 21.2                                               | -0.06                            | <.0001               | -0.01                           | 0.2841              |
| Age 80-84                            | 18.7                                              | 18.7                                  | 18.8                                   | 17.0                                               | 0.04                             | <.0001               | 0.00                            | 0.7883              |
| Age 85+                              | 25.8                                              | 25.8                                  | 24.1                                   | 16.3                                               | 0.24                             | <.0001               | 0.04                            | 0.0002              |
| Sex (% female)                       | 63.0                                              | 63.0                                  | 62.5                                   | 62.8                                               | 0.00                             | 0.5862               | 0.01                            | 0.3455              |
| Transfer-in                          | 2.5                                               | 2.5                                   | 1.9                                    | 1.5                                                | 0.08                             | <.0001               | 0.05                            | <.0001              |
| Past Admission in Last 6 Months      | 25.6                                              | 25.6                                  | 24.5                                   | 19.3                                               | 0.15                             | <.0001               | 0.03                            | 0.0132              |
| Admission after 9/30/2010            | 87.4                                              | 87.4                                  | 87.4                                   | 68.5                                               | 0.47                             | <.0001               | 0.00                            | 1.0000              |
| Admission in 2012 or 2013            | 54.9                                              | 54.9                                  | 54.8                                   | 36.6                                               | 0.37                             | <.0001               | 0.00                            | 0.8414              |
| Probability of 30-day Death          | 5.6                                               | 5.6                                   | 5.2                                    | 3.0                                                | 0.35                             | <.0001               | 0.06                            | <.0001              |
| Comorbidity Count (mean)             | 4.1                                               | 4.1                                   | 4.0                                    | 3.5                                                | 0.26                             | <.0001               | 0.04                            | <.0001              |
| Same-Day Secondary Procedures        |                                                   |                                       |                                        |                                                    |                                  |                      |                                 |                     |
| Major Operative Therapeutic          | 26.7                                              | 26.7                                  | 25.6                                   | 19.7                                               | 0.17                             | <.0001               | 0.03                            | 0.0131              |
| Comorbidities                        |                                                   |                                       |                                        |                                                    |                                  |                      |                                 |                     |
| Congestive Heart Failure             | 22.2                                              | 22.2                                  | 20.5                                   | 15.2                                               | 0.18                             | <.0001               | 0.04                            | 0.0001              |
| Past Myocardial Infarction           | 10.4                                              | 10.4                                  | 9.9                                    | 8.3                                                | 0.07                             | <.0001               | 0.02                            | 0.0954              |
| Past Arrhythmia                      | 30.5                                              | 30.5                                  | 30.3                                   | 26.9                                               | 0.08                             | <.0001               | 0.01                            | 0.6001              |
| Angina                               | 4.0                                               | 4.0                                   | 3.5                                    | 3.5                                                | 0.02                             | 0.0012               | 0.02                            | 0.0292              |
| Valvular Disease                     | 23.9                                              | 23.9                                  | 22.8                                   | 19.6                                               | 0.10                             | <.0001               | 0.03                            | 0.0163              |
| Unstable Angina                      | 1.8                                               | 1.8                                   | 2.0                                    | 1.5                                                | 0.02                             | 0.0015               | -0.01                           | 0.4411              |
| Hypertension                         | 86.0                                              | 86.0                                  | 85.1                                   | 84.7                                               | 0.04                             | <.0001               | 0.02                            | 0.0178              |
| Diabetes                             | 32.5                                              | 32.5                                  | 31.9                                   | 30.1                                               | 0.05                             | <.0001               | 0.01                            | 0.2301              |
| Renal Dysfunction                    | 25.2                                              | 25.2                                  | 22.6                                   | 16.4                                               | 0.22                             | <.0001               | 0.06                            | <.0001              |
| Renal Failure                        | 5.6                                               | 5.6                                   | 5.2                                    | 3.7                                                | 0.09                             | <.0001               | 0.02                            | 0.0772              |
| Liver Disease                        | 10.7                                              | 10.7                                  | 10.8                                   | 7.8                                                | 0.10                             | <.0001               | 0.00                            | 0.7478              |
| Cancer                               | 36.0                                              | 36.0                                  | 37.4                                   | 34.4                                               | 0.03                             | <.0001               | -0.03                           | 0.0059              |
| Specific Abdominal Cancer            | 1.9                                               | 1.9                                   | 2.0                                    | 2.0                                                | -0.01                            | 0.4093               | 0.00                            | 0.9697              |
| Dementia                             | 21.2                                              | 21.2                                  | 18.4                                   | 11.7                                               | 0.26                             | <.0001               | 0.08                            | <.0001              |
| Stroke                               | 15.9                                              | 15.9                                  | 15.1                                   | 11.0                                               | 0.14                             | <.0001               | 0.02                            | 0.0522              |
| Seizure                              | 2.3                                               | 2.3                                   | 2.1                                    | 1.6                                                | 0.05                             | <.0001               | 0.01                            | 0.2421              |
| Paraplegia                           | 2.9                                               | 2.9                                   | 2.7                                    | 1.7                                                | 0.08                             | <.0001               | 0.01                            | 0.3543              |
| COPD                                 | 27.3                                              | 27.3                                  | 26.7                                   | 21.7                                               | 0.13                             | <.0001               | 0.01                            | 0.2024              |
| Asthma                               | 9.1                                               | 9.1                                   | 9.7                                    | 9.8                                                | -0.02                            | 0.0021               | -0.02                           | 0.0695              |
| Post-inflammatory Pulmonary Fibrosis | 3.9                                               | 3.9                                   | 3.8                                    | 2.8                                                | 0.06                             | <.0001               | 0.01                            | 0.6219              |
| Hypothyroidism                       | 25.2                                              | 25.2                                  | 25.4                                   | 25.0                                               | 0.01                             | 0.4475               | -0.01                           | 0.6383              |
| Thrombocytopenia                     | 2.9                                               | 2.9                                   | 2.9                                    | 2.3                                                | 0.04                             | <.0001               | 0.00                            | 0.8270              |
| Collagen Vascular Disease            | 6.8                                               | 6.8                                   | 7.3                                    | 7.7                                                | -0.04                            | <.0001               | -0.02                           | 0.0683              |
| AIDS                                 | 0.1                                               | 0.1                                   | 0.1                                    | 0.1                                                | 0.01                             | 0.0569               | 0.00                            | 0.8600              |
| Chronic Peptic Ulcer                 | 0.2                                               | 0.2                                   | 0.2                                    | 0.2                                                | 0.01                             | 0.2543               | 0.00                            | 0.8098              |
| Coagulopathy                         | 0.4                                               | 0.4                                   | 0.5                                    | 0.5                                                | -0.01                            | 0.1639               | -0.01                           | 0.2906              |
| Other Coagulopathy                   | 4.5                                               | 4.5                                   | 4.4                                    | 3.9                                                | 0.03                             | 0.0002               | 0.00                            | 0.7209              |
| Cushing's Disease                    | 0.1                                               | 0.1                                   | 0.1                                    | 0.1                                                | 0.00                             | 0.7697               | -0.01                           | 0.4419              |
| Graves' Disease                      | 0.4                                               | 0.4                                   | 0.3                                    | 0.3                                                | 0.00                             | 0.7414               | 0.01                            | 0.4665              |
| Hemoglobin Disorder                  | --*                                               | --*                                   | --*                                    | 0.0                                                | 0.00                             | 1.0000               | -0.02                           | 0.1459              |

Cells marked "--\*" are masked to comply with CMS cell size suppression rules.

P-values calculated using group tests, with Fisher's exact test used for binary and Wilcoxon rank sum used for continuous variables.



**eTable 9a. General Surgery Emergent Status Match**

| Covariate<br>(percent unless noted)    | All New<br>Surgeon<br>Patients<br>before<br>Match | Matched<br>New<br>Surgeon<br>Patients | Matched<br>Exp.<br>Surgeon<br>Patients | All Exp.<br>Surgeon<br>Patients<br>before<br>Match | Stand<br>Diff<br>before<br>Match | P<br>before<br>Match | Stand<br>Diff<br>after<br>Match | P<br>after<br>Match |
|----------------------------------------|---------------------------------------------------|---------------------------------------|----------------------------------------|----------------------------------------------------|----------------------------------|----------------------|---------------------------------|---------------------|
| Number of Surgeons                     |                                                   |                                       |                                        |                                                    |                                  |                      |                                 |                     |
| Number of Patients                     | 9,940                                             | 9,940                                 | 9,940                                  | 72,068                                             |                                  |                      |                                 |                     |
| Year of admission (mean)               | 2011.5                                            | 2011.5                                | 2011.5                                 | 2010.9                                             | 0.48                             | <.0001               | 0.01                            | 0.6858              |
| Principal Procedure Categories         |                                                   |                                       |                                        |                                                    |                                  |                      |                                 |                     |
| Adrenalectomy                          |                                                   |                                       |                                        |                                                    |                                  |                      |                                 |                     |
| Appendectomy                           | 0.3                                               | 0.3                                   | 0.3                                    | 0.3                                                | 0.00                             | 0.8358               | 0.00                            | 1.0000              |
| Bariatric                              | 5.3                                               | 5.3                                   | 5.3                                    | 3.9                                                | 0.07                             | <.0001               | 0.00                            | 1.0000              |
| Biliary common duct                    | 0.5                                               | 0.5                                   | 0.5                                    | 0.6                                                | -0.01                            | 0.2398               | 0.00                            | 1.0000              |
| Biliary other                          | --*                                               | --*                                   | --*                                    | 0.1                                                | -0.01                            | 0.6182               | 0.00                            | 1.0000              |
| Cholecystectomy                        | --*                                               | --*                                   | --*                                    | 0.4                                                | -0.06                            | <.0001               | 0.00                            | 1.0000              |
| Colectomy Partial – Lap                | 29.8                                              | 29.8                                  | 29.8                                   | 25.4                                               | 0.10                             | <.0001               | 0.00                            | 1.0000              |
| Colectomy Partial – Open               | 9.1                                               | 9.1                                   | 9.1                                    | 10.0                                               | -0.03                            | 0.0044               | 0.00                            | 1.0000              |
| Colectomy Total – Lap                  | 18.0                                              | 18.0                                  | 18.0                                   | 17.7                                               | 0.01                             | 0.4414               | 0.00                            | 1.0000              |
| Colectomy Total – Open                 | 0.3                                               | 0.3                                   | 0.3                                    | 0.2                                                | 0.02                             | 0.0570               | 0.00                            | 1.0000              |
| Esophagectomy                          | 1.2                                               | 1.2                                   | 1.2                                    | 1.0                                                | 0.02                             | 0.1033               | 0.00                            | 1.0000              |
| Esophagomyotomy                        | --*                                               | --*                                   | --*                                    | 0.2                                                | -0.03                            | 0.0157               | 0.00                            | 1.0000              |
| Hernia Abdominal – Lap                 | --*                                               | --*                                   | --*                                    | 0.2                                                | -0.02                            | 0.0563               | 0.00                            | 1.0000              |
| Hernia Abdominal – Open                | 1.5                                               | 1.5                                   | 1.5                                    | 1.3                                                | 0.01                             | 0.3790               | 0.00                            | 1.0000              |
| Hernia Groin – Lap                     | 3.3                                               | 3.3                                   | 3.3                                    | 5.3                                                | -0.10                            | <.0001               | 0.00                            | 1.0000              |
| Hernia Groin – Open                    | 0.4                                               | 0.4                                   | 0.4                                    | 0.5                                                | -0.01                            | 0.2948               | 0.00                            | 1.0000              |
| Large Bowel Other                      | 3.6                                               | 3.6                                   | 3.6                                    | 3.2                                                | 0.02                             | 0.0608               | 0.00                            | 1.0000              |
| Liver Other                            | 0.8                                               | 0.8                                   | 0.8                                    | 0.8                                                | 0.00                             | 1.0000               | 0.00                            | 1.0000              |
| Liver Partial Hepatectomy              | --*                                               | --*                                   | --*                                    | 0.1                                                | -0.03                            | 0.0188               | 0.00                            | 1.0000              |
| Lysis of Adhesions                     | 0.3                                               | 0.3                                   | 0.3                                    | 0.7                                                | -0.05                            | <.0001               | 0.00                            | 1.0000              |
| Mastectomy                             | 5.6                                               | 5.6                                   | 5.6                                    | 5.1                                                | 0.02                             | 0.0274               | 0.00                            | 1.0000              |
| Pancreatectomy                         | 1.4                                               | 1.4                                   | 1.4                                    | 2.6                                                | -0.09                            | <.0001               | 0.00                            | 1.0000              |
| Parathyroidectomy                      | 0.7                                               | 0.7                                   | 0.7                                    | 1.8                                                | -0.09                            | <.0001               | 0.00                            | 1.0000              |
| PD Access Procedure                    | 0.3                                               | 0.3                                   | 0.3                                    | 0.8                                                | -0.06                            | <.0001               | 0.00                            | 1.0000              |
| Proctectomy                            | 0.3                                               | 0.3                                   | 0.3                                    | 0.3                                                | 0.01                             | 0.4042               | 0.00                            | 1.0000              |
| Proctopexy                             | 2.9                                               | 2.9                                   | 2.9                                    | 3.1                                                | -0.01                            | 0.2904               | 0.00                            | 1.0000              |
| Pyloroplasty                           | 0.1                                               | 0.1                                   | 0.1                                    | 0.1                                                | 0.00                             | 0.8702               | 0.00                            | 1.0000              |
| Small Bowel Other                      | 0.2                                               | 0.2                                   | 0.2                                    | 0.1                                                | 0.01                             | 0.3695               | 0.00                            | 1.0000              |
| Small Bowel Resection                  | 0.8                                               | 0.8                                   | 0.8                                    | 0.7                                                | 0.00                             | 0.6610               | 0.00                            | 1.0000              |
| Splenectomy                            | 8.3                                               | 8.3                                   | 8.3                                    | 6.6                                                | 0.07                             | <.0001               | 0.00                            | 1.0000              |
| Stomach Anti-Reflux                    | 0.7                                               | 0.7                                   | 0.7                                    | 0.8                                                | -0.01                            | 0.2853               | 0.00                            | 1.0000              |
| Stomach Gastric Bypass (non-bariatric) | 0.3                                               | 0.3                                   | 0.3                                    | 1.0                                                | -0.09                            | <.0001               | 0.00                            | 1.0000              |
| Stomach Other                          | 0.3                                               | 0.3                                   | 0.3                                    | 0.5                                                | -0.03                            | 0.0090               | 0.00                            | 1.0000              |
| Stomach Partial Gastrectomy            | 0.3                                               | 0.3                                   | 0.3                                    | 0.3                                                | -0.01                            | 0.5090               | 0.00                            | 1.0000              |
| Stomach Total Gastrectomy              | 1.0                                               | 1.0                                   | 1.0                                    | 1.5                                                | -0.04                            | 0.0002               | 0.00                            | 1.0000              |
| Thyroidectomy Partial                  | --*                                               | --*                                   | --*                                    | 0.4                                                | -0.07                            | <.0001               | 0.00                            | 1.0000              |
| Thyroidectomy Substernal               | 0.3                                               | 0.3                                   | 0.3                                    | 0.6                                                | -0.06                            | <.0001               | 0.00                            | 1.0000              |
| Thyroidectomy Total                    | --*                                               | --*                                   | --*                                    | 0.1                                                | -0.01                            | 0.4359               | 0.00                            | 1.0000              |
| Ulcer                                  | 0.5                                               | 0.5                                   | 0.5                                    | 0.8                                                | -0.04                            | 0.0001               | 0.00                            | 1.0000              |
| Emergent Admission                     | 1.4                                               | 1.4                                   | 1.4                                    | 1.0                                                | 0.04                             | 0.0004               | 0.00                            | 1.0000              |
| <b>Unmatched Covariates</b>            |                                                   |                                       |                                        |                                                    |                                  |                      |                                 |                     |
| Risk Factors & Patient Demographics    |                                                   |                                       |                                        |                                                    |                                  |                      |                                 |                     |
| Age at Admission (years, mean)         | 77.0                                              | 77.0                                  | 76.9                                   | 76.8                                               | 0.03                             | 0.0131               | 0.01                            | 0.3339              |
| Age 65-69                              | 21.6                                              | 21.6                                  | 22.3                                   | 22.3                                               | -0.02                            | 0.1161               | -0.02                           | 0.2300              |
| Age 70-74                              | 23.6                                              | 23.6                                  | 23.0                                   | 23.7                                               | 0.00                             | 0.8503               | 0.01                            | 0.3391              |
| Age 75-79                              | 20.4                                              | 20.4                                  | 21.1                                   | 21.1                                               | -0.02                            | 0.1448               | -0.02                           | 0.2859              |
| Age 80-84                              | 17.9                                              | 17.9                                  | 17.9                                   | 17.4                                               | 0.01                             | 0.2200               | 0.00                            | 0.9705              |
| Age 85+                                | 16.5                                              | 16.5                                  | 15.7                                   | 15.6                                               | 0.03                             | 0.0172               | 0.02                            | 0.1377              |
| Sex (% female)                         | 56.5                                              | 56.5                                  | 56.0                                   | 57.2                                               | -0.01                            | 0.1946               | 0.01                            | 0.4836              |
| Transfer-in                            | 3.5                                               | 3.5                                   | 2.9                                    | 2.9                                                | 0.04                             | 0.0007               | 0.04                            | 0.0068              |
| Past Admission in Last 6 Months        | 28.7                                              | 28.7                                  | 27.8                                   | 27.7                                               | 0.02                             | 0.0346               | 0.02                            | 0.1518              |
| Admission after 9/30/2010              | 86.3                                              | 86.3                                  | 86.3                                   | 67.3                                               | 0.46                             | <.0001               | 0.00                            | 1.0000              |

| Covariate<br>(percent unless noted)          | All New<br>Surgeon<br>Patients<br>before<br>Match | Matched<br>New<br>Surgeon<br>Patients | Matched<br>Exp.<br>Surgeon<br>Patients | All Exp.<br>Surgeon<br>Patients<br>before<br>Match | Stand<br>Diff<br>before<br>Match | P<br>before<br>Match | Stand<br>Diff<br>after<br>Match | P<br>after<br>Match |
|----------------------------------------------|---------------------------------------------------|---------------------------------------|----------------------------------------|----------------------------------------------------|----------------------------------|----------------------|---------------------------------|---------------------|
| Admission in 2012 or 2013                    | 53.8                                              | 53.8                                  | 53.6                                   | 34.7                                               | 0.39                             | <.0001               | 0.00                            | 0.7870              |
| Probability of 30-day Death                  | 6.2                                               | 6.2                                   | 5.9                                    | 5.2                                                | 0.12                             | <.0001               | 0.04                            | 0.0017              |
| Comorbidity Count (mean)                     | 4.3                                               | 4.3                                   | 4.2                                    | 4.2                                                | 0.04                             | 0.0002               | 0.02                            | 0.0928              |
| Same-Day Secondary Procedures                |                                                   |                                       |                                        |                                                    |                                  |                      |                                 |                     |
| Major Operative Therapeutic<br>Comorbidities | 43.5                                              | 43.5                                  | 42.0                                   | 41.4                                               | 0.04                             | 0.0001               | 0.03                            | 0.0304              |
| Congestive Heart Failure                     | 22.8                                              | 22.8                                  | 20.9                                   | 20.0                                               | 0.07                             | <.0001               | 0.05                            | 0.0017              |
| Past Myocardial Infarction                   | 11.2                                              | 11.2                                  | 10.6                                   | 10.5                                               | 0.02                             | 0.0196               | 0.02                            | 0.1798              |
| Past Arrhythmia                              | 30.7                                              | 30.7                                  | 31.2                                   | 29.9                                               | 0.02                             | 0.1383               | -0.01                           | 0.3903              |
| Angina                                       | 4.4                                               | 4.4                                   | 4.0                                    | 4.5                                                | 0.00                             | 0.7182               | 0.02                            | 0.1483              |
| Valvular Disease                             | 23.5                                              | 23.5                                  | 22.4                                   | 22.1                                               | 0.03                             | 0.0011               | 0.03                            | 0.0484              |
| Unstable Angina                              | 2.3                                               | 2.3                                   | 2.6                                    | 2.5                                                | -0.01                            | 0.2117               | -0.02                           | 0.1072              |
| Hypertension                                 | 85.3                                              | 85.3                                  | 84.0                                   | 84.4                                               | 0.03                             | 0.0141               | 0.04                            | 0.0099              |
| Diabetes                                     | 35.4                                              | 35.4                                  | 34.9                                   | 34.5                                               | 0.02                             | 0.0559               | 0.01                            | 0.4488              |
| Renal Dysfunction                            | 28.2                                              | 28.2                                  | 25.3                                   | 22.9                                               | 0.12                             | <.0001               | 0.07                            | <.0001              |
| Renal Failure                                | 6.5                                               | 6.5                                   | 6.1                                    | 5.8                                                | 0.03                             | 0.0052               | 0.02                            | 0.2096              |
| Liver Disease                                | 16.3                                              | 16.3                                  | 17.0                                   | 16.3                                               | 0.00                             | 0.9769               | -0.02                           | 0.2161              |
| Cancer                                       | 43.7                                              | 43.7                                  | 47.1                                   | 50.0                                               | -0.13                            | <.0001               | -0.07                           | <.0001              |
| Specific Abdominal Cancer                    | 3.1                                               | 3.1                                   | 3.3                                    | 5.3                                                | -0.11                            | <.0001               | -0.01                           | 0.5181              |
| Dementia                                     | 13.3                                              | 13.3                                  | 11.5                                   | 10.8                                               | 0.08                             | <.0001               | 0.05                            | 0.0002              |
| Stroke                                       | 14.0                                              | 14.0                                  | 14.0                                   | 12.4                                               | 0.05                             | <.0001               | 0.00                            | 1.0000              |
| Seizure                                      | 2.1                                               | 2.1                                   | 2.0                                    | 1.9                                                | 0.02                             | 0.0767               | 0.01                            | 0.5479              |
| Paraplegia                                   | 2.7                                               | 2.7                                   | 2.6                                    | 2.3                                                | 0.03                             | 0.0128               | 0.00                            | 0.8252              |
| COPD                                         | 28.6                                              | 28.6                                  | 28.4                                   | 27.6                                               | 0.02                             | 0.0295               | 0.00                            | 0.8016              |
| Asthma                                       | 9.4                                               | 9.4                                   | 10.0                                   | 9.9                                                | -0.02                            | 0.1263               | -0.02                           | 0.1311              |
| Post-inflammatory Pulmonary Fibrosis         | 3.9                                               | 3.9                                   | 4.0                                    | 3.7                                                | 0.01                             | 0.2327               | 0.00                            | 0.8551              |
| Hypothyroidism                               | 23.3                                              | 23.3                                  | 23.7                                   | 23.4                                               | 0.00                             | 0.8596               | -0.01                           | 0.5361              |
| Thrombocytopenia                             | 3.1                                               | 3.1                                   | 3.4                                    | 3.2                                                | -0.01                            | 0.5041               | -0.02                           | 0.3151              |
| Collagen Vascular Disease                    | 6.1                                               | 6.1                                   | 6.7                                    | 6.3                                                | -0.01                            | 0.2906               | -0.03                           | 0.0812              |
| AIDS                                         | --*                                               | --*                                   | --*                                    | 0.1                                                | 0.00                             | 1.0000               | 0.01                            | 0.7905              |
| Chronic Peptic Ulcer                         | 0.3                                               | 0.3                                   | 0.2                                    | 0.3                                                | -0.01                            | 0.5748               | 0.01                            | 0.4879              |
| Coagulopathy                                 | 0.4                                               | 0.4                                   | 0.4                                    | 0.4                                                | 0.00                             | 0.8702               | 0.00                            | 1.0000              |
| Other Coagulopathy                           | 4.9                                               | 4.9                                   | 4.7                                    | 4.5                                                | 0.02                             | 0.0796               | 0.01                            | 0.6904              |
| Cushing's Disease                            | --*                                               | --*                                   | 0.1                                    | 0.1                                                | -0.01                            | 0.3436               | -0.01                           | 0.5032              |
| Graves' Disease                              | 0.4                                               | 0.4                                   | 0.3                                    | 0.4                                                | -0.01                            | 0.6195               | 0.01                            | 0.7235              |
| Hemoglobin Disorder                          | --*                                               | --*                                   | --*                                    | 0.0                                                | -0.01                            | 0.5015               | -0.01                           | 0.6250              |

Cells marked "--\*" are masked to comply with CMS cell size suppression rules.

P-values calculated using group tests, with Fisher's exact test used for binary and Wilcoxon rank sum used for continuous variables.

**eTable 9b. Orthopedic Surgery Emergent Status Match**

| Covariate<br>(percent unless noted)            | All New<br>Surgeon<br>Patients<br>before<br>Match | Matched<br>New<br>Surgeon<br>Patients | Matched<br>Exp.<br>Surgeon<br>Patients | All Exp.<br>Surgeon<br>Patients<br>before<br>Match | Stand<br>Diff<br>before<br>Match | P<br>before<br>Match | Stand<br>Diff<br>after<br>Match | P<br>after<br>Match |
|------------------------------------------------|---------------------------------------------------|---------------------------------------|----------------------------------------|----------------------------------------------------|----------------------------------|----------------------|---------------------------------|---------------------|
| Number of Surgeons                             |                                                   |                                       |                                        |                                                    |                                  |                      |                                 |                     |
| Number of Patients                             | 8,260                                             | 8,260                                 | 8,260                                  | 131,045                                            |                                  |                      |                                 |                     |
| Year of admission (mean)                       | 2011.6                                            | 2011.6                                | 2011.6                                 | 2011.0                                             | 0.48                             | <.0001               | 0.00                            | 1.0000              |
| Principal Procedure Categories                 |                                                   |                                       |                                        |                                                    |                                  |                      |                                 |                     |
| Hip Repair                                     | 29.7                                              | 29.7                                  | 29.7                                   | 10.4                                               | 0.50                             | <.0001               | 0.00                            | 1.0000              |
| Hip Replacement                                | 50.1                                              | 50.1                                  | 50.1                                   | 35.5                                               | 0.30                             | <.0001               | 0.00                            | 1.0000              |
| Hip Replacement Revision                       | 2.0                                               | 2.0                                   | 2.0                                    | 3.5                                                | -0.09                            | <.0001               | 0.00                            | 1.0000              |
| Knee Replacement                               | 16.8                                              | 16.8                                  | 16.8                                   | 47.3                                               | -0.69                            | <.0001               | 0.00                            | 1.0000              |
| Knee Replacement Revision                      | 1.5                                               | 1.5                                   | 1.5                                    | 3.4                                                | -0.13                            | <.0001               | 0.00                            | 1.0000              |
| Emergent Admission                             | 55.3                                              | 55.3                                  | 55.3                                   | 18.2                                               | 0.83                             | <.0001               | 0.00                            | 1.0000              |
| <b>Unmatched Covariates</b>                    |                                                   |                                       |                                        |                                                    |                                  |                      |                                 |                     |
| <b>Risk Factors &amp; Patient Demographics</b> |                                                   |                                       |                                        |                                                    |                                  |                      |                                 |                     |
| Age at Admission (years, mean)                 | 81.3                                              | 81.3                                  | 80.8                                   | 77.1                                               | 0.53                             | <.0001               | 0.06                            | 0.0001              |
| Age 65-69                                      | 11.9                                              | 11.9                                  | 13.1                                   | 21.3                                               | -0.25                            | <.0001               | -0.03                           | 0.0186              |
| Age 70-74                                      | 15.0                                              | 15.0                                  | 16.1                                   | 24.0                                               | -0.23                            | <.0001               | -0.03                           | 0.0435              |
| Age 75-79                                      | 16.6                                              | 16.6                                  | 16.8                                   | 21.3                                               | -0.12                            | <.0001               | -0.01                           | 0.7072              |
| Age 80-84                                      | 19.7                                              | 19.7                                  | 19.9                                   | 16.8                                               | 0.08                             | <.0001               | -0.01                           | 0.7400              |
| Age 85+                                        | 36.9                                              | 36.9                                  | 34.0                                   | 16.6                                               | 0.47                             | <.0001               | 0.07                            | 0.0002              |
| Sex (% female)                                 | 70.9                                              | 70.9                                  | 70.5                                   | 65.9                                               | 0.11                             | <.0001               | 0.01                            | 0.5271              |
| Transfer-in                                    | 1.3                                               | 1.3                                   | 0.7                                    | 0.7                                                | 0.07                             | <.0001               | 0.07                            | <.0001              |
| Past Admission in Last 6 Months                | 21.9                                              | 21.9                                  | 20.5                                   | 14.7                                               | 0.19                             | <.0001               | 0.04                            | 0.0315              |
| Admission after 9/30/2010                      | 88.7                                              | 88.7                                  | 88.7                                   | 69.2                                               | 0.49                             | <.0001               | 0.00                            | 1.0000              |
| Admission in 2012 or 2013                      | 56.3                                              | 56.3                                  | 56.3                                   | 37.7                                               | 0.38                             | <.0001               | 0.00                            | 1.0000              |
| Probability of 30-day Death                    | 4.8                                               | 4.8                                   | 4.3                                    | 1.8                                                | 0.54                             | <.0001               | 0.08                            | <.0001              |
| Comorbidity Count (mean)                       | 4.0                                               | 4.0                                   | 3.8                                    | 3.2                                                | 0.36                             | <.0001               | 0.08                            | <.0001              |
| Same-Day Secondary Procedures                  |                                                   |                                       |                                        |                                                    |                                  |                      |                                 |                     |
| Major Operative Therapeutic                    | 6.6                                               | 6.6                                   | 5.9                                    | 7.7                                                | -0.04                            | 0.0002               | 0.03                            | 0.0709              |
| Comorbidities                                  |                                                   |                                       |                                        |                                                    |                                  |                      |                                 |                     |
| Congestive Heart Failure                       | 21.5                                              | 21.5                                  | 20.0                                   | 12.5                                               | 0.24                             | <.0001               | 0.04                            | 0.0156              |
| Past Myocardial Infarction                     | 9.4                                               | 9.4                                   | 9.0                                    | 7.1                                                | 0.08                             | <.0001               | 0.02                            | 0.3318              |
| Past Arrhythmia                                | 30.3                                              | 30.3                                  | 29.1                                   | 25.3                                               | 0.11                             | <.0001               | 0.03                            | 0.0795              |
| Angina                                         | 3.4                                               | 3.4                                   | 2.9                                    | 2.9                                                | 0.03                             | 0.0159               | 0.03                            | 0.1004              |
| Valvular Disease                               | 24.3                                              | 24.3                                  | 23.4                                   | 18.3                                               | 0.15                             | <.0001               | 0.02                            | 0.1654              |
| Unstable Angina                                | 1.3                                               | 1.3                                   | 1.1                                    | 1.0                                                | 0.03                             | 0.0067               | 0.02                            | 0.3228              |
| Hypertension                                   | 86.8                                              | 86.8                                  | 86.4                                   | 84.9                                               | 0.06                             | <.0001               | 0.01                            | 0.5373              |
| Diabetes                                       | 29.0                                              | 29.0                                  | 28.3                                   | 27.7                                               | 0.03                             | 0.0121               | 0.02                            | 0.3438              |
| Renal Dysfunction                              | 21.6                                              | 21.6                                  | 19.4                                   | 12.8                                               | 0.23                             | <.0001               | 0.06                            | 0.0006              |
| Renal Failure                                  | 4.4                                               | 4.4                                   | 4.0                                    | 2.6                                                | 0.10                             | <.0001               | 0.02                            | 0.2168              |
| Liver Disease                                  | 3.9                                               | 3.9                                   | 3.3                                    | 3.1                                                | 0.05                             | <.0001               | 0.03                            | 0.0608              |
| Cancer                                         | 26.7                                              | 26.7                                  | 25.7                                   | 25.8                                               | 0.02                             | 0.0782               | 0.02                            | 0.1468              |
| Specific Abdominal Cancer                      | 0.5                                               | 0.5                                   | 0.4                                    | 0.2                                                | 0.05                             | <.0001               | 0.03                            | 0.0999              |
| Dementia                                       | 30.8                                              | 30.8                                  | 26.7                                   | 12.2                                               | 0.47                             | <.0001               | 0.10                            | <.0001              |
| Stroke                                         | 18.1                                              | 18.1                                  | 16.4                                   | 10.3                                               | 0.22                             | <.0001               | 0.05                            | 0.0062              |
| Seizure                                        | 2.6                                               | 2.6                                   | 2.3                                    | 1.5                                                | 0.08                             | <.0001               | 0.02                            | 0.3155              |
| Paraplegia                                     | 3.1                                               | 3.1                                   | 2.8                                    | 1.3                                                | 0.12                             | <.0001               | 0.02                            | 0.2877              |
| COPD                                           | 25.8                                              | 25.8                                  | 24.7                                   | 18.5                                               | 0.18                             | <.0001               | 0.03                            | 0.1031              |
| Asthma                                         | 8.8                                               | 8.8                                   | 9.2                                    | 9.8                                                | -0.03                            | 0.0028               | -0.02                           | 0.3146              |
| Post-inflammatory Pulmonary Fibrosis           | 3.8                                               | 3.8                                   | 3.5                                    | 2.4                                                | 0.08                             | <.0001               | 0.02                            | 0.3202              |
| Hypothyroidism                                 | 27.5                                              | 27.5                                  | 27.5                                   | 25.8                                               | 0.04                             | 0.0008               | 0.00                            | 0.9861              |
| Thrombocytopenia                               | 2.7                                               | 2.7                                   | 2.3                                    | 1.7                                                | 0.07                             | <.0001               | 0.03                            | 0.1012              |
| Collagen Vascular Disease                      | 7.7                                               | 7.7                                   | 8.0                                    | 8.5                                                | -0.03                            | 0.0120               | -0.01                           | 0.4183              |
| AIDS                                           | --*                                               | --*                                   | --*                                    | 0.0                                                | 0.02                             | 0.0156               | 0.00                            | 1.0000              |
| Chronic Peptic Ulcer                           | --*                                               | --*                                   | --*                                    | 0.1                                                | 0.01                             | 0.5189               | -0.01                           | 0.6289              |
| Coagulopathy                                   | 0.3                                               | 0.3                                   | 0.5                                    | 0.5                                                | -0.03                            | 0.0287               | -0.03                           | 0.1028              |
| Other Coagulopathy                             | 4.0                                               | 4.0                                   | 4.0                                    | 3.6                                                | 0.02                             | 0.0677               | 0.00                            | 0.9682              |
| Cushing's Disease                              | --*                                               | --*                                   | --*                                    | 0.1                                                | 0.00                             | 1.0000               | -0.01                           | 1.0000              |

| <b>Covariate<br/>(percent unless noted)</b> | <b>All New<br/>Surgeon<br/>Patients<br/>before<br/>Match</b> | <b>Matched<br/>New<br/>Surgeon<br/>Patients</b> | <b>Matched<br/>Exp.<br/>Surgeon<br/>Patients</b> | <b>All Exp.<br/>Surgeon<br/>Patients<br/>before<br/>Match</b> | <b>Stand<br/>Diff<br/>before<br/>Match</b> | <b>P<br/>before<br/>Match</b> | <b>Stand<br/>Diff<br/>after<br/>Match</b> | <b>P<br/>after<br/>Match</b> |
|---------------------------------------------|--------------------------------------------------------------|-------------------------------------------------|--------------------------------------------------|---------------------------------------------------------------|--------------------------------------------|-------------------------------|-------------------------------------------|------------------------------|
| Graves' Disease                             | 0.3                                                          | 0.3                                             | 0.3                                              | 0.3                                                           | 0.01                                       | 0.6043                        | 0.01                                      | 0.5676                       |
| Hemoglobin Disorder                         | --*                                                          | --*                                             | --*                                              | 0.0                                                           | 0.01                                       | 0.3563                        | -0.03                                     | 0.2889                       |

Cells marked "--\*" are masked to comply with CMS cell size suppression rules.  
P-values calculated using group tests, with Fisher's exact test used for binary and Wilcoxon rank sum used for continuous variables.

**eTable 10. Complete Matching Tables for Risk Factor Match** Displays the covariate balance when new and experienced surgeon patients were paired on all covariates: year of admission, procedure, emergent status, and risk factors.

| Covariate<br>(percent unless noted)    | All New<br>Surgeon<br>Patients<br>before<br>Match | Matched<br>New<br>Surgeon<br>Patients | Matched<br>Exp.<br>Surgeon<br>Patients | All Exp.<br>Surgeon<br>Patients<br>before<br>Match | Stand<br>Diff<br>before<br>Match | P<br>before<br>Match | Stand<br>Diff<br>after<br>Match | P<br>after<br>Match |
|----------------------------------------|---------------------------------------------------|---------------------------------------|----------------------------------------|----------------------------------------------------|----------------------------------|----------------------|---------------------------------|---------------------|
| Number of Surgeons                     |                                                   |                                       |                                        |                                                    |                                  |                      |                                 |                     |
| Number of Patients                     | 18,200                                            | 18,200                                | 18,200                                 | 203,113                                            |                                  |                      |                                 |                     |
| Year of admission (mean)               | 2011.5                                            | 2011.5                                | 2011.4                                 | 2011.0                                             | 0.47                             | <.0001               | 0.10                            | <.0001              |
| Principal Procedure Categories         |                                                   |                                       |                                        |                                                    |                                  |                      |                                 |                     |
| General Surgery                        |                                                   |                                       |                                        |                                                    |                                  |                      |                                 |                     |
| Adrenalectomy                          | 0.3                                               | 0.3                                   | 0.3                                    | 0.3                                                | 0.00                             | 0.8358               | 0.00                            | 1.0000              |
| Appendectomy                           | 5.3                                               | 5.3                                   | 5.3                                    | 3.9                                                | 0.07                             | <.0001               | 0.00                            | 1.0000              |
| Bariatric                              | 0.5                                               | 0.5                                   | 0.5                                    | 0.6                                                | -0.01                            | 0.2398               | 0.00                            | 1.0000              |
| Biliary common duct                    | --*                                               | --*                                   | --*                                    | 0.1                                                | -0.01                            | 0.6182               | 0.00                            | 1.0000              |
| Biliary other                          | --*                                               | --*                                   | --*                                    | 0.4                                                | -0.06                            | <.0001               | 0.00                            | 1.0000              |
| Cholecystectomy                        | 29.8                                              | 29.8                                  | 29.8                                   | 25.4                                               | 0.10                             | <.0001               | 0.00                            | 1.0000              |
| Colectomy Partial – Lap                | 9.1                                               | 9.1                                   | 9.1                                    | 10.0                                               | -0.03                            | 0.0044               | 0.00                            | 1.0000              |
| Colectomy Partial – Open               | 18.0                                              | 18.0                                  | 18.0                                   | 17.7                                               | 0.01                             | 0.4414               | 0.00                            | 1.0000              |
| Colectomy Total – Lap                  | 0.3                                               | 0.3                                   | 0.3                                    | 0.2                                                | 0.02                             | 0.0570               | 0.00                            | 1.0000              |
| Colectomy Total – Open                 | 1.2                                               | 1.2                                   | 1.2                                    | 1.0                                                | 0.02                             | 0.1033               | 0.00                            | 1.0000              |
| Esophagectomy                          | --*                                               | --*                                   | --*                                    | 0.2                                                | -0.03                            | 0.0157               | 0.00                            | 1.0000              |
| Esophagomyotomy                        | --*                                               | --*                                   | --*                                    | 0.2                                                | -0.02                            | 0.0563               | 0.00                            | 1.0000              |
| Hernia Abdominal – Lap                 | 1.5                                               | 1.5                                   | 1.5                                    | 1.3                                                | 0.01                             | 0.3790               | 0.00                            | 1.0000              |
| Hernia Abdominal – Open                | 3.3                                               | 3.3                                   | 3.3                                    | 5.3                                                | -0.10                            | <.0001               | 0.00                            | 1.0000              |
| Hernia Groin – Lap                     | 0.4                                               | 0.4                                   | 0.4                                    | 0.5                                                | -0.01                            | 0.2948               | 0.00                            | 1.0000              |
| Hernia Groin – Open                    | 3.6                                               | 3.6                                   | 3.6                                    | 3.2                                                | 0.02                             | 0.0608               | 0.00                            | 1.0000              |
| Large Bowel Other                      | 0.8                                               | 0.8                                   | 0.8                                    | 0.8                                                | 0.00                             | 1.0000               | 0.00                            | 1.0000              |
| Liver Other                            | --*                                               | --*                                   | --*                                    | 0.1                                                | -0.03                            | 0.0188               | 0.00                            | 1.0000              |
| Liver Partial Hepatectomy              | 0.3                                               | 0.3                                   | 0.3                                    | 0.7                                                | -0.05                            | <.0001               | 0.00                            | 1.0000              |
| Lysis of Adhesions                     | 5.6                                               | 5.6                                   | 5.6                                    | 5.1                                                | 0.02                             | 0.0274               | 0.00                            | 1.0000              |
| Mastectomy                             | 1.4                                               | 1.4                                   | 1.4                                    | 2.6                                                | -0.09                            | <.0001               | 0.00                            | 1.0000              |
| Pancreatectomy                         | 0.7                                               | 0.7                                   | 0.7                                    | 1.8                                                | -0.09                            | <.0001               | 0.00                            | 1.0000              |
| Parathyroidectomy                      | 0.3                                               | 0.3                                   | 0.3                                    | 0.8                                                | -0.06                            | <.0001               | 0.00                            | 1.0000              |
| PD Access Procedure                    | 0.3                                               | 0.3                                   | 0.3                                    | 0.3                                                | 0.01                             | 0.4042               | 0.00                            | 1.0000              |
| Proctectomy                            | 2.9                                               | 2.9                                   | 2.9                                    | 3.1                                                | -0.01                            | 0.2904               | 0.00                            | 1.0000              |
| Proctopexy                             | 0.1                                               | 0.1                                   | 0.1                                    | 0.1                                                | 0.00                             | 0.8702               | 0.00                            | 1.0000              |
| Pyloroplasty                           | 0.2                                               | 0.2                                   | 0.2                                    | 0.1                                                | 0.01                             | 0.3695               | 0.00                            | 1.0000              |
| Small Bowel Other                      | 0.8                                               | 0.8                                   | 0.8                                    | 0.7                                                | 0.00                             | 0.6610               | 0.00                            | 1.0000              |
| Small Bowel Resection                  | 8.3                                               | 8.3                                   | 8.3                                    | 6.6                                                | 0.07                             | <.0001               | 0.00                            | 1.0000              |
| Splenectomy                            | 0.7                                               | 0.7                                   | 0.7                                    | 0.8                                                | -0.01                            | 0.2853               | 0.00                            | 1.0000              |
| Stomach Anti-Reflux                    | 0.3                                               | 0.3                                   | 0.3                                    | 1.0                                                | -0.09                            | <.0001               | 0.00                            | 1.0000              |
| Stomach Gastric Bypass (non-bariatric) | 0.3                                               | 0.3                                   | 0.3                                    | 0.5                                                | -0.03                            | 0.0090               | 0.00                            | 1.0000              |
| Stomach Other                          | 0.3                                               | 0.3                                   | 0.3                                    | 0.3                                                | -0.01                            | 0.5090               | 0.00                            | 1.0000              |
| Stomach Partial Gastrectomy            | 1.0                                               | 1.0                                   | 1.0                                    | 1.5                                                | -0.04                            | 0.0002               | 0.00                            | 1.0000              |
| Stomach Total Gastrectomy              | --*                                               | --*                                   | --*                                    | 0.4                                                | -0.07                            | <.0001               | 0.00                            | 1.0000              |
| Thyroidectomy Partial                  | 0.3                                               | 0.3                                   | 0.3                                    | 0.6                                                | -0.06                            | <.0001               | 0.00                            | 1.0000              |
| Thyroidectomy Substernal               | --*                                               | --*                                   | --*                                    | 0.1                                                | -0.01                            | 0.4359               | 0.00                            | 1.0000              |
| Thyroidectomy Total                    | 0.5                                               | 0.5                                   | 0.5                                    | 0.8                                                | -0.04                            | 0.0001               | 0.00                            | 1.0000              |
| Ulcer                                  | 1.4                                               | 1.4                                   | 1.4                                    | 1.0                                                | 0.04                             | 0.0004               | 0.00                            | 1.0000              |
| Orthopedic Surgery                     |                                                   |                                       |                                        |                                                    |                                  |                      |                                 |                     |
| Hip Repair                             | 29.7                                              | 29.7                                  | 29.7                                   | 10.4                                               | 0.50                             | <.0001               | 0.00                            | 1.0000              |
| Hip Replacement                        | 50.1                                              | 50.1                                  | 50.1                                   | 35.5                                               | 0.30                             | <.0001               | 0.00                            | 1.0000              |
| Hip Replacement Revision               | 2.0                                               | 2.0                                   | 2.0                                    | 3.5                                                | -0.09                            | <.0001               | 0.00                            | 1.0000              |
| Knee Replacement                       | 16.8                                              | 16.8                                  | 16.8                                   | 47.3                                               | -0.69                            | <.0001               | 0.00                            | 1.0000              |
| Knee Replacement Revision              | 1.5                                               | 1.5                                   | 1.5                                    | 3.4                                                | -0.13                            | <.0001               | 0.00                            | 1.0000              |
| Emergent Admission                     | 53.9                                              | 53.9                                  | 53.9                                   | 25.8                                               | 0.60                             | <.0001               | 0.00                            | 1.0000              |
| Risk Factors & Patient Demographics    |                                                   |                                       |                                        |                                                    |                                  |                      |                                 |                     |
| Age at Admission (years, mean)         | 79.0                                              | 79.0                                  | 79.1                                   | 77.0                                               | 0.25                             | <.0001               | -0.02                           | 0.0447              |

| Covariate<br>(percent unless noted)          | All New<br>Surgeon<br>Patients<br>before<br>Match | Matched<br>New<br>Surgeon<br>Patients | Matched<br>Exp.<br>Surgeon<br>Patients | All Exp.<br>Surgeon<br>Patients<br>before<br>Match | Stand<br>Diff<br>before<br>Match | P<br>before<br>Match | Stand<br>Diff<br>after<br>Match | P<br>after<br>Match |
|----------------------------------------------|---------------------------------------------------|---------------------------------------|----------------------------------------|----------------------------------------------------|----------------------------------|----------------------|---------------------------------|---------------------|
| Age 65-69                                    | 17.2                                              | 17.2                                  | 16.9                                   | 21.6                                               | -0.11                            | <.0001               | 0.01                            | 0.5489              |
| Age 70-74                                    | 19.7                                              | 19.7                                  | 19.1                                   | 23.9                                               | -0.10                            | <.0001               | 0.01                            | 0.1896              |
| Age 75-79                                    | 18.7                                              | 18.7                                  | 18.8                                   | 21.2                                               | -0.06                            | <.0001               | 0.00                            | 0.8193              |
| Age 80-84                                    | 18.7                                              | 18.7                                  | 18.5                                   | 17.0                                               | 0.04                             | <.0001               | 0.01                            | 0.5715              |
| Age 85+                                      | 25.8                                              | 25.8                                  | 26.7                                   | 16.3                                               | 0.24                             | <.0001               | -0.02                           | 0.0453              |
| Sex (% female)                               | 63.0                                              | 63.0                                  | 63.1                                   | 62.8                                               | 0.00                             | 0.5862               | 0.00                            | 0.8620              |
| Transfer-in                                  | 2.5                                               | 2.5                                   | 2.5                                    | 1.5                                                | 0.08                             | <.0001               | 0.00                            | 0.9734              |
| Past Admission in Last 6 Months              | 25.6                                              | 25.6                                  | 24.1                                   | 19.3                                               | 0.15                             | <.0001               | 0.04                            | 0.0008              |
| Admission after 9/30/2010                    | 87.4                                              | 87.4                                  | 87.4                                   | 68.5                                               | 0.47                             | <.0001               | 0.00                            | 1.0000              |
| Admission in 2012 or 2013                    | 54.9                                              | 54.9                                  | 49.7                                   | 36.6                                               | 0.37                             | <.0001               | 0.11                            | <.0001              |
| Probability of 30-day Death                  | 5.6                                               | 5.6                                   | 5.5                                    | 3.0                                                | 0.35                             | <.0001               | 0.01                            | 0.3718              |
| Comorbidity Count (mean)                     | 4.1                                               | 4.1                                   | 4.0                                    | 3.5                                                | 0.26                             | <.0001               | 0.04                            | 0.0079              |
| Same-Day Secondary Procedures                |                                                   |                                       |                                        |                                                    |                                  |                      |                                 |                     |
| Major Operative Therapeutic<br>Comorbidities | 26.7                                              | 26.7                                  | 25.7                                   | 19.7                                               | 0.17                             | <.0001               | 0.03                            | 0.0207              |
| Congestive Heart Failure                     | 22.2                                              | 22.2                                  | 21.4                                   | 15.2                                               | 0.18                             | <.0001               | 0.02                            | 0.0821              |
| Past Myocardial Infarction                   | 10.4                                              | 10.4                                  | 9.1                                    | 8.3                                                | 0.07                             | <.0001               | 0.04                            | 0.0001              |
| Past Arrhythmia                              | 30.5                                              | 30.5                                  | 29.8                                   | 26.9                                               | 0.08                             | <.0001               | 0.02                            | 0.1123              |
| Angina                                       | 4.0                                               | 4.0                                   | 2.9                                    | 3.5                                                | 0.02                             | 0.0012               | 0.06                            | <.0001              |
| Valvular Disease                             | 23.9                                              | 23.9                                  | 22.9                                   | 19.6                                               | 0.10                             | <.0001               | 0.02                            | 0.0220              |
| Unstable Angina                              | 1.8                                               | 1.8                                   | 1.4                                    | 1.5                                                | 0.02                             | 0.0015               | 0.04                            | 0.0008              |
| Hypertension                                 | 86.0                                              | 86.0                                  | 86.0                                   | 84.7                                               | 0.04                             | <.0001               | 0.00                            | 0.9157              |
| Diabetes                                     | 32.5                                              | 32.5                                  | 32.9                                   | 30.1                                               | 0.05                             | <.0001               | -0.01                           | 0.3836              |
| Renal Dysfunction                            | 25.2                                              | 25.2                                  | 24.8                                   | 16.4                                               | 0.22                             | <.0001               | 0.01                            | 0.4172              |
| Renal Failure                                | 5.6                                               | 5.6                                   | 5.0                                    | 3.7                                                | 0.09                             | <.0001               | 0.03                            | 0.0114              |
| Liver Disease                                | 10.7                                              | 10.7                                  | 10.2                                   | 7.8                                                | 0.10                             | <.0001               | 0.02                            | 0.1502              |
| Cancer                                       | 36.0                                              | 36.0                                  | 37.9                                   | 34.4                                               | 0.03                             | <.0001               | -0.04                           | 0.0003              |
| Specific Abdominal Cancer                    | 1.9                                               | 1.9                                   | 2.3                                    | 2.0                                                | -0.01                            | 0.4093               | -0.02                           | 0.0236              |
| Dementia                                     | 21.2                                              | 21.2                                  | 20.5                                   | 11.7                                               | 0.26                             | <.0001               | 0.02                            | 0.1098              |
| Stroke                                       | 15.9                                              | 15.9                                  | 14.4                                   | 11.0                                               | 0.14                             | <.0001               | 0.04                            | 0.0001              |
| Seizure                                      | 2.3                                               | 2.3                                   | 1.6                                    | 1.6                                                | 0.05                             | <.0001               | 0.06                            | <.0001              |
| Paraplegia                                   | 2.9                                               | 2.9                                   | 2.0                                    | 1.7                                                | 0.08                             | <.0001               | 0.06                            | <.0001              |
| COPD                                         | 27.3                                              | 27.3                                  | 26.4                                   | 21.7                                               | 0.13                             | <.0001               | 0.02                            | 0.0555              |
| Asthma                                       | 9.1                                               | 9.1                                   | 9.3                                    | 9.8                                                | -0.02                            | 0.0021               | -0.01                           | 0.4686              |
| Post-inflammatory Pulmonary Fibrosis         | 3.9                                               | 3.9                                   | 3.9                                    | 2.8                                                | 0.06                             | <.0001               | 0.00                            | 0.9783              |
| Hypothyroidism                               | 25.2                                              | 25.2                                  | 24.6                                   | 25.0                                               | 0.01                             | 0.4475               | 0.01                            | 0.1670              |
| Thrombocytopenia                             | 2.9                                               | 2.9                                   | 3.1                                    | 2.3                                                | 0.04                             | <.0001               | -0.01                           | 0.4981              |
| Collagen Vascular Disease                    | 6.8                                               | 6.8                                   | 6.1                                    | 7.7                                                | -0.04                            | <.0001               | 0.03                            | 0.0082              |
| AIDS                                         | 0.1                                               | 0.1                                   | 0.1                                    | 0.1                                                | 0.01                             | 0.0569               | 0.00                            | 1.0000              |
| Chronic Peptic Ulcer                         | 0.2                                               | 0.2                                   | 0.2                                    | 0.2                                                | 0.01                             | 0.2543               | -0.01                           | 0.7307              |
| Coagulopathy                                 | 0.4                                               | 0.4                                   | 0.5                                    | 0.5                                                | -0.01                            | 0.1639               | -0.02                           | 0.1724              |
| Other Coagulopathy                           | 4.5                                               | 4.5                                   | 4.5                                    | 3.9                                                | 0.03                             | 0.0002               | 0.00                            | 0.9797              |
| Cushing's Disease                            | 0.1                                               | 0.1                                   | 0.1                                    | 0.1                                                | 0.00                             | 0.7697               | -0.01                           | 0.6899              |
| Graves' Disease                              | 0.4                                               | 0.4                                   | 0.3                                    | 0.3                                                | 0.00                             | 0.7414               | 0.01                            | 0.4106              |
| Hemoglobin Disorder                          | --*                                               | --*                                   | --*                                    | 0.0                                                | 0.00                             | 1.0000               | -0.03                           | 0.1459              |

Cells marked "--\*" are masked to comply with CMS cell size suppression rules.

P-values calculated using group tests, with Fisher's exact test used for binary and Wilcoxon rank sum used for continuous variables.

**eTable 10a. General Surgery Risk Factor Match**

| Covariate<br>(percent unless noted)    | All New<br>Surgeon<br>Patients<br>before<br>Match | Matched<br>New<br>Surgeon<br>Patients | Matched<br>Exp.<br>Surgeon<br>Patients | All Exp.<br>Surgeon<br>Patients<br>before<br>Match | Stand<br>Diff<br>before<br>Match | P<br>before<br>Match | Stand<br>Diff<br>after<br>Match | P<br>after<br>Match |
|----------------------------------------|---------------------------------------------------|---------------------------------------|----------------------------------------|----------------------------------------------------|----------------------------------|----------------------|---------------------------------|---------------------|
| Number of Surgeons                     |                                                   |                                       |                                        |                                                    |                                  |                      |                                 |                     |
| Number of Patients                     | 9,940                                             | 9,940                                 | 9,940                                  | 72,068                                             |                                  |                      |                                 |                     |
| Year of admission (mean)               | 2011.5                                            | 2011.5                                | 2011.3                                 | 2010.9                                             | 0.48                             | <.0001               | 0.12                            | <.0001              |
| Principal Procedure Categories         |                                                   |                                       |                                        |                                                    |                                  |                      |                                 |                     |
| Adrenalectomy                          | 0.3                                               | 0.3                                   | 0.3                                    | 0.3                                                | 0.00                             | 0.8358               | 0.00                            | 1.0000              |
| Appendectomy                           | 5.3                                               | 5.3                                   | 5.3                                    | 3.9                                                | 0.07                             | <.0001               | 0.00                            | 1.0000              |
| Bariatric                              | 0.5                                               | 0.5                                   | 0.5                                    | 0.6                                                | -0.01                            | 0.2398               | 0.00                            | 1.0000              |
| Biliary common duct                    | --*                                               | --*                                   | --*                                    | 0.1                                                | -0.01                            | 0.6182               | 0.00                            | 1.0000              |
| Biliary other                          | --*                                               | --*                                   | --*                                    | 0.4                                                | -0.06                            | <.0001               | 0.00                            | 1.0000              |
| Cholecystectomy                        | 29.8                                              | 29.8                                  | 29.8                                   | 25.4                                               | 0.10                             | <.0001               | 0.00                            | 1.0000              |
| Colectomy Partial – Lap                | 9.1                                               | 9.1                                   | 9.1                                    | 10.0                                               | -0.03                            | 0.0044               | 0.00                            | 1.0000              |
| Colectomy Partial – Open               | 18.0                                              | 18.0                                  | 18.0                                   | 17.7                                               | 0.01                             | 0.4414               | 0.00                            | 1.0000              |
| Colectomy Total – Lap                  | 0.3                                               | 0.3                                   | 0.3                                    | 0.2                                                | 0.02                             | 0.0570               | 0.00                            | 1.0000              |
| Colectomy Total – Open                 | 1.2                                               | 1.2                                   | 1.2                                    | 1.0                                                | 0.02                             | 0.1033               | 0.00                            | 1.0000              |
| Esophagectomy                          | --*                                               | --*                                   | --*                                    | 0.2                                                | -0.03                            | 0.0157               | 0.00                            | 1.0000              |
| Esophagomyotomy                        | --*                                               | --*                                   | --*                                    | 0.2                                                | -0.02                            | 0.0563               | 0.00                            | 1.0000              |
| Hernia Abdominal – Lap                 | 1.5                                               | 1.5                                   | 1.5                                    | 1.3                                                | 0.01                             | 0.3790               | 0.00                            | 1.0000              |
| Hernia Abdominal – Open                | 3.3                                               | 3.3                                   | 3.3                                    | 5.3                                                | -0.10                            | <.0001               | 0.00                            | 1.0000              |
| Hernia Groin – Lap                     | 0.4                                               | 0.4                                   | 0.4                                    | 0.5                                                | -0.01                            | 0.2948               | 0.00                            | 1.0000              |
| Hernia Groin – Open                    | 3.6                                               | 3.6                                   | 3.6                                    | 3.2                                                | 0.02                             | 0.0608               | 0.00                            | 1.0000              |
| Large Bowel Other                      | 0.8                                               | 0.8                                   | 0.8                                    | 0.8                                                | 0.00                             | 1.0000               | 0.00                            | 1.0000              |
| Liver Other                            | --*                                               | --*                                   | --*                                    | 0.1                                                | -0.03                            | 0.0188               | 0.00                            | 1.0000              |
| Liver Partial Hepatectomy              | 0.3                                               | 0.3                                   | 0.3                                    | 0.7                                                | -0.05                            | <.0001               | 0.00                            | 1.0000              |
| Lysis of Adhesions                     | 5.6                                               | 5.6                                   | 5.6                                    | 5.1                                                | 0.02                             | 0.0274               | 0.00                            | 1.0000              |
| Mastectomy                             | 1.4                                               | 1.4                                   | 1.4                                    | 2.6                                                | -0.09                            | <.0001               | 0.00                            | 1.0000              |
| Pancreatectomy                         | 0.7                                               | 0.7                                   | 0.7                                    | 1.8                                                | -0.09                            | <.0001               | 0.00                            | 1.0000              |
| Parathyroidectomy                      | 0.3                                               | 0.3                                   | 0.3                                    | 0.8                                                | -0.06                            | <.0001               | 0.00                            | 1.0000              |
| PD Access Procedure                    | 0.3                                               | 0.3                                   | 0.3                                    | 0.3                                                | 0.01                             | 0.4042               | 0.00                            | 1.0000              |
| Proctectomy                            | 2.9                                               | 2.9                                   | 2.9                                    | 3.1                                                | -0.01                            | 0.2904               | 0.00                            | 1.0000              |
| Proctopexy                             | 0.1                                               | 0.1                                   | 0.1                                    | 0.1                                                | 0.00                             | 0.8702               | 0.00                            | 1.0000              |
| Pyloroplasty                           | 0.2                                               | 0.2                                   | 0.2                                    | 0.1                                                | 0.01                             | 0.3695               | 0.00                            | 1.0000              |
| Small Bowel Other                      | 0.8                                               | 0.8                                   | 0.8                                    | 0.7                                                | 0.00                             | 0.6610               | 0.00                            | 1.0000              |
| Small Bowel Resection                  | 8.3                                               | 8.3                                   | 8.3                                    | 6.6                                                | 0.07                             | <.0001               | 0.00                            | 1.0000              |
| Splenectomy                            | 0.7                                               | 0.7                                   | 0.7                                    | 0.8                                                | -0.01                            | 0.2853               | 0.00                            | 1.0000              |
| Stomach Anti-Reflux                    | 0.3                                               | 0.3                                   | 0.3                                    | 1.0                                                | -0.09                            | <.0001               | 0.00                            | 1.0000              |
| Stomach Gastric Bypass (non-bariatric) | 0.3                                               | 0.3                                   | 0.3                                    | 0.5                                                | -0.03                            | 0.0090               | 0.00                            | 1.0000              |
| Stomach Other                          | 0.3                                               | 0.3                                   | 0.3                                    | 0.3                                                | -0.01                            | 0.5090               | 0.00                            | 1.0000              |
| Stomach Partial Gastrectomy            | 1.0                                               | 1.0                                   | 1.0                                    | 1.5                                                | -0.04                            | 0.0002               | 0.00                            | 1.0000              |
| Stomach Total Gastrectomy              | --*                                               | --*                                   | --*                                    | 0.4                                                | -0.07                            | <.0001               | 0.00                            | 1.0000              |
| Thyroidectomy Partial                  | 0.3                                               | 0.3                                   | 0.3                                    | 0.6                                                | -0.06                            | <.0001               | 0.00                            | 1.0000              |
| Thyroidectomy Substernal               | --*                                               | --*                                   | --*                                    | 0.1                                                | -0.01                            | 0.4359               | 0.00                            | 1.0000              |
| Thyroidectomy Total                    | 0.5                                               | 0.5                                   | 0.5                                    | 0.8                                                | -0.04                            | 0.0001               | 0.00                            | 1.0000              |
| Ulcer                                  | 1.4                                               | 1.4                                   | 1.4                                    | 1.0                                                | 0.04                             | 0.0004               | 0.00                            | 1.0000              |
| Emergent Admission                     | 52.7                                              | 52.7                                  | 52.7                                   | 39.7                                               | 0.26                             | <.0001               | 0.00                            | 1.0000              |
| Risk Factors & Patient Demographics    |                                                   |                                       |                                        |                                                    |                                  |                      |                                 |                     |
| Age at Admission (years, mean)         | 77.0                                              | 77.0                                  | 77.0                                   | 76.8                                               | 0.03                             | 0.0131               | 0.00                            | 0.8794              |
| Age 65-69                              | 21.6                                              | 21.6                                  | 21.7                                   | 22.3                                               | -0.02                            | 0.1161               | 0.00                            | 0.7961              |
| Age 70-74                              | 23.6                                              | 23.6                                  | 23.2                                   | 23.7                                               | 0.00                             | 0.8503               | 0.01                            | 0.4923              |
| Age 75-79                              | 20.4                                              | 20.4                                  | 20.9                                   | 21.1                                               | -0.02                            | 0.1448               | -0.01                           | 0.4203              |
| Age 80-84                              | 17.9                                              | 17.9                                  | 17.9                                   | 17.4                                               | 0.01                             | 0.2200               | 0.00                            | 1.0000              |
| Age 85+                                | 16.5                                              | 16.5                                  | 16.3                                   | 15.6                                               | 0.03                             | 0.0172               | 0.01                            | 0.7161              |
| Sex (% female)                         | 56.5                                              | 56.5                                  | 56.8                                   | 57.2                                               | -0.01                            | 0.1946               | -0.01                           | 0.6470              |
| Transfer-in                            | 3.5                                               | 3.5                                   | 3.5                                    | 2.9                                                | 0.04                             | 0.0007               | 0.00                            | 0.9693              |
| Past Admission in Last 6 Months        | 28.7                                              | 28.7                                  | 27.2                                   | 27.7                                               | 0.02                             | 0.0346               | 0.03                            | 0.0194              |
| Admission after 9/30/2010              | 86.3                                              | 86.3                                  | 86.3                                   | 67.3                                               | 0.46                             | <.0001               | 0.00                            | 1.0000              |
| Admission in 2012 or 2013              | 53.8                                              | 53.8                                  | 46.9                                   | 34.7                                               | 0.39                             | <.0001               | 0.14                            | <.0001              |

| Covariate<br>(percent unless noted)          | All New<br>Surgeon<br>Patients<br>before<br>Match | Matched<br>New<br>Surgeon<br>Patients | Matched<br>Exp.<br>Surgeon<br>Patients | All Exp.<br>Surgeon<br>Patients<br>before<br>Match | Stand<br>Diff<br>before<br>Match | P<br>before<br>Match | Stand<br>Diff<br>after<br>Match | P<br>after<br>Match |
|----------------------------------------------|---------------------------------------------------|---------------------------------------|----------------------------------------|----------------------------------------------------|----------------------------------|----------------------|---------------------------------|---------------------|
| Probability of 30-day Death                  | 6.2                                               | 6.2                                   | 6.0                                    | 5.2                                                | 0.12                             | <.0001               | 0.03                            | 0.0484              |
| Comorbidity Count (mean)                     | 4.3                                               | 4.3                                   | 4.2                                    | 4.2                                                | 0.04                             | 0.0002               | 0.04                            | 0.0344              |
| Same-Day Secondary Procedures                |                                                   |                                       |                                        |                                                    |                                  |                      |                                 |                     |
| Major Operative Therapeutic<br>Comorbidities | 43.5                                              | 43.5                                  | 42.0                                   | 41.4                                               | 0.04                             | 0.0001               | 0.03                            | 0.0404              |
| Congestive Heart Failure                     | 22.8                                              | 22.8                                  | 21.1                                   | 20.0                                               | 0.07                             | <.0001               | 0.04                            | 0.0038              |
| Past Myocardial Infarction                   | 11.2                                              | 11.2                                  | 9.6                                    | 10.5                                               | 0.02                             | 0.0196               | 0.05                            | 0.0001              |
| Past Arrhythmia                              | 30.7                                              | 30.7                                  | 29.4                                   | 29.9                                               | 0.02                             | 0.1383               | 0.03                            | 0.0531              |
| Angina                                       | 4.4                                               | 4.4                                   | 3.1                                    | 4.5                                                | 0.00                             | 0.7182               | 0.06                            | <.0001              |
| Valvular Disease                             | 23.5                                              | 23.5                                  | 21.7                                   | 22.1                                               | 0.03                             | 0.0011               | 0.04                            | 0.0022              |
| Unstable Angina                              | 2.3                                               | 2.3                                   | 1.8                                    | 2.5                                                | -0.01                            | 0.2117               | 0.03                            | 0.0450              |
| Hypertension                                 | 85.3                                              | 85.3                                  | 85.1                                   | 84.4                                               | 0.03                             | 0.0141               | 0.01                            | 0.7040              |
| Diabetes                                     | 35.4                                              | 35.4                                  | 35.7                                   | 34.5                                               | 0.02                             | 0.0559               | 0.00                            | 0.7670              |
| Renal Dysfunction                            | 28.2                                              | 28.2                                  | 27.2                                   | 22.9                                               | 0.12                             | <.0001               | 0.02                            | 0.1202              |
| Renal Failure                                | 6.5                                               | 6.5                                   | 5.8                                    | 5.8                                                | 0.03                             | 0.0052               | 0.03                            | 0.0312              |
| Liver Disease                                | 16.3                                              | 16.3                                  | 16.1                                   | 16.3                                               | 0.00                             | 0.9769               | 0.01                            | 0.6032              |
| Cancer                                       | 43.7                                              | 43.7                                  | 46.8                                   | 50.0                                               | -0.13                            | <.0001               | -0.06                           | <.0001              |
| Specific Abdominal Cancer                    | 3.1                                               | 3.1                                   | 3.8                                    | 5.3                                                | -0.11                            | <.0001               | -0.03                           | 0.0052              |
| Dementia                                     | 13.3                                              | 13.3                                  | 11.6                                   | 10.8                                               | 0.08                             | <.0001               | 0.05                            | 0.0005              |
| Stroke                                       | 14.0                                              | 14.0                                  | 12.1                                   | 12.4                                               | 0.05                             | <.0001               | 0.06                            | 0.0001              |
| Seizure                                      | 2.1                                               | 2.1                                   | 1.4                                    | 1.9                                                | 0.02                             | 0.0767               | 0.05                            | 0.0001              |
| Paraplegia                                   | 2.7                                               | 2.7                                   | 1.7                                    | 2.3                                                | 0.03                             | 0.0128               | 0.06                            | <.0001              |
| COPD                                         | 28.6                                              | 28.6                                  | 27.6                                   | 27.6                                               | 0.02                             | 0.0295               | 0.02                            | 0.1259              |
| Asthma                                       | 9.4                                               | 9.4                                   | 9.9                                    | 9.9                                                | -0.02                            | 0.1263               | -0.02                           | 0.2483              |
| Post-inflammatory Pulmonary Fibrosis         | 3.9                                               | 3.9                                   | 3.7                                    | 3.7                                                | 0.01                             | 0.2327               | 0.01                            | 0.4806              |
| Hypothyroidism                               | 23.3                                              | 23.3                                  | 24.8                                   | 23.4                                               | 0.00                             | 0.8596               | -0.03                           | 0.0169              |
| Thrombocytopenia                             | 3.1                                               | 3.1                                   | 3.6                                    | 3.2                                                | -0.01                            | 0.5041               | -0.03                           | 0.0687              |
| Collagen Vascular Disease                    | 6.1                                               | 6.1                                   | 6.4                                    | 6.3                                                | -0.01                            | 0.2906               | -0.01                           | 0.3328              |
| AIDS                                         | --*                                               | --*                                   | --*                                    | 0.1                                                | 0.00                             | 1.0000               | 0.00                            | 1.0000              |
| Chronic Peptic Ulcer                         | 0.3                                               | 0.3                                   | 0.3                                    | 0.3                                                | -0.01                            | 0.5748               | -0.01                           | 0.7978              |
| Coagulopathy                                 | 0.4                                               | 0.4                                   | 0.5                                    | 0.4                                                | 0.00                             | 0.8702               | -0.01                           | 0.4741              |
| Other Coagulopathy                           | 4.9                                               | 4.9                                   | 5.1                                    | 4.5                                                | 0.02                             | 0.0796               | -0.01                           | 0.5348              |
| Cushing's Disease                            | --*                                               | --*                                   | 0.1                                    | 0.1                                                | -0.01                            | 0.3436               | -0.01                           | 0.6474              |
| Graves' Disease                              | 0.4                                               | 0.4                                   | 0.4                                    | 0.4                                                | -0.01                            | 0.6195               | 0.00                            | 1.0000              |
| Hemoglobin Disorder                          | --*                                               | --*                                   | --*                                    | 0.0                                                | -0.01                            | 0.5015               | -0.01                           | 0.6250              |

Cells marked "--\*" are masked to comply with CMS cell size suppression rules.

P-values calculated using group tests, with Fisher's exact test used for binary and Wilcoxon rank sum used for continuous variables.



**eTable 10b. Orthopedic Surgery Risk-Factor Match**

| Covariate<br>(percent unless noted)          | All New<br>Surgeon<br>Patients<br>before<br>Match | Matched<br>New<br>Surgeon<br>Patients | Matched<br>Exp.<br>Surgeon<br>Patients | All Exp.<br>Surgeon<br>Patients<br>before<br>Match | Stand<br>Diff<br>before<br>Match | P<br>before<br>Match | Stand<br>Diff<br>after<br>Match | P<br>after<br>Match |
|----------------------------------------------|---------------------------------------------------|---------------------------------------|----------------------------------------|----------------------------------------------------|----------------------------------|----------------------|---------------------------------|---------------------|
| Number of Surgeons                           |                                                   |                                       |                                        |                                                    |                                  |                      |                                 |                     |
| Number of Patients                           | 8,260                                             | 8,260                                 | 8,260                                  | 131,045                                            |                                  |                      |                                 |                     |
| Year of admission (mean)                     | 2011.6                                            | 2011.6                                | 2011.5                                 | 2011.0                                             | 0.48                             | <.0001               | 0.08                            | <.0001              |
| Principal Procedure Categories               |                                                   |                                       |                                        |                                                    |                                  |                      |                                 |                     |
| Hip Repair                                   | 29.7                                              | 29.7                                  | 29.7                                   | 10.4                                               | 0.50                             | <.0001               | 0.00                            | 1.0000              |
| Hip Replacement                              | 50.1                                              | 50.1                                  | 50.1                                   | 35.5                                               | 0.30                             | <.0001               | 0.00                            | 1.0000              |
| Hip Replacement Revision                     | 2.0                                               | 2.0                                   | 2.0                                    | 3.5                                                | -0.09                            | <.0001               | 0.00                            | 1.0000              |
| Knee Replacement                             | 16.8                                              | 16.8                                  | 16.8                                   | 47.3                                               | -0.69                            | <.0001               | 0.00                            | 1.0000              |
| Knee Replacement Revision                    | 1.5                                               | 1.5                                   | 1.5                                    | 3.4                                                | -0.13                            | <.0001               | 0.00                            | 1.0000              |
| Emergent Admission                           | 55.3                                              | 55.3                                  | 55.3                                   | 18.2                                               | 0.83                             | <.0001               | 0.00                            | 1.0000              |
| Risk Factors & Patient Demographics          |                                                   |                                       |                                        |                                                    |                                  |                      |                                 |                     |
| Age at Admission (years, mean)               | 81.3                                              | 81.3                                  | 81.7                                   | 77.1                                               | 0.53                             | <.0001               | -0.05                           | 0.0041              |
| Age 65-69                                    | 11.9                                              | 11.9                                  | 11.2                                   | 21.3                                               | -0.25                            | <.0001               | 0.02                            | 0.1506              |
| Age 70-74                                    | 15.0                                              | 15.0                                  | 14.3                                   | 24.0                                               | -0.23                            | <.0001               | 0.02                            | 0.2093              |
| Age 75-79                                    | 16.6                                              | 16.6                                  | 16.2                                   | 21.3                                               | -0.12                            | <.0001               | 0.01                            | 0.5563              |
| Age 80-84                                    | 19.7                                              | 19.7                                  | 19.2                                   | 16.8                                               | 0.08                             | <.0001               | 0.01                            | 0.4203              |
| Age 85+                                      | 36.9                                              | 36.9                                  | 39.2                                   | 16.6                                               | 0.47                             | <.0001               | -0.05                           | 0.0026              |
| Sex (% female)                               | 70.9                                              | 70.9                                  | 70.7                                   | 65.9                                               | 0.11                             | <.0001               | 0.00                            | 0.7974              |
| Transfer-in                                  | 1.3                                               | 1.3                                   | 1.3                                    | 0.7                                                | 0.07                             | <.0001               | 0.00                            | 1.0000              |
| Past Admission in Last 6 Months              | 21.9                                              | 21.9                                  | 20.4                                   | 14.7                                               | 0.19                             | <.0001               | 0.04                            | 0.0147              |
| Admission after 9/30/2010                    | 88.7                                              | 88.7                                  | 88.7                                   | 69.2                                               | 0.49                             | <.0001               | 0.00                            | 1.0000              |
| Admission in 2012 or 2013                    | 56.3                                              | 56.3                                  | 53.1                                   | 37.7                                               | 0.38                             | <.0001               | 0.06                            | <.0001              |
| Probability of 30-day Death                  | 4.8                                               | 4.8                                   | 4.9                                    | 1.8                                                | 0.54                             | <.0001               | -0.03                           | 0.2610              |
| Comorbidity Count (mean)                     | 4.0                                               | 4.0                                   | 3.9                                    | 3.2                                                | 0.36                             | <.0001               | 0.04                            | 0.1025              |
| Same-Day Secondary Procedures                |                                                   |                                       |                                        |                                                    |                                  |                      |                                 |                     |
| Major Operative Therapeutic<br>Comorbidities | 6.6                                               | 6.6                                   | 5.9                                    | 7.7                                                | -0.04                            | 0.0002               | 0.02                            | 0.1078              |
| Congestive Heart Failure                     | 21.5                                              | 21.5                                  | 21.9                                   | 12.5                                               | 0.24                             | <.0001               | -0.01                           | 0.5585              |
| Past Myocardial Infarction                   | 9.4                                               | 9.4                                   | 8.6                                    | 7.1                                                | 0.08                             | <.0001               | 0.03                            | 0.0921              |
| Past Arrhythmia                              | 30.3                                              | 30.3                                  | 30.2                                   | 25.3                                               | 0.11                             | <.0001               | 0.00                            | 0.8257              |
| Angina                                       | 3.4                                               | 3.4                                   | 2.7                                    | 2.9                                                | 0.03                             | 0.0159               | 0.04                            | 0.0086              |
| Valvular Disease                             | 24.3                                              | 24.3                                  | 24.3                                   | 18.3                                               | 0.15                             | <.0001               | 0.00                            | 0.9566              |
| Unstable Angina                              | 1.3                                               | 1.3                                   | 0.8                                    | 1.0                                                | 0.03                             | 0.0067               | 0.05                            | 0.0032              |
| Hypertension                                 | 86.8                                              | 86.8                                  | 87.1                                   | 84.9                                               | 0.06                             | <.0001               | -0.01                           | 0.5329              |
| Diabetes                                     | 29.0                                              | 29.0                                  | 29.7                                   | 27.7                                               | 0.03                             | 0.0121               | -0.02                           | 0.3300              |
| Renal Dysfunction                            | 21.6                                              | 21.6                                  | 21.9                                   | 12.8                                               | 0.23                             | <.0001               | -0.01                           | 0.5715              |
| Renal Failure                                | 4.4                                               | 4.4                                   | 4.0                                    | 2.6                                                | 0.10                             | <.0001               | 0.02                            | 0.1888              |
| Liver Disease                                | 3.9                                               | 3.9                                   | 3.2                                    | 3.1                                                | 0.05                             | <.0001               | 0.04                            | 0.0185              |
| Cancer                                       | 26.7                                              | 26.7                                  | 27.1                                   | 25.8                                               | 0.02                             | 0.0782               | -0.01                           | 0.5509              |
| Specific Abdominal Cancer                    | 0.5                                               | 0.5                                   | 0.4                                    | 0.2                                                | 0.05                             | <.0001               | 0.02                            | 0.3070              |
| Dementia                                     | 30.8                                              | 30.8                                  | 31.3                                   | 12.2                                               | 0.47                             | <.0001               | -0.01                           | 0.5449              |
| Stroke                                       | 18.1                                              | 18.1                                  | 17.2                                   | 10.3                                               | 0.22                             | <.0001               | 0.03                            | 0.1306              |
| Seizure                                      | 2.6                                               | 2.6                                   | 1.8                                    | 1.5                                                | 0.08                             | <.0001               | 0.06                            | 0.0005              |
| Paraplegia                                   | 3.1                                               | 3.1                                   | 2.4                                    | 1.3                                                | 0.12                             | <.0001               | 0.04                            | 0.0132              |
| COPD                                         | 25.8                                              | 25.8                                  | 25.0                                   | 18.5                                               | 0.18                             | <.0001               | 0.02                            | 0.2527              |
| Asthma                                       | 8.8                                               | 8.8                                   | 8.7                                    | 9.8                                                | -0.03                            | 0.0028               | 0.00                            | 0.8470              |
| Post-inflammatory Pulmonary Fibrosis         | 3.8                                               | 3.8                                   | 4.0                                    | 2.4                                                | 0.08                             | <.0001               | -0.01                           | 0.4957              |
| Hypothyroidism                               | 27.5                                              | 27.5                                  | 24.3                                   | 25.8                                               | 0.04                             | 0.0008               | 0.07                            | <.0001              |
| Thrombocytopenia                             | 2.7                                               | 2.7                                   | 2.4                                    | 1.7                                                | 0.07                             | <.0001               | 0.02                            | 0.2589              |
| Collagen Vascular Disease                    | 7.7                                               | 7.7                                   | 5.8                                    | 8.5                                                | -0.03                            | 0.0120               | 0.07                            | <.0001              |
| AIDS                                         | --*                                               | --*                                   | --*                                    | 0.0                                                | 0.02                             | 0.0156               | 0.00                            | 1.0000              |
| Chronic Peptic Ulcer                         | --*                                               | --*                                   | --*                                    | 0.1                                                | 0.01                             | 0.5189               | 0.00                            | 1.0000              |
| Coagulopathy                                 | 0.3                                               | 0.3                                   | 0.4                                    | 0.5                                                | -0.03                            | 0.0287               | -0.02                           | 0.2442              |
| Other Coagulopathy                           | 4.0                                               | 4.0                                   | 3.8                                    | 3.6                                                | 0.02                             | 0.0677               | 0.01                            | 0.4925              |
| Cushing's Disease                            | --*                                               | --*                                   | --*                                    | 0.1                                                | 0.00                             | 1.0000               | 0.00                            | 1.0000              |
| Graves' Disease                              | 0.3                                               | 0.3                                   | 0.2                                    | 0.3                                                | 0.01                             | 0.6043               | 0.02                            | 0.2321              |

| <b>Covariate<br/>(percent unless noted)</b> | <b>All New<br/>Surgeon<br/>Patients<br/>before<br/>Match</b> | <b>Matched<br/>New<br/>Surgeon<br/>Patients</b> | <b>Matched<br/>Exp.<br/>Surgeon<br/>Patients</b> | <b>All Exp.<br/>Surgeon<br/>Patients<br/>before<br/>Match</b> | <b>Stand<br/>Diff<br/>before<br/>Match</b> | <b>P<br/>before<br/>Match</b> | <b>Stand<br/>Diff<br/>after<br/>Match</b> | <b>P<br/>after<br/>Match</b> |
|---------------------------------------------|--------------------------------------------------------------|-------------------------------------------------|--------------------------------------------------|---------------------------------------------------------------|--------------------------------------------|-------------------------------|-------------------------------------------|------------------------------|
| Hemoglobin Disorder                         | --*                                                          | --*                                             | --*                                              | 0.0                                                           | 0.01                                       | 0.3563                        | -0.04                                     | 0.2889                       |

Cells marked "--\*" are masked to comply with CMS cell size suppression rules.  
P-values calculated using group tests, with Fisher's exact test used for binary and Wilcoxon rank sum used for continuous variables.

**eTable 11. Outcomes by Surgery Type**  
**eTable 11a. Outcomes for General Surgery**

| Outcome<br>(Percent unless noted)                                                                                                                                                                                                                                                                                                                                                                                                                | Cohort                                          | Estimate | Odds Ratio or<br>Paired Difference | New Vs.<br>Exp.<br>P-value | Exterior<br>Match<br>P-Value |
|--------------------------------------------------------------------------------------------------------------------------------------------------------------------------------------------------------------------------------------------------------------------------------------------------------------------------------------------------------------------------------------------------------------------------------------------------|-------------------------------------------------|----------|------------------------------------|----------------------------|------------------------------|
| Number of Pairs                                                                                                                                                                                                                                                                                                                                                                                                                                  |                                                 | 9,940    | --                                 | --                         | --                           |
| 30-day all<br>Location Mortality                                                                                                                                                                                                                                                                                                                                                                                                                 | New Surgeons                                    | 6.9      | --                                 | --                         | --                           |
|                                                                                                                                                                                                                                                                                                                                                                                                                                                  | Exp. Surg Baseline + Opx + Emerg + Risk Factors | 6.8      | 1.01 (0.90, 1.14)                  | 0.8380                     | 0.1160                       |
|                                                                                                                                                                                                                                                                                                                                                                                                                                                  | Exp. Surg Baseline + Opx + Emerg                | 6.4      | 1.08 (0.96, 1.22)                  | 0.1883                     | 0.2389                       |
|                                                                                                                                                                                                                                                                                                                                                                                                                                                  | Exp. Surg Baseline + Opx                        | 6.2      | 1.12 (1.00, 1.26)                  | 0.0499                     | 0.1969                       |
|                                                                                                                                                                                                                                                                                                                                                                                                                                                  | Exp. Surg Baseline                              | 5.9      | 1.19 (1.06, 1.34)                  | 0.0033                     | --                           |
| 30-day Failure-to-<br>Rescue                                                                                                                                                                                                                                                                                                                                                                                                                     | New Surgeons                                    | 10.3     | --                                 | --                         | --                           |
|                                                                                                                                                                                                                                                                                                                                                                                                                                                  | Exp. Surg Baseline + Opx + Emerg + Risk Factors | 10.5     | 0.97 (0.85, 1.11)                  | 0.6609                     | 0.4778                       |
|                                                                                                                                                                                                                                                                                                                                                                                                                                                  | Exp. Surg Baseline + Opx + Emerg                | 10.0     | 1.05 (0.92, 1.20)                  | 0.4770                     | 0.3997                       |
|                                                                                                                                                                                                                                                                                                                                                                                                                                                  | Exp. Surg Baseline + Opx                        | 9.9      | 1.05 (0.91, 1.20)                  | 0.5391                     | 0.6819                       |
|                                                                                                                                                                                                                                                                                                                                                                                                                                                  | Exp. Surg Baseline                              | 9.7      | 1.03 (0.89, 1.19)                  | 0.7450                     | --                           |
| 30-day Readmission or<br>death                                                                                                                                                                                                                                                                                                                                                                                                                   | New Surgeons                                    | 21.3     | --                                 | --                         | --                           |
|                                                                                                                                                                                                                                                                                                                                                                                                                                                  | Exp. Surg Baseline + Opx + Emerg + Risk Factors | 20.8     | 1.03 (0.96, 1.10)                  | 0.4707                     | 0.0262                       |
|                                                                                                                                                                                                                                                                                                                                                                                                                                                  | Exp. Surg Baseline + Opx + Emerg                | 20.0     | 1.09 (1.01, 1.17)                  | 0.0235                     | 0.7597                       |
|                                                                                                                                                                                                                                                                                                                                                                                                                                                  | Exp. Surg Baseline + Opx                        | 19.9     | 1.09 (1.02, 1.17)                  | 0.0154                     | 0.8504                       |
|                                                                                                                                                                                                                                                                                                                                                                                                                                                  | Exp. Surg Baseline                              | 19.8     | 1.09 (1.02, 1.17)                  | 0.0107                     | --                           |
| Prolonged Length of<br>Stay                                                                                                                                                                                                                                                                                                                                                                                                                      | New Surgeons                                    | 70.1     | --                                 | --                         | --                           |
|                                                                                                                                                                                                                                                                                                                                                                                                                                                  | Exp. Surg Baseline + Opx + Emerg + Risk Factors | 68.2     | 1.10 (1.03, 1.18)                  | 0.0028                     | 0.5842                       |
|                                                                                                                                                                                                                                                                                                                                                                                                                                                  | Exp. Surg Baseline + Opx + Emerg                | 68.0     | 1.11 (1.05, 1.19)                  | 0.0008                     | <.0001                       |
|                                                                                                                                                                                                                                                                                                                                                                                                                                                  | Exp. Surg Baseline + Opx                        | 66.6     | 1.19 (1.12, 1.27)                  | <.0001                     | 0.0001                       |
|                                                                                                                                                                                                                                                                                                                                                                                                                                                  | Exp. Surg Baseline                              | 64.7     | 1.30 (1.22, 1.38)                  | <.0001                     | --                           |
| Anesthesia Time<br>(min., m-est.)                                                                                                                                                                                                                                                                                                                                                                                                                | New Surgeons                                    | 165.0    | --                                 | --                         | --                           |
|                                                                                                                                                                                                                                                                                                                                                                                                                                                  | Exp. Surg Baseline + Opx + Emerg + Risk Factors | 145.6    | 18.3 (16.0, 20.6)                  | <.0001                     | 0.3959                       |
|                                                                                                                                                                                                                                                                                                                                                                                                                                                  | Exp. Surg Baseline + Opx + Emerg                | 145.1    | 18.4 (16.1, 20.6)                  | <.0001                     | 0.0006                       |
|                                                                                                                                                                                                                                                                                                                                                                                                                                                  | Exp. Surg Baseline + Opx                        | 146.4    | 16.7 (14.4, 19.0)                  | <.0001                     | <.0001                       |
|                                                                                                                                                                                                                                                                                                                                                                                                                                                  | Exp. Surg Baseline                              | 149.6    | 12.8 (10.5, 15.1)                  | <.0001                     | --                           |
| ICU Usage                                                                                                                                                                                                                                                                                                                                                                                                                                        | New Surgeons                                    | 33.2     | --                                 | --                         | --                           |
|                                                                                                                                                                                                                                                                                                                                                                                                                                                  | Exp. Surg Baseline + Opx + Emerg + Risk Factors | 30.6     | 1.17 (1.09, 1.26)                  | <.0001                     | 0.0768                       |
|                                                                                                                                                                                                                                                                                                                                                                                                                                                  | Exp. Surg Baseline + Opx + Emerg                | 29.9     | 1.22 (1.14, 1.31)                  | <.0001                     | 0.1541                       |
|                                                                                                                                                                                                                                                                                                                                                                                                                                                  | Exp. Surg Baseline + Opx                        | 29.4     | 1.25 (1.16, 1.33)                  | <.0001                     | 0.6450                       |
|                                                                                                                                                                                                                                                                                                                                                                                                                                                  | Exp. Surg Baseline                              | 29.2     | 1.23 (1.15, 1.31)                  | <.0001                     | --                           |
| Length of Stay<br>(days, m-est.)                                                                                                                                                                                                                                                                                                                                                                                                                 | New Surgeons                                    | 8.8      | --                                 | --                         | --                           |
|                                                                                                                                                                                                                                                                                                                                                                                                                                                  | Exp. Surg Baseline + Opx + Emerg + Risk Factors | 8.5      | 0.2 (0.0, 0.4)                     | 0.0277                     | 0.1202                       |
|                                                                                                                                                                                                                                                                                                                                                                                                                                                  | Exp. Surg Baseline + Opx + Emerg                | 8.4      | 0.3 (0.1, 0.5)                     | 0.0003                     | 0.0007                       |
|                                                                                                                                                                                                                                                                                                                                                                                                                                                  | Exp. Surg Baseline + Opx                        | 8.2      | 0.4 (0.3, 0.6)                     | <.0001                     | 0.0644                       |
|                                                                                                                                                                                                                                                                                                                                                                                                                                                  | Exp. Surg Baseline                              | 8.3      | 0.5 (0.3, 0.7)                     | <.0001                     | --                           |
| 30-day Resource Cost<br>(\$, m-est.)                                                                                                                                                                                                                                                                                                                                                                                                             | New Surgeons                                    | 27,996   | --                                 | --                         | --                           |
|                                                                                                                                                                                                                                                                                                                                                                                                                                                  | Exp. Surg Baseline + Opx + Emerg + Risk Factors | 26,203   | 1,650 (1,035, 2,268)               | <.0001                     | 0.1307                       |
|                                                                                                                                                                                                                                                                                                                                                                                                                                                  | Exp. Surg Baseline + Opx + Emerg                | 25,877   | 1,891 (1,281, 2,503)               | <.0001                     | 0.0145                       |
|                                                                                                                                                                                                                                                                                                                                                                                                                                                  | Exp. Surg Baseline + Opx                        | 25,459   | 2,218 (1,607, 2,827)               | <.0001                     | 0.5185                       |
|                                                                                                                                                                                                                                                                                                                                                                                                                                                  | Exp. Surg Baseline                              | 25,317   | 2,398 (1,781, 3,014)               | <.0001                     | --                           |
| Baseline = Matched for year; Opx = Matched for Operation; Emerg = Matched for Emergent Status; Risk Factors = Matched for patient demographics and comorbidity risk factors.<br>Binary outcomes were compared using McNemar's test while continuous outcomes were tested using m-estimation.<br>The exterior match p-value compares a given group of experienced surgeon controls to those in the row below.<br>Cost is reported using 2013 USD. |                                                 |          |                                    |                            |                              |

**eTable 11b.Outcomes for Orthopedic Surgery**

| Outcome<br>(Percent unless noted)    | Cohort                                          | Estimate | Odds Ratio or<br>Paired Difference | New Vs.<br>Exp.<br>P-value | Exterior<br>Match<br>P-Value |
|--------------------------------------|-------------------------------------------------|----------|------------------------------------|----------------------------|------------------------------|
| Number of Pairs                      |                                                 | 8,260    | --                                 | --                         | --                           |
| 30-day all<br>Location Mortality     | New Surgeons                                    | 5.3      | --                                 | --                         | --                           |
|                                      | Exp. Surg Baseline + Opx + Emerg + Risk Factors | 4.7      | 1.12 (0.97, 1.30)                  | 0.1149                     | 0.4300                       |
|                                      | Exp. Surg Baseline + Opx + Emerg                | 4.5      | 1.18 (1.02, 1.36)                  | 0.0273                     | <.0001                       |
|                                      | Exp. Surg Baseline + Opx                        | 3.7      | 1.45 (1.24, 1.69)                  | <.0001                     | <.0001                       |
|                                      | Exp. Surg Baseline                              | 2.8      | 1.90 (1.61, 2.25)                  | <.0001                     | --                           |
| 30-day Failure-to-<br>Rescue         | New Surgeons                                    | 8.5      | --                                 | --                         | --                           |
|                                      | Exp. Surg Baseline + Opx + Emerg + Risk Factors | 7.8      | 1.03 (0.86, 1.23)                  | 0.7923                     | 0.6678                       |
|                                      | Exp. Surg Baseline + Opx + Emerg                | 7.7      | 1.10 (0.92, 1.31)                  | 0.3276                     | <.0001                       |
|                                      | Exp. Surg Baseline + Opx                        | 6.5      | 1.41 (1.16, 1.70)                  | 0.0004                     | 0.0181                       |
|                                      | Exp. Surg Baseline                              | 5.4      | 1.72 (1.39, 2.12)                  | <.0001                     | --                           |
| 30-day Readmission or<br>death       | New Surgeons                                    | 17.3     | --                                 | --                         | --                           |
|                                      | Exp. Surg Baseline + Opx + Emerg + Risk Factors | 15.8     | 1.11 (1.02, 1.21)                  | 0.0132                     | 0.5560                       |
|                                      | Exp. Surg Baseline + Opx + Emerg                | 16.1     | 1.09 (1.00, 1.18)                  | 0.0467                     | <.0001                       |
|                                      | Exp. Surg Baseline + Opx                        | 14.3     | 1.26 (1.16, 1.38)                  | <.0001                     | <.0001                       |
|                                      | Exp. Surg Baseline                              | 12.2     | 1.52 (1.39, 1.66)                  | <.0001                     | --                           |
| Prolonged Length of<br>Stay          | New Surgeons                                    | 41.1     | --                                 | --                         | --                           |
|                                      | Exp. Surg Baseline + Opx + Emerg + Risk Factors | 37.9     | 1.18 (1.10, 1.27)                  | <.0001                     | 0.0143                       |
|                                      | Exp. Surg Baseline + Opx + Emerg                | 36.7     | 1.26 (1.17, 1.35)                  | <.0001                     | <.0001                       |
|                                      | Exp. Surg Baseline + Opx                        | 31.3     | 1.64 (1.52, 1.76)                  | <.0001                     | <.0001                       |
|                                      | Exp. Surg Baseline                              | 25.9     | 2.12 (1.97, 2.28)                  | <.0001                     | --                           |
| Anesthesia Time<br>(min., m-est.)    | New Surgeons                                    | 147.7    | --                                 | --                         | --                           |
|                                      | Exp. Surg Baseline + Opx + Emerg + Risk Factors | 127.7    | 19.2 (17.7, 20.8)                  | <.0001                     | 0.1358                       |
|                                      | Exp. Surg Baseline + Opx + Emerg                | 128.4    | 18.5 (17.1, 20.1)                  | <.0001                     | <.0001                       |
|                                      | Exp. Surg Baseline + Opx                        | 132.1    | 15.9 (14.3, 17.4)                  | <.0001                     | <.0001                       |
|                                      | Exp. Surg Baseline                              | 136.4    | 11.9 (10.3, 13.5)                  | <.0001                     | --                           |
| ICU Usage                            | New Surgeons                                    | 10.2     | --                                 | --                         | --                           |
|                                      | Exp. Surg Baseline + Opx + Emerg + Risk Factors | 8.5      | 1.26 (1.12, 1.40)                  | 0.0001                     | 0.8187                       |
|                                      | Exp. Surg Baseline + Opx + Emerg                | 8.4      | 1.27 (1.13, 1.42)                  | <.0001                     | 0.0001                       |
|                                      | Exp. Surg Baseline + Opx                        | 7.6      | 1.42 (1.27, 1.59)                  | <.0001                     | <.0001                       |
|                                      | Exp. Surg Baseline                              | 6.4      | 1.70 (1.51, 1.92)                  | <.0001                     | --                           |
| Length of Stay<br>(days, m-est.)     | New Surgeons                                    | 5.9      | --                                 | --                         | --                           |
|                                      | Exp. Surg Baseline + Opx + Emerg + Risk Factors | 5.8      | 0.1 (0.0, 0.2)                     | 0.0017                     | 0.0059                       |
|                                      | Exp. Surg Baseline + Opx + Emerg                | 5.7      | 0.2 (0.1, 0.2)                     | <.0001                     | <.0001                       |
|                                      | Exp. Surg Baseline + Opx                        | 5.4      | 0.4 (0.3, 0.5)                     | <.0001                     | <.0001                       |
|                                      | Exp. Surg Baseline                              | 5.0      | 0.8 (0.7, 0.8)                     | <.0001                     | --                           |
| 30-day Resource Cost<br>(\$, m-est.) | New Surgeons                                    | 17,044   | --                                 | --                         | --                           |
|                                      | Exp. Surg Baseline + Opx + Emerg + Risk Factors | 16,042   | 916 (654, 1,177)                   | <.0001                     | 0.4145                       |
|                                      | Exp. Surg Baseline + Opx + Emerg                | 15,978   | 981 (724, 1,239)                   | <.0001                     | <.0001                       |
|                                      | Exp. Surg Baseline + Opx                        | 15,137   | 1,652 (1,405, 1,899)               | <.0001                     | <.0001                       |
|                                      | Exp. Surg Baseline                              | 13,969   | 2,601 (2,359, 2,843)               | <.0001                     | --                           |

Baseline = Matched for year; Opx = Matched for Operation; Emerg = Matched for Emergent Status; Risk Factors = Matched for patient demographics and comorbidity risk factors.  
 Binary outcomes were compared using McNemar's test while continuous outcomes were tested using m-estimation.  
 The exterior match p-value compares a given group of experienced surgeon controls to those in the row below.  
 Cost is reported using 2013 USD.
